# Supplementary material for: Triflimide-catalyzed allyl–allyl cross-coupling: a metal-free allylic alkylation
Source: Royal Society of Chemistry journal article supplement (doi:10.1039/c2cc33641c), 2012-01-01

## Supporting Information

### Triflimide-catalyzed allyl-allyl cross-coupling: a metal-free allylic alkylation

Feiqing Ding, Ronny William, Fei Wang, and Xue-Wei Liu\*

*Division of Chemistry and Biological Chemistry, School of Physical  
and Mathematical Sciences, Nanyang Technological University,  
Singapore 637371, Singapore*  
Email: [xuewei@ntu.edu.sg](mailto:xuewei@ntu.edu.sg)

| <b>Table of Contents</b>                                                      | <b>Page</b> |
|-------------------------------------------------------------------------------|-------------|
| General experimental                                                          | S2          |
| Materials                                                                     | S3          |
| Optimization studies                                                          | S4          |
| Scope of Leaving Group in triflimide-catalyzed allyl–allyl cross-coupling     | S5          |
| General procedures for the synthesis of cinnamyl acetates <b>1</b> , method A | S6          |
| General procedures for the synthesis of cinnamyl acetates <b>1</b> , method B | S13         |
| General procedures for the synthesis of cinnamyl acetates <b>1</b> , method C | S15         |
| Procedures for the synthesis of <b>2c</b>                                     | S19         |
| Procedure for the synthesis of <b>2d</b>                                      | S21         |
| <sup>1</sup> H and <sup>13</sup> C NMR spectras for all compounds             | S36         |

## **General experimental**

All the reactions were carried out in a flame or oven-dried glassware under an argon or nitrogen atmosphere with freshly distilled solvents under anhydrous conditions unless otherwise indicated. Evaporation of organic solutions was achieved by rotary evaporation with a water bath temperature below 40 °C. Product purification by flash column chromatography was accomplished using silica gel 60 (0.010–0.063 mm). Chromatograms were visualized by fluorescence quenching with UV light at 254 nm or by staining using base solution of potassium permanganate. Technical grade solvents were used for chromatography and were distilled prior to use. IR spectra were recorded using FTIR Restige-21 (Shimadzu). NMR spectra were recorded at room temperature on 300 MHz Bruker ACF 300, 400 MHz Bruker DPX 400, 500 MHz Bruker AMX 500, and 400 MHz JEOL ECA 400 NMR spectrometers. The residual solvent signals were taken as the reference (7.26 ppm for <sup>1</sup>H NMR spectra and 77.0 ppm for <sup>13</sup>C NMR spectra in CDCl<sub>3</sub>, 2.5 ppm for <sup>1</sup>H NMR spectra and 39.5 ppm for <sup>13</sup>C NMR spectra in MeOD). TMS signal at 0.0 ppm was used as an internal standard for partial <sup>1</sup>H NMR spectra. Chemical shift ( $\delta$ ) is reported in ppm, coupling constants ( $J$ ) are given in Hz. The following abbreviations classify the multiplicity: s = singlet, d = doublet, t = triplet, m = multiplet or unresolved, br = broad signal. HRMS (ESI) spectra were recorded on a Waters Q-ToF premier<sup>TM</sup> mass spectrometer.

**Materials:** All solvents were distilled under nitrogen from the following drying agents immediately before use: tetrahydrofuran (THF) was distilled from sodium/benzophenone ketyl; dichloromethane and 1, 2-dichloroethane were distilled from calcium hydride. The cinnamyl acetate (**1a**), cinnamyl alcohol (**1b**), cinnamyl bromide (**1f**), allyltrimethylsilane (**2a**), methallyltrimethylsilane (**2b**) and trimethylsilyl cyclopentadiene (**2e**) were purchased from commercial suppliers and used without further purification. Other cinnamyl acetate derivatives (**1c-1e**, **1g-1h**, **1bs-1ps**) and allyltrimethylsilane derivatives (**2c**, **2d**) were prepared from standard methods according to literature reported procedure. All the catalysts were purchased from commercial suppliers and used without further purification.

**Table 1. Optimization studies.**

1a + 2a  $\xrightarrow{\text{Conditions}}$  Linear, 3a + Branched, 4a

| Entry                   | Catalysts (mol%)              | solvent                                      | Temp (°C)  | 3a/4a <sup>a</sup> | Yield (%) <sup>b</sup> |
|-------------------------|-------------------------------|----------------------------------------------|------------|--------------------|------------------------|
| 1                       | B. A. (1) <sup>c</sup>        | DCM <sup>d</sup>                             | r.t.       | -                  | nr <sup>f</sup>        |
| 2                       | TFA (1)                       | DCM <sup>d</sup>                             | r.t.       | -                  | trace                  |
| 3                       | Amberlyst(1)                  | DCM <sup>d</sup>                             | r.t.       | -                  | trace                  |
| 4                       | MK-10 (1)                     | DCM <sup>d</sup>                             | r.t.       | 54/46              | 24                     |
| 5                       | Tf <sub>2</sub> NH (1)        | DCM <sup>d</sup>                             | r.t.       | 69/31              | 39                     |
| 6                       | Tf <sub>2</sub> NH (1)        | CH <sub>3</sub> NO <sub>2</sub> <sup>d</sup> | r.t.       | -                  | trace                  |
| 7                       | Tf <sub>2</sub> NH (1)        | THF <sup>d</sup>                             | r.t.       | -                  | nr <sup>f</sup>        |
| 8                       | Tf <sub>2</sub> NH (1)        | Toluene <sup>d</sup>                         | r.t.       | -                  | nr <sup>f</sup>        |
| 9                       | Tf <sub>2</sub> NH (1)        | DMF <sup>d</sup>                             | r.t.       | -                  | nr <sup>f</sup>        |
| 10                      | Tf <sub>2</sub> NH (1)        | Dioxone <sup>d</sup>                         | r.t.       | -                  | trace                  |
| 11                      | Tf <sub>2</sub> NH (1)        | Benzene <sup>d</sup>                         | r.t.       | 78/22              | 29                     |
| 12                      | Tf <sub>2</sub> NH (1)        | AcCN <sup>d</sup>                            | r.t.       | -                  | nr <sup>f</sup>        |
| 13                      | Tf <sub>2</sub> NH (1)        | DCM <sup>e</sup>                             | r.t.       | 75/25              | 47                     |
| 14                      | Tf <sub>2</sub> NH (1)        | DCM <sup>e</sup>                             | -40        | 77/23              | 42                     |
| 15                      | Tf <sub>2</sub> NH (1)        | DCM <sup>e</sup>                             | -20        | 75/25              | 53                     |
| 16                      | Tf <sub>2</sub> NH (1)        | DCM <sup>e</sup>                             | 0          | 76/24              | 45                     |
| 17                      | Tf <sub>2</sub> NH (1)        | DCM <sup>e</sup>                             | r.t.       | 75/25              | 47                     |
| 18                      | Tf <sub>2</sub> NH (1)        | DCM <sup>e</sup>                             | 40         | 79/21              | 33                     |
| 19                      | Tf <sub>2</sub> NH (0.5)      | DCM <sup>e</sup>                             | r.t.       | 78/22              | 57                     |
| 20                      | Tf <sub>2</sub> NH (1)        | DCM <sup>e</sup>                             | r.t.       | 75/25              | 53                     |
| 21                      | Tf <sub>2</sub> NH (2)        | DCM <sup>e</sup>                             | r.t.       | 66/34              | 41                     |
| 22 <sup>[g]</sup>       | Tf <sub>2</sub> NH (0.5)      | DCM <sup>e</sup>                             | rt         | 78/22              | 64                     |
| 23 <sup>[h]</sup>       | Tf <sub>2</sub> NH (0.5)      | DCM <sup>e</sup>                             | rt         | 79/21              | 73                     |
| <b>24<sup>[i]</sup></b> | <b>Tf<sub>2</sub>NH (0.5)</b> | <b>DCM<sup>e</sup></b>                       | <b>-20</b> | <b>91/9</b>        | <b>89</b>              |

<sup>a</sup>The ration determined by crude NMR. <sup>b</sup>Isolated yield after purification. <sup>c</sup>B. A. = Brønsted acid (TsOH, H<sub>3</sub>PO<sub>4</sub>, HCl, AcOH, MeSO<sub>3</sub>H). <sup>d</sup>[M] = 0.5 M. <sup>e</sup>[M] = 0.1 M. <sup>f</sup>nr = no reaction. <sup>g</sup>Using 1.5 equiv. **2a**. <sup>h</sup>Using 2.0 equiv. **2a**. <sup>i</sup>Using 3.0 equiv. **2a**.

Table 2. Scope of Leaving Group in triflimide-catalyzed allyl-allyl cross-coupling.

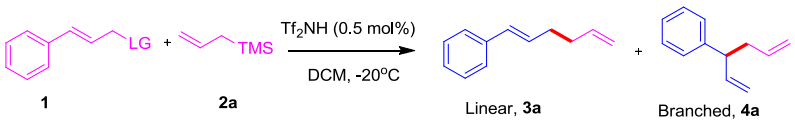

The reaction scheme shows the cross-coupling of allyl bromide (1) and allyltrimethylsilane (2a) catalyzed by Tf<sub>2</sub>NH (0.5 mol%) in DCM at -20°C. The reaction yields a linear product (3a) and a branched product (4a).

| Entry | LG (mol%)                         | 3a/4a <sup>a</sup> | Yield (%) <sup>b</sup> |
|-------|-----------------------------------|--------------------|------------------------|
| 1     | OH ( <b>1b</b> )                  | -                  | nr <sup>[c]</sup>      |
| 2     | OMe ( <b>1c</b> )                 | 74/26              | 63                     |
| 3     | OEt ( <b>1d</b> )                 | 74/26              | 58                     |
| 4     | OTMS ( <b>1e</b> )                | 79/21              | 68                     |
| 5     | Br ( <b>1f</b> )                  | 72/28              | 43                     |
| 6     | OCO <sub>2</sub> Me ( <b>1g</b> ) | 80/20              | 73                     |
| 7     | OBoc ( <b>1h</b> )                | 81/19              | 93                     |

<sup>a</sup>The ration determined by crude NMR. <sup>b</sup>Isolated yield after purification. <sup>c</sup>nr = no reaction. LG = Leaving Group. TMS = Trimethylsilane. Boc = tert-butyl- carbonate.

General procedures for the synthesis of cinnamyl acetates **1**, method A:<sup>1</sup>

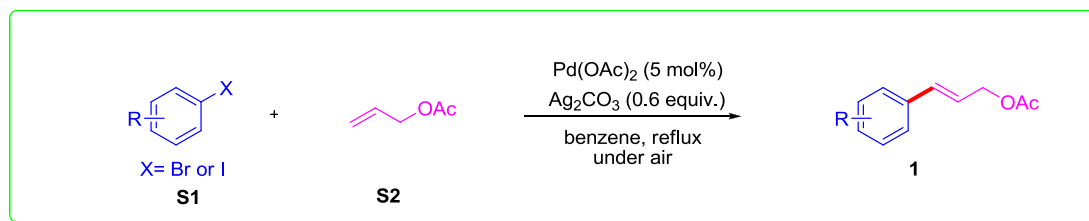

Aryl bromide or iodide **S1** (1.0 mmol) and then allyl acetate **S2** (200 mg, 2.0 mmol) were added to a mixture of Pd(OAc)<sub>2</sub> (11.2 mg, 0.05 mmol) and Ag<sub>2</sub>CO<sub>3</sub> (166 mg, 0.6 mmol) in benzene (6 mL), and the resulting mixture was heated at reflux overnight. The reaction mixture was then concentrated by evaporation, and the residue was purified carefully by flash chromatography on silica gel (eluent: petroleum ether/diethyl ether 10:1) to afford (*E*)-**1s** as a liquid.

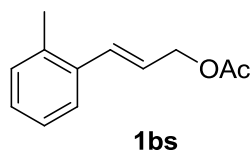

(*E*)-3-*o*-tolylallyl acetate (**1bs**): The title compound was prepared according to the general procedure A. 2-Iodotoluene (218mg, 127  $\mu$ L, 1.0 mmol) and then allyl acetate **S2** (200 mg, 216  $\mu$ L, 2.0 mmol) were added to a mixture of Pd(OAc)<sub>2</sub> (11.2 mg, 0.05 mmol) and Ag<sub>2</sub>CO<sub>3</sub> (166 mg, 0.6 mmol) in benzene (6 mL), and the resulting mixture was heated at reflux overnight. The reaction mixture was then concentrated by evaporation, and the residue was purified carefully by flash chromatography on silica gel (eluent: petroleum ether/diethyl ether 10:1) to afford (*E*)-**1bs** (127 mg, 67%) as a liquid. The NMR datas obtained for **1bs** are in agreement with previously reported

1. Pan, D.; Chen, A.; Su, Y.; Zhou, W.; Li, S.; Jia, W.; Xiao, J.; Liu, Q.; Zhang, L.; Jiao, N. *Angew. Chem., Int. Ed.* **2008**, *47*, 4729–4732.
2. Su, Y.; Jiao, N. *Org. Lett.* **2009**, *11*, 2089.

literature values.<sup>2</sup> (*E*)-3-*o*-tolylallyl acetate (**1bs**): <sup>1</sup>H NMR (CDCl<sub>3</sub>, 400MHz): δ 7.26-7.46 (m, 1H), 7.14-7.19 (m, 3H), 6.88 (d, *J* = 15.6 Hz, 1H), 6.18 (dt, *J* = 6.4, 15.6 Hz, 1H), 4.75 (dd, *J* = 1.2, 16.4 Hz, 2H), 2.36 (s, 3H), 2.11 (s, 3H); <sup>13</sup>C NMR (CDCl<sub>3</sub>, 400MHz): δ 170.8, 135.7, 135.3, 132.1, 130.3, 128.0, 126.2, 125.8, 124.5, 65.3, 21.0, 19.8. FT-IR (CHCl<sub>3</sub>): 3025, 1740, 1513, 1472, 1243, 975 cm<sup>-1</sup>. ESI-MS *m/z* 213.3 [M+Na]<sup>+</sup>.

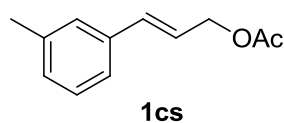

(*E*)-3-*m*-tolylallyl acetate (**1cs**): The title compound was prepared according to the general procedure A. 3-Iodotoluene (218mg, 127 μL, 1.0 mmol) and then allyl acetate **S2** (200 mg, 216 μL, 2.0 mmol) were added to a mixture of Pd(OAc)<sub>2</sub> (11.2 mg, 0.05 mmol) and Ag<sub>2</sub>CO<sub>3</sub> (166 mg, 0.6 mmol) in benzene (6 mL), and the resulting mixture was heated at reflux overnight. The reaction mixture was then concentrated by evaporation, and the residue was purified carefully by flash chromatography on silica gel (eluent: petroleum ether/diethyl ether 10:1) to afford (*E*)-**1cs** (158 mg, 83%) as a liquid. The NMR datas obtained for **1cs** are in agreement with previously reported literature values.<sup>3</sup>

(*E*)-3-*m*-tolylallyl acetate (**1cs**): <sup>1</sup>H NMR (CDCl<sub>3</sub>, 400MHz): δ 7.19-7.25 (m, 3H), 7.06-7.08 (m, 1H), 6.62 (d, *J* = 16.0 Hz, 1H), 6.26 (dt, *J* = 6.8, 16.0 Hz, 1H), 4.71 (dd, *J* = 1.2, 6.4 Hz, 2H), 2.34 (s, 3H), 2.09 (s, 3H); <sup>13</sup>C NMR (CDCl<sub>3</sub>, 400MHz): δ 170.9, 138.2, 136.2, 134.4, 128.9, 128.5, 127.3, 123.8, 123.0, 65.2, 21.4, 21.0.

---

3. Pan, D.; Yu, M.; Chen, W.; Jiao, N. *Chem. Asian J.* **2010**, *5*, 1090–1093.

FT-IR (CHCl<sub>3</sub>): 3020, 1735, 1591, 1470, 1211, 1018, 953 cm<sup>-1</sup>. ESI-MS m/z 213.1

[M+Na]<sup>+</sup>.

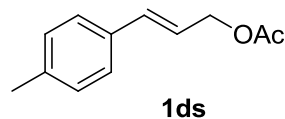

(*E*)-3-*p*-tolylallyl acetate (**1ds**): The title compound was prepared according to the general procedure A. 4-Iodotoluene (218mg, 127 μL, 1.0 mmol) and then allyl acetate **S2** (200 mg, 216 μL, 2.0 mmol) were added to a mixture of Pd(OAc)<sub>2</sub> (11.2 mg, 0.05 mmol) and Ag<sub>2</sub>CO<sub>3</sub> (166 mg, 0.6 mmol) in benzene (6 mL), and the resulting mixture was heated at reflux overnight. The reaction mixture was then concentrated by evaporation, and the residue was purified carefully by flash chromatography on silica gel (eluent: petroleum ether/diethyl ether 10:1) to afford (*E*)-**1ds** (169 mg, 89%) as a liquid. The NMR datas obtained for **1ds** are in agreement with previously reported literature values.<sup>2</sup>

(*E*)-3-*p*-tolylallyl acetate (**1ds**): <sup>1</sup>H NMR (CDCl<sub>3</sub>, 300MHz): δ 7.32 (d, *J* = 7.8 Hz, 2H), 7.16 (d, *J* = 7.8 Hz, 2H), 6.65 (d, *J* = 15.9 Hz, 1H), 6.27 (dt, *J* = 6.6, 15.9 Hz, 1H), 4.74 (dd, *J* = 0.9, 6.3 Hz, 2H), 2.37 (s, 3H), 2.12 (s, 3H); <sup>13</sup>C NMR (CDCl<sub>3</sub>, 300MHz): δ 170.8, 138.0, 134.3, 133.5, 129.3, 126.6, 122.1, 65.2, 21.2, 21.0. FT-IR (CHCl<sub>3</sub>): 3010, 1736, 1485, 1226, 1032 cm<sup>-1</sup>. ESI-MS m/z 190.9 [M+H]<sup>+</sup>.

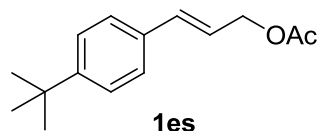

(*E*)-3-(4-*tert*-butylphenyl)allyl acetate (**1es**): The title compound was prepared according to the general procedure A. 4-*tert*-Butyliodobenzene (260mg, 177 μL, 1.0



mmol) and then allyl acetate **S2** (200 mg, 216  $\mu$ L, 2.0 mmol) were added to a mixture of Pd(OAc)<sub>2</sub> (11.2 mg, 0.05 mmol) and Ag<sub>2</sub>CO<sub>3</sub> (166 mg, 0.6 mmol) in benzene (6 mL), and the resulting mixture was heated at reflux overnight. The reaction mixture was then concentrated by evaporation, and the residue was purified carefully by flash chromatography on silica gel (eluent: petroleum ether/diethyl ether 10:1) to afford (*E*)-**1es** (183 mg, 79%) as a liquid. <sup>1</sup>H NMR (CDCl<sub>3</sub>, 300MHz):  $\delta$  7.34-7.41 (m, 4H), 6.67 (d, *J* = 15.6 Hz, 1H), 6.28 (dt, *J* = 6.6, 15.9 Hz, 1H), 4.75 (dd, *J* = 1.2, 6.3 Hz, 2H), 2.12 (s, 3H), 1.35 (s, 9H); <sup>13</sup>C NMR (CDCl<sub>3</sub>, 300MHz):  $\delta$  170.8, 151.2, 134.1, 133.5, 126.4, 125.5, 122.4, 65.2, 34.6, 31.3, 21.0. FT-IR (CHCl<sub>3</sub>): 3023, 1745, 1456, 1325, 1012, 985 cm<sup>-1</sup>. ESI-MS *m/z* 255.2 [M+Na]<sup>+</sup>.

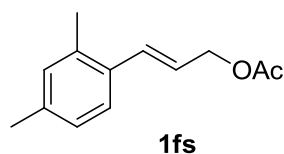

(*E*)-3-(2,4-dimethylphenyl)allyl acetate (**1fs**): The title compound was prepared according to the general procedure A. 1-Iodo-2,4-dimethylbenzene (232mg, 143  $\mu$ L, 1.0 mmol) and then allyl acetate **S2** (200 mg, 216  $\mu$ L, 2.0 mmol) were added to a mixture of Pd(OAc)<sub>2</sub> (11.2 mg, 0.05 mmol) and Ag<sub>2</sub>CO<sub>3</sub> (166 mg, 0.6 mmol) in benzene (6 mL), and the resulting mixture was heated at reflux overnight. The reaction mixture was then concentrated by evaporation, and the residue was purified carefully by flash chromatography on silica gel (eluent: petroleum ether/diethyl ether 10:1) to afford (*E*)-**1fs** (153 mg, 66%) as a liquid. <sup>1</sup>H NMR (CDCl<sub>3</sub>, 400MHz):  $\delta$  7.37 (d, *J* = 8.0 Hz, 1H), 6.99-7.01 (m, 2H), 6.87 (d, *J* = 16 Hz, 1H), 6.16 (dt, *J* = 6.4, 15.6 Hz, 1H), 4.76 (dd, *J* = 1.2, 6.8 Hz, 2H), 2.34 (s, 3H), 2.33 (s, 3H), 2.12 (s, 3H); <sup>13</sup>C

NMR (CDCl<sub>3</sub>, 400MHz):  $\delta$  170.8, 137.8, 135.5, 132.5, 132.1, 131.1, 126.9, 125.8, 123.5, 65.5, 21.1, 21.0, 19.7. FT-IR (CHCl<sub>3</sub>): 3015, 1744, 1465, 1378, 1021, 956 cm<sup>-1</sup>.  
ESI-MS  $m/z$  227.4 [M+Na]<sup>+</sup>.

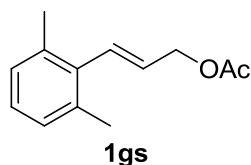

(*E*)-3-(2,6-dimethylphenyl)allyl acetate (**1gs**): The title compound was prepared according to the general procedure A. 1-Iodo-2,6-dimethylbenzene (232mg, 143  $\mu$ L, 1.0 mmol) and then allyl acetate **S2** (200 mg, 216  $\mu$ L, 2.0 mmol) were added to a mixture of Pd(OAc)<sub>2</sub> (11.2 mg, 0.05 mmol) and Ag<sub>2</sub>CO<sub>3</sub> (166 mg, 0.6 mmol) in benzene (6 mL), and the resulting mixture was heated at reflux overnight. The reaction mixture was then concentrated by evaporation, and the residue was purified carefully by flash chromatography on silica gel (eluent: petroleum ether/diethyl ether 10:1) to afford (*E*)-**1fs** (118 mg, 58%) as a liquid. <sup>1</sup>H NMR (CDCl<sub>3</sub>, 400MHz):  $\delta$  7.02-7.07 (m, 3H), 6.65 (d,  $J$  = 16.4 Hz, 1H), 5.81 (dt,  $J$  = 6.4, 16.0 Hz, 1H), 4.76 (d,  $J$  = 6.4 Hz, 2H), 2.30 (s, 6H), 2.12 (s, 3H); <sup>13</sup>C NMR (CDCl<sub>3</sub>, 400MHz):  $\delta$  170.8, 136.0, 132.0, 131.9, 128.6, 127.8, 126.9, 65.3, 21.0, 20.9. FT-IR (CHCl<sub>3</sub>): 3008, 1749, 1463, 1255, 1046, 890 cm<sup>-1</sup>. ESI-MS  $m/z$  227.2 [M+Na]<sup>+</sup>.

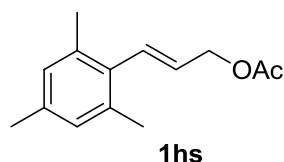

(*E*)-3-mesitylallyl acetate (**1hs**): The title compound was prepared according to the general procedure A. 2-Iodo-1,3,5-trimethylbenzene (246 mg, 160  $\mu$ L, 1.0 mmol) and

then allyl acetate **S2** (200 mg, 216  $\mu$ L, 2.0 mmol) were added to a mixture of Pd(OAc)<sub>2</sub> (11.2 mg, 0.05 mmol) and Ag<sub>2</sub>CO<sub>3</sub> (166 mg, 0.6 mmol) in benzene (6 mL), and the resulting mixture was heated at reflux overnight. The reaction mixture was then concentrated by evaporation, and the residue was purified carefully by flash chromatography on silica gel (eluent: petroleum ether/diethyl ether 10:1) to afford (*E*)-**1hs** (102 mg, 47%) as a liquid. The NMR datas obtained for **1hs** are in agreement with previously reported literature values.<sup>4</sup>

(*E*)-3-mesitylallyl acetate (**1hs**): <sup>1</sup>H NMR (CDCl<sub>3</sub>, 400MHz):  $\delta$  6.82-6.85 (m, 2H), 6.62 (d, *J* = 16.4 Hz, 1H), 5.77(dt, *J* = 6.4, 16.4 Hz, 1H), 4.73 (dd, *J* = 1.6, 6.4 Hz, 2H), 2.26 (s, 3H), 2.25 (s, 6H), 2.09 (s, 3H); <sup>13</sup>C NMR (CDCl<sub>3</sub>, 400MHz):  $\delta$  170.8, 136.5, 135.9, 133.0, 132.0, 129.0, 128.6, 65.4, 21.0, 21.0, 20.8. FT-IR (CHCl<sub>3</sub>): 2985, 1747, 1458, 1229, 1044, 867 cm<sup>-1</sup>. ESI-MS *m/z* 241.3 [M+Na]<sup>+</sup>.

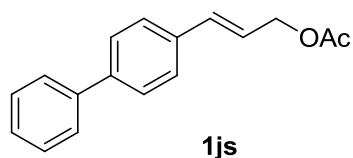

(*E*)-3-(biphenyl-4-yl)allyl acetate (**1js**): The title compound was prepared according to the general procedure A. 4-Iodobiphenyl (280 mg, 1.0 mmol) and then allyl acetate **S2** (200 mg, 216  $\mu$ L, 2.0 mmol) were added to a mixture of Pd(OAc)<sub>2</sub> (11.2 mg, 0.05 mmol) and Ag<sub>2</sub>CO<sub>3</sub> (166 mg, 0.6 mmol) in benzene (6 mL), and the resulting mixture was heated at reflux overnight. The reaction mixture was then concentrated by evaporation, and the residue was purified carefully by flash chromatography on silica gel (eluent: petroleum ether/diethyl ether 10:1) to afford (*E*)-**1js** (186 mg, 74%) as a liquid. The NMR datas obtained for **1js** are in agreement with previously reported

4. (a) Serra-Muns, A.; Guerinot, A.; Reymond, S.; Cossy, J. *Chem. Commun.*, **2010**, 46, 4178–4180;  
(b) Wang, J.; Cui, Z.; Zhang, Y.; Li, H.; Wu L.; Liu, Z. *Org. Biomol. Chem.*, **2011**, 9, 663-666.

literature values.<sup>2</sup>

(*E*)-3-(biphenyl-4-yl)allyl acetate (**1js**): <sup>1</sup>H NMR (CDCl<sub>3</sub>, 400MHz): δ 7.57-7.62 (m, 4H), 7.43-7.48 (m, 4H), 7.34-7.37 (m, 1H), 6.70 (d, *J* = 16.0 Hz, 1H), 6.34 (dt, *J* = 6.4, 16.0 Hz, 1H), 4.76 (d, *J* = 6.4 Hz, 2H), 2.12 (s, 3H); <sup>13</sup>C NMR (CDCl<sub>3</sub>, 400MHz): δ 170.9, 140.8, 140.6, 135.2, 133.8, 128.8, 127.4, 127.3, 127.1, 127.0, 123.3, 65.1, 21.0. FT-IR (CHCl<sub>3</sub>): 1744, 1478, 1385, 1243, 1026, 875 cm<sup>-1</sup>. ESI-MS *m/z* 253.5 [M+H]<sup>+</sup>.

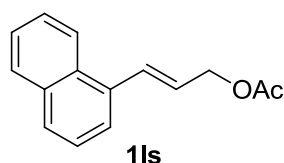

(*E*)-3-(naphthalen-1-yl)allyl acetate (**1ls**): The title compound was prepared according to the general procedure A. 1-Iodonaphthalene (254 mg, 146 μL, 1.0 mmol) and then allyl acetate **S2** (200 mg, 216 μL, 2.0 mmol) were added to a mixture of Pd(OAc)<sub>2</sub> (11.2 mg, 0.05 mmol) and Ag<sub>2</sub>CO<sub>3</sub> (166 mg, 0.6 mmol) in benzene (6 mL), and the resulting mixture was heated at reflux overnight. The reaction mixture was then concentrated by evaporation, and the residue was purified carefully by flash chromatography on silica gel (eluent: petroleum ether/diethyl ether 10:1) to afford (*E*)-**1ls** (149 mg, 66%) as a liquid. The NMR datas obtained for **1ls** are in agreement with previously reported literature values.<sup>5</sup>

(*E*)-3-(naphthalen-1-yl)allyl acetate (**1ls**): <sup>1</sup>H NMR (CDCl<sub>3</sub>, 300MHz): δ 8.11-8.13 (m, 1H), 7.81-7.89 (m, 1H), 7.63(d, *J* = 6.9 Hz, 1H), 7.42-7.62 (m, 4H), 6.75 (dt, *J* = 6.3, 15.6 Hz, 1H), 4.87 (dd, *J* = 1.2, 6.3 Hz, 2H), 2.17 (s, 3H); <sup>13</sup>C NMR (CDCl<sub>3</sub>, 300MHz): δ 170.8, 162.3, 134.0, 133.6, 131.4, 128.6, 128.4, 126.4, 126.2, 125.9, 125.6, 124.1, 123.7, 65.2, 21.0. FT-IR (CHCl<sub>3</sub>): 1757, 1468, 1367, 1251, 1022, 890 cm<sup>-1</sup>. ESI-MS *m/z* 249.2 [M+Na]<sup>+</sup>.

5. Rao, G.V.; Reddy, M. J. R.; Srinivas, K.; Reddy, M. J. R.; Bushan, K. M.; Rao, G. V. *Photochemistry and Photobiology* **2002**, 76, 29-34.

### General procedures for the synthesis of cinnamyl acetates **1**, method B:<sup>2</sup>

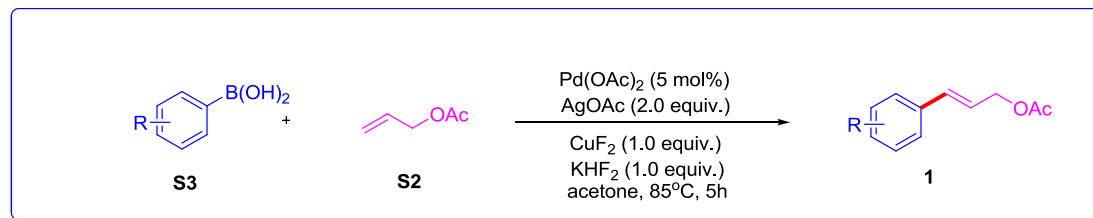

To a mixture of Pd(OAc)<sub>2</sub> (11.2 mg, 0.05 mmol), AgOAc (334 mg, 2.0 mmol), CuF<sub>2</sub> (102 mg, 0.5 mmol), KHF<sub>2</sub> (156 mg, 2.0 mmol) and acetone (5 mL) was added arylboronic acid (1.0 mmol) and allyl acetate (200 mg, 216 μL, 2.0 mmol, 2.0 eq.) subsequently. The reaction mixture was vigorously stirred at 85°C for 5h. After cooling down to room temperature and concentrating in vacuum, and the residue was purified carefully by flash chromatography on silica gel (eluent: petroleum ether/diethyl ether 10:1) to afford (E)-**1** as a liquid.

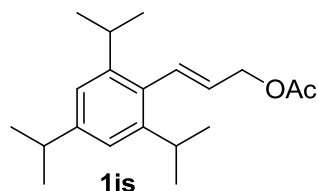

(E)-3-(2,4,6-triisopropylphenyl)allyl acetate (**1is**): The title compound was prepared according to the general procedure B. To a mixture of Pd(OAc)<sub>2</sub> (11.2 mg, 0.05 mmol), AgOAc (334 mg, 2.0 mmol), CuF<sub>2</sub> (102 mg, 0.5 mmol), KHF<sub>2</sub> (156 mg, 2.0 mmol) and acetone (5 mL) was added 2,4,6-triisopropylphenylboronic acid (248 mg, 1.0 mmol) and allyl acetate (200 mg, 216 μL, 2.0 mmol, 2.0 eq.) subsequently. The reaction mixture was vigorously stirred at 85°C for 5h. After cooling down to room temperature and concentrating in vacuum, and the residue was purified carefully by

flash chromatography on silica gel (eluent: petroleum ether/diethyl ether 10:1) to afford (*E*)-**1is** (102 mg, 47%) as a liquid. <sup>1</sup>H NMR (CDCl<sub>3</sub>, 400MHz): δ 6.99 (s, 2H), 6.72 (d, *J* = 16.4 Hz, 1H), 5.69 (dt, *J* = 6.0, 16.0 Hz, 1H), 4.75 (dd, *J* = 1.2, 6.4 Hz, 2H), 3.12-3.19 (m, 2H), 2.85-2.90 (m, 1H), 2.11 (s, 3H), 1.27 (s, 3H), 1.25 (s, 3H), 1.19 (s, 6H), 1.17 (s, 6H); <sup>13</sup>C NMR (CDCl<sub>3</sub>, 400MHz): δ 170.8, 147.8, 146.3, 132.1, 128.5, 121.1, 120.5, 65.1, 34.3, 30.0, 24.0, 23.8, 21.0. FT-IR (CHCl<sub>3</sub>): 2995, 1756, 1437, 1348, 1208, 1031, 950 cm<sup>-1</sup>. ESI-MS *m/z* 325.4 [M+Na]<sup>+</sup>.

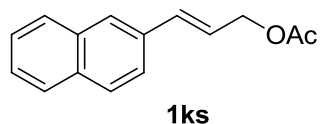

(*E*)-3-(naphthalen-2-yl)allyl acetate (**1ks**): The title compound was prepared according to the general procedure B. To a mixture of Pd(OAc)<sub>2</sub> (11.2 mg, 0.05 mmol), AgOAc (334 mg, 2.0 mmol), CuF<sub>2</sub> (102 mg, 0.5 mmol), KHF<sub>2</sub> (156 mg, 2.0 mmol) and acetone (5 mL) was added 2-naphthylboronic acid (172 mg, 1.0 mmol) and allyl acetate (200 mg, 216 μL, 2.0 mmol, 2.0 eq.) subsequently. The reaction mixture was vigorously stirred at 85°C for 5h. After cooling down to room temperature and concentrating in vacuum, and the residue was purified carefully by flash chromatography on silica gel (eluent: petroleum ether/diethyl ether 10:1) to afford (*E*)-**1ks** (188 mg, 83%) as a liquid. The NMR datas obtained for **1ks** are in agreement with previously reported literature values.<sup>2</sup>

(*E*)-3-(naphthalen-2-yl)allyl acetate (**1ks**): <sup>1</sup>H NMR (CDCl<sub>3</sub>, 400MHz): δ 8.05-8.07 (m, 1H), 7.79-7.82 (m, 1H), 7.74-7.76 (m, 1H), 7.55-7.57 (m, 1H), 7.35-7.50 (m, 4H), 6.27 (dt, *J* = 6.4, 15.6 Hz, 1H), 4.00 (dd, *J* = 1.2, 6.4 Hz, 2H), 2.10 (s, 3H); <sup>13</sup>C NMR (CDCl<sub>3</sub>, 400MHz): δ 170.9, 134.0, 133.6, 131.4, 131.2, 128.6, 128.5, 126.5, 126.3, 125.9, 125.6, 124.2, 123.7, 65.2, 21.1. FT-IR (CHCl<sub>3</sub>): 1752, 1485, 1335, 1234, 1045 cm<sup>-1</sup>. ESI-MS *m/z* 249.2 [M+Na]<sup>+</sup>.

Procedure for the synthesis of (*E*)-3-(4-bromophenyl)allyl acetate **1ms**,  
method C:<sup>6</sup>

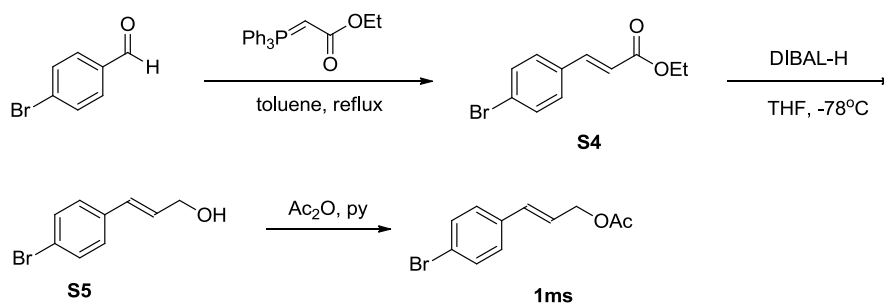

**S4**: The mixture of 4-bromobenzaldehyde (370 mg, 2.0 mmol) and  $\text{EtO}_2\text{CCH}=\text{PPh}_3$  (835 mg, 2.4 mmol) in toluene (4 mL) was refluxed overnight. After reaction was complete, the reaction mixture was loaded to column chromatography to give the product **S4** as yellow oil (450 mg, 88%).

**S5**: To the ethyl ester **S4** (450 mg, 1.76 mmol) in anhydrous  $\text{CH}_2\text{Cl}_2$  (15 mL) was added dropwise DIBAL-H (5.28 mL, 5.28 mmol) at  $-78^\circ\text{C}$ . After reaction was over 2h, MeOH (5 mL) was added dropwise and EtOAc (20 mL) and sodium potassium tartrate (20%  $\text{-H}_2\text{O}$ , 15 mL) were added at  $-78^\circ\text{C}$ . The mixture was stirred at rt for 1 h, extracted with EtOAc. The organic layers were washed with brine and dried over  $\text{Na}_2\text{SO}_4$ . Filtration and evaporation of the solvent under reduced pressure gave a crude product, which was purified by flash column chromatography on silica gel (n-hexane/EtOAc = 6/1) to afford alcohol **S5** as pale yellow oil (326 mg, 87%).

4-Bromocinnamyl acetate **1ms**: Alcohol **S5** (326 mg, 1.53 mmol) and DMAP (9.3 mg, 0.0765 mmol) were dissolved in 10 mL pyridine at  $0^\circ\text{C}$ . Acetic anhydride (0.7 mL, 8 mmol) was added slowly at  $0^\circ\text{C}$ . The solution was stirred at room temperature for 24 h and quenched with  $\text{NaHCO}_3$  solution (aq, 40 mL). It was then diluted with water (20 mL), extracted with  $\text{CH}_2\text{Cl}_2$  (3×50 mL), dried ( $\text{MgSO}_4$ ), evaporated and co-evaporated with toluene (2×10 mL) to remove pyridine, and the residue was

purified carefully by flash chromatography on silica gel (eluent: petroleum ether/diethyl ether 10:1) to afford (*E*)-**1ms** (188 mg, 83%) as a liquid. The NMR datas

6. Mattias Engman, Jarle S. Diesen, Alexander Paptchikhine and Pher G. Andersson. *J. Am. Chem. Soc.* **2007**, *129*, 4536 – 4537.

obtained for **1ks** are in agreement with previously reported literature values.<sup>7</sup>

4-Bromocinnamyl acetate **1ms**: <sup>1</sup>H NMR (CDCl<sub>3</sub>, 400MHz): δ 7.42-7.45 (m, 2H), 7.23-7.26 (m, 2H), 6.58 (d, *J* = 15.6 Hz, 1H), 6.27 (dt, *J* = 6.4, 15.6 Hz, 1H), 4.71 (dd, *J* = 1.2, 6.4 Hz, 2H), 2.10 (s, 3H); <sup>13</sup>C NMR (CDCl<sub>3</sub>, 400MHz): δ 171.8, 135.2, 132.8, 131.7, 128.1, 124.1, 121.9, 64.8, 21.0. FT-IR (CHCl<sub>3</sub>): 1732, 1453, 1308, 1254, 1025, 675 cm<sup>-1</sup>. ESI-MS *m/z* 277.6, 278.4 [M+Na]<sup>+</sup>.

Procedure for the synthesis of (*E*)-3-phenylbut-2-enyl acetate **1ns**, method C:<sup>6</sup>

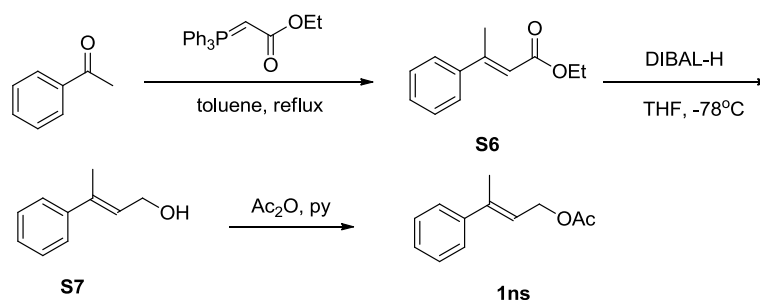

**S6**: The mixture of acetophenone (240 mg, 2.0 mmol) and EtO<sub>2</sub>CCH=PPh<sub>3</sub> (835 mg, 2.4 mmol) in toluene (4 mL) was refluxed overnight. After reaction was complete, the reaction mixture was loaded to column chromatography to give the product **S6** as a liquid (281 mg, 74%).

**S7**: To the ethyl ester **S6** (281 mg, 1.48 mmol) in anhydrous CH<sub>2</sub>Cl<sub>2</sub> (15 mL) was added dropwise DIBAL-H (4.44 mL, 4.44 mmol) at -78°C. After reaction was over 2h, MeOH (4 mL) was added dropwise and EtOAc (15 mL) and sodium potassium tartrate (20%-H<sub>2</sub>O, 10 mL) were added at -78°C. The mixture was stirred at rt for 1 h, extracted with EtOAc. The organic layers were washed with brine and dried over Na<sub>2</sub>SO<sub>4</sub>. Filtration and evaporation of the solvent under reduced pressure gave a crude product, which was purified by flash column chromatography on silica gel (n-hexane/EtOAc = 6/1) to afford alcohol **S7** as colorless oil (183 mg, 84%).



(*E*)-3-phenylbut-2-enyl acetate **1ns**: Alcohol **S7** (183 mg, 1.24 mmol) and DMAP (7.6 mg, 0.062 mmol) were dissolved in 8 mL pyridine at 0°C. Acetic anhydride (0.5 mL, 5.7 mmol) was added slowly at 0°C. The solution was stirred at room temperature for

- 
7. (a) Procopiou, P. A.; Baugh, S. P. D.; Flack, S.; Inglis, G. A. *J. Org. Chem.* **1998**, *63*, 2342-2347.  
(b) Ouellette, R. J.; Shaw, D. L. *J. Am. Chem. Soc.* **1964**, *86*, 1651.

24 h and quenched with NaHCO<sub>3</sub> solution (aq, 20 mL). It was then diluted with water (15 mL), extracted with CH<sub>2</sub>Cl<sub>2</sub> (3×50 mL), dried (MgSO<sub>4</sub>), evaporated and co-evaporated with toluene (2×10 mL) to remove pyridine, and the residue was purified carefully by flash chromatography on silica gel (eluent: petroleum ether/diethyl ether 10:1) to afford (*E*)-**1ns** (158 mg, 67%) as a liquid. The NMR datas obtained for **1ns** are in agreement with previously reported literature values.<sup>8</sup>

<sup>1</sup>H NMR (CDCl<sub>3</sub>, 300MHz): δ 7.27-7.45 (m, 5H), 5.93 (td, *J* = 1.2, 6.9 Hz, 1H), 4.82 (d, *J* = 6.9 Hz, 2H), 2.14 (s, 3H), 2.12 (s, 3H); <sup>13</sup>C NMR (CDCl<sub>3</sub>, 300MHz): δ 171.0, 142.6, 140.2, 128.3, 127.5, 125.9, 121.4, 61.7, 21.0, 16.2. FT-IR (CHCl<sub>3</sub>): 2986, 1750, 1445, 1325, 1246, 978 cm<sup>-1</sup>. ESI-MS *m/z* 213.3 [M+Na]<sup>+</sup>.

Procedure for the synthesis of (*E*)-3-phenylbut-2-enyl acetate **1ps**, method C:<sup>6</sup>

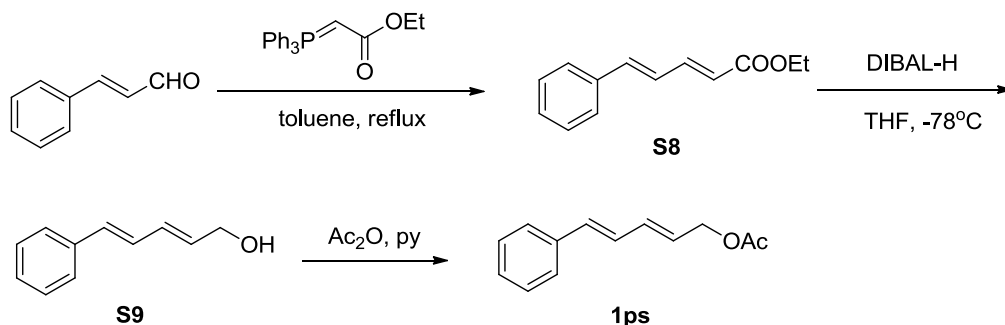

**S8**: The mixture of cinnamaldehyde (264 mg, 2.0 mmol) and EtO<sub>2</sub>CCH=PPh<sub>3</sub> (835 mg, 2.4 mmol) in toluene (4 mL) was refluxed overnight. After reaction was complete, the reaction mixture was loaded to column chromatography to give the product **S8** as a liquid (355 mg, 88%).

**S7**: To the ethyl ester **S8** (355 mg, 1.76 mmol) in anhydrous CH<sub>2</sub>Cl<sub>2</sub> (15 mL) was added dropwise DIBAL-H (5.28 mL, 5.28 mmol) at -78°C. After reaction was over 2h, MeOH (4 mL) was added dropwise and EtOAc (15 mL) and sodium potassium

tartrate (20%-H<sub>2</sub>O, 10 mL) were added at -78°C. The mixture was stirred at rt for 1 h, extracted with EtOAc. The organic layers were washed with brine and dried over Na<sub>2</sub>SO<sub>4</sub>. Filtration and evaporation of the solvent under reduced pressure gave a crude product, which was purified by flash column chromatography on silica gel (n-hexane/

---

8. Marion, N.; Gealageas, R.; Nolan, S. P. *Org. Lett.* **2007**, *9*, 2653-2656.

EtOAc = 6/1) to afford alcohol **S9** as colorless oil (222 mg, 79%).  
(*E*)-3-phenylbut-2-enyl acetate **1ps**: Alcohol **S9** (222 mg, 1.4 mmol) and DMAP (7.6 mg, 0.062 mmol) were dissolved in 8 mL pyridine at 0°C. Acetic anhydride (0.5 mL, 5.7 mmol) was added slowly at 0°C. The solution was stirred at room temperature for 24 h and quenched with NaHCO<sub>3</sub> solution (aq, 20 mL). It was then diluted with water (15 mL), extracted with CH<sub>2</sub>Cl<sub>2</sub> (3×50 mL), dried (MgSO<sub>4</sub>), evaporated and co-evaporated with toluene (2×10 mL) to remove pyridine, and the residue was purified carefully by flash chromatography on silica gel (eluent: petroleum ether/diethyl ether 10:1) to afford (*E*)-**1ps** (200 mg, 1.0 mmol, 72%) as a liquid. The NMR datas obtained for **1ps** are in agreement with previously reported literature values.<sup>1</sup>

<sup>1</sup>H NMR (CDCl<sub>3</sub>, 300MHz): δ 7.20-7.39 (m, 5H), 6.75 (dd, *J* = 7.8, 11.7 Hz, 1H), 6.57 (d, *J* = 11.7 Hz, 1H), 5.93 (q, *J* = 7.8 Hz, 1H), 5.86 (dt, *J* = 4.8, 9.9 Hz, 1H), 4.63 (d, *J* = 4.8 Hz, 2H), 2.06 (s, 3H); <sup>13</sup>C NMR (CDCl<sub>3</sub>, 300MHz): δ 171.8, 137.0, 134.6, 133.8, 128.7, 127.9, 127.7, 126.9, 126.5, 64.7, 21.0. FT-IR (CHCl<sub>3</sub>): 1755, 1468, 1320, 1241, 1021, 750 cm<sup>-1</sup>. ESI-MS *m/z* 225.1 [M+Na]<sup>+</sup>.

Procedure for the synthesis of (*E*)-2-methyl-3-phenylallyl acetate **1os**:

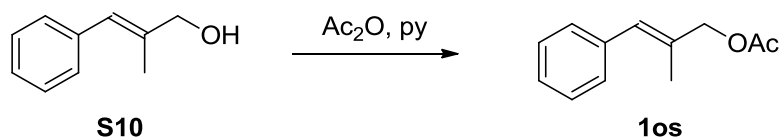

(*E*)-2-methyl-3-phenylallyl acetate **1os**: Trans-2-Methyl-3-phenyl-2-propen-1-ol **S10** (296 mg, 2.0 mmol) and DMAP (12 mg, 0.1 mmol) were dissolved in 10 mL pyridine

at 0°C. Acetic anhydride (0.7 mL, 8 mmol) was added slowly at 0°C. The solution was stirred at room temperature for 24 h and quenched with NaHCO<sub>3</sub> solution (aq, 40 mL). It was then diluted with water (20 mL), extracted with CH<sub>2</sub>Cl<sub>2</sub> (3×50 mL), dried (MgSO<sub>4</sub>), evaporated and co-evaporated with toluene (2×10 mL) to remove pyridine, and the residue was purified carefully by flash chromatography on silica gel (eluent: petroleum ether/diethyl ether 10:1) to afford (*E*)-**1os** (213 mg, 56%) as a liquid. The NMR datas obtained for **1ks** are in agreement with previously reported literature values.<sup>8</sup>

<sup>1</sup>H NMR (CDCl<sub>3</sub>, 400MHz): δ 7.20-7.35 (m, 5H), 6.53 (s, 1H), 4.63 (s, 2H), 2.11(s, 3H), 1.89 (s, 3H); <sup>13</sup>C NMR (CDCl<sub>3</sub>, 400MHz): δ 170.9, 137.1, 132.8, 127.4, 128.3, 125.1, 126.8, 70.2, 21.0, 15.6. FT-IR (CHCl<sub>3</sub>): 2974, 1752, 1473, 1225, 1034, 957 cm<sup>-1</sup>. ESI-MS m/z 213.4 [M+Na]<sup>+</sup>.

#### Procedures for the synthesis of (*E*)-3-Trimethylsilyl-1-phenyl-1-propene **2c**:<sup>9</sup>

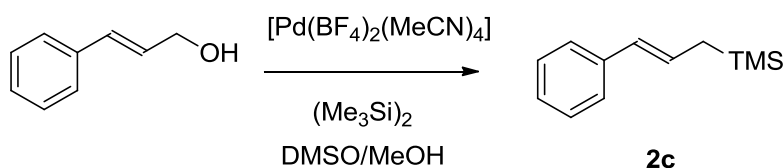

(*E*)-3-Trimethylsilyl-1-phenyl-1-propene **2c**: The cinnamyl alcohol (212 mg, 1.58 mmol) was dissolved in a mixture of methanol and DMSO (2.1 mL/2.1 mL), followed by the addition of hexamethyldisilane (278 mg, 390 μL, 1.9 mmol) and palladium catalyst [Pd(BF<sub>4</sub>)<sub>2</sub>(MeCN)<sub>4</sub>] (35 mg, 0.08 mmol, 5 mol%). Then, this reaction mixture was stirred at 50°C for 15h. The crude reaction mixture was extracted with 3 x 20 mL pentane, followed by drying and evaporation of the organic phase, and the residue was purified carefully using pentane as eluent for silica gel chromatography to afford (*E*)-**2c** (213 mg, 56%) as a liquid. The <sup>1</sup>H NMR data obtained for **2c** is in agreement with previously reported literature values.<sup>9</sup>

(*E*)-3-Trimethylsilyl-1-phenyl-1-propene **2c**:  $^1\text{H}$  NMR ( $\text{CDCl}_3$ , 300MHz):  $\delta$  7.21-7.55 (m, 5H), 6.33-6.35 (m, 2H), 1.75 (d,  $J = 5.7$  Hz, 2H), 0.04 (s, 9H). ESI-MS  $m/z$  213.2  $[\text{M}+\text{H}]^+$ .

- 
9. (a) Selander, N.; Paasch, J. R.; Szabo, K. J. *J. Am. Chem. Soc.* **2011**, *133*, 409–411;  
(b) Moser, R.; Nishikata, T.; Lipshutz, B. H. *Org. Lett.* **2010**, *12*, 28-31.

Procedure for the synthesis of [2-(Trimethylsilyl)ethylidene]cyclohexane **2d**:<sup>9</sup>

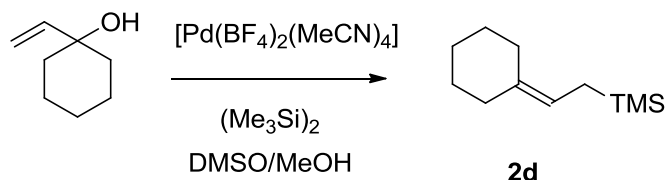

[2-(Trimethylsilyl)ethylidene]cyclohexane **2d**: The 1-vinyl cyclohexanol (200 mg, 1.58 mmol) was dissolved in a mixture of methanol and DMSO (2.1 mL/2.1 mL), followed by the addition of hexamethyldisilane (278 mg, 390  $\mu\text{L}$ , 1.9 mmol) and palladium catalyst  $[\text{Pd}(\text{BF}_4)_2(\text{MeCN})_4]$  (35 mg, 0.08 mmol, 5 mol%). Then, this reaction mixture was stirred at 65°C for 15h. The crude reaction mixture was extracted with 3 x 20 mL pentane, followed by drying and evaporation of the organic phase, and the residue was purified carefully using pentane as eluent for silica gel chromatography to afford (*E*)-**2d** (120 mg, 43%) as a liquid. The NMR datas obtained for **1ks** are in agreement with previously reported literature values.<sup>9, 10</sup>

[2-(Trimethylsilyl)ethylidene]cyclohexane **2d**:  $^1\text{H}$  NMR ( $\text{CDCl}_3$ , 300MHz):  $\delta$  5.12 (t,  $J = 8.7$  Hz, 1H), 2.09-2.12 (m, 4H), 1.52-1.55 (m, 6H), 1.42 (d,  $J = 8.4$  Hz, 2H), 0.02 (s, 9H);  $^{13}\text{C}$  NMR ( $\text{CDCl}_3$ , 400MHz):  $\delta$  136.9, 116.7, 37.3, 28.8, 28.4, 27.6, 27.1, 17.7, -1.8.

10. Hsiao, C.-N.; Shechter, H. *J. Org. Chem.* **1988**, *53*, 2688.

### General procedures for the Triflimide-catalyzed Allyl-Allyl Cross-coupling:

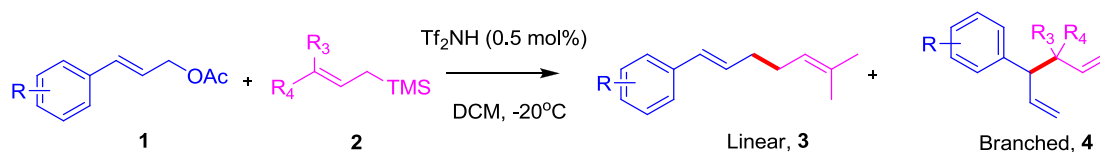

Making a triflimide solution (0.1 M in DCM):<sup>11d</sup>

Step 1: Bring the flame-dried, argon-flushed schlenk flask with rubber septum, HNTf<sub>2</sub> and spatula into dry box.

Step 2: Weigh out desired mass of triflimide (e.g., 562 mg, 2 mmol) into schlenk flask, cap with rubber septa and remove from dry box.

Step 3: Add desired amount of dichloromethane (20 ml) to make a 0.1 M solution.

**General Procedure:** To a solution of allylic acetate **1** (0.2 mmol) in DCM (3 ml) was added allylic silane **2** (3 equiv) under  $\text{N}_2$  atmosphere. The solution was cooled down to  $-20^\circ\text{C}$ , then 0.5 mol%  $\text{Tf}_2\text{NH}$  (, mmol, 0.1M solution in DCM) was added to this mixture. The reaction mixture was stirred for 36 hours at  $-20^\circ\text{C}$  under  $\text{N}_2$  atmosphere. After reaction the mixture was quenched with saturated  $\text{NaHCO}_3$  (3 mL) and subsequently extracted with  $\text{CH}_2\text{Cl}_2$  ( $3 \times 5$  mL). The extract was dried and concentrated in vacuo in ice-water bath. The residue was subjected to column chromatography (silica gel, pentane-diethyl ether = 20:1) to obtain the isomers of product.

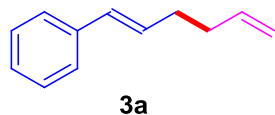

(*E*)-Hexa-1,5-dien-1-ylbenzene (**3a**): To a solution of (*E*)-cinnamyl acetate (**1a**) (88 mg, 0.5 mmol) in DCM (5 ml) was added allyltrimethylsilane **2a** (171mg, 238  $\mu$ L,

- 
11. (a) Yamamoto, Y.; Yatagai, H.; Maruyama, K. *J. Am. Chem. Soc.* **1981**, 103, 1969–1975;  
(b) Antonsson, T.; Moberg, C.; Tottie, L.; Heumann, A. *J. Org. Chem.* **1989**, 54,4914–4929;  
(c) Dewar, M. J. S.; Wade, L. E., Jr. *J. Am. Chem. Soc.* **1977**, 99, 4417–4424;  
(d) Boxer, M. B.; Yamamoto, Y. *Nature Proto.* **2006**, 1, 2434.

1.5 mmol, 3 equiv) under  $N_2$  atmosphere. The solution was cooled down to  $-20\text{ }^\circ\text{C}$ , then 0.5 mol%  $\text{Tf}_2\text{NH}$  (25  $\mu$ L, 0.0025 mmol, 0.1M solution in DCM) was added to this mixture. The reaction mixture was stirred for 36 hours at  $-20\text{ }^\circ\text{C}$  under  $N_2$  atmosphere. After reaction the mixture was quenched with saturated  $\text{NaHCO}_3$  (3 mL) and subsequently extracted with  $\text{CH}_2\text{Cl}_2$  ( $3 \times 5$  mL). The extract was dried and concentrated in vacuo in ice-water bath. The residue was subjected to column chromatography (silica gel, pentane-diethyl ether = 20:1) to obtain the isomers of product **3a** (70 mg, 89%) as a liquid. The NMR datas obtained for **3a** are in agreement with previously reported literature values.<sup>12</sup>

(*E*)-Hexa-1,5-dien-1-ylbenzene (**3a**):  $^1\text{H}$  NMR ( $\text{CDCl}_3$ , 400MHz):  $\delta$  7.30-7.48 (m, 5H), 6.53 (d,  $J = 16.0$  Hz, 1H), 6.35 (dt,  $J = 6.4, 15.6$  Hz, 1H), 5.94-6.04 (m, 1H), 5.16 (dt,  $J = 1.6$  Hz, 13.4 Hz, 1H), 5.12 (dd,  $J = 1.6$  Hz, 13.4 Hz, 1H), 2.35-2.45 (m, 4H);  $^{13}\text{C}$  NMR ( $\text{CDCl}_3$ , 400MHz):  $\delta$  138.1, 137.8, 130.2, 130.1, 128.5, 126.9, 126.0, 114.9, 33.6, 32.5; FT-IR ( $\text{CHCl}_3$ ): 1635, 1610, 995, 910  $\text{cm}^{-1}$ ; HRMS (ESI)  $m/z$   $[\text{M}+\text{Na}]^+$  calcd for  $\text{C}_{12}\text{H}_{14}\text{Na}$  181.0993, found 181.0997.

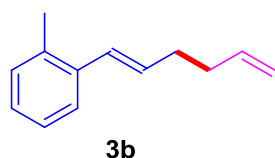

(*E*)-1-(Hexa-1,5-dienyl)-2-methylbenzene (**3b**): To a solution of (*E*)-3-*o*-tolylallyl acetate (**1bs**) (95 mg, 0.5 mmol) in DCM (5 ml) was added allyltrimethylsilane **2a** (171mg, 238  $\mu$ L, 1.5 mmol, 3 equiv) under  $N_2$  atmosphere. The solution was cooled

down to -20 °C, then 0.5 mol% Tf<sub>2</sub>NH (25 μL, 0.0025 mmol, 0.1M solution in DCM) was added to this mixture. The reaction mixture was stirred for 36 hours at -20 °C under N<sub>2</sub> atmosphere. After reaction the mixture was quenched with saturated NaHCO<sub>3</sub> (3 mL) and subsequently extracted with CH<sub>2</sub>Cl<sub>2</sub> (3 × 5 mL). The extract was dried and concentrated in vacuo in ice-water bath. The residue was subjected to

- 
12. (a) Yamamoto, Y.; Yatagai, H.; Maruyama, K. *J. Am. Chem. Soc.* **1981**, *103*, 1969–1975;  
(b) Antonsson, T.; Moberg, C.; Tottie, L.; Heumann, A. *J. Org. Chem.* **1989**, *54*, 4914–4929;  
(c) Dewar, M. J. S.; Wade, L. E., Jr. *J. Am. Chem. Soc.* 1977, *99*, 4417–4424;  
(d) Hatakeyama, T.; Nakagawa, N.; Nakamura, M. *Org. Lett.* **2009**, *11*, 4496–4499;  
(e) Sumida, Y.; Hayashi, S.; Hirano, K.; Yorimitsu, H.; Oshima, K. *Org. Lett.* **2008**, *10*, 1629–1632.

column chromatography (silica gel, pentane-diethyl ether=20:1) to obtain the isomers of product **3b** (75 mg, 88%) as a liquid. The NMR datas obtained for **1ks** are in agreement with previously reported literature values.<sup>12d</sup>

(*E*)-1-(Hexa-1,5-dienyl)-2-methylbenzene (**3b**): <sup>1</sup>H NMR (CDCl<sub>3</sub>, 400MHz): δ 7.40 (d, *J* = 6.4 Hz, 1H), 7.12- 7.19 (m, 3H), 6.60 (d, *J* = 16.0 Hz, 1H), 6.10 ( dt, *J* = 6.4, 15.6 Hz, 1H), 5.83-5.93 (m, 1H), 5.08 (dd, *J* = 1.6 Hz, 13.4 Hz, 1H), 4.97 (d, *J* = 15.6 Hz, 1H), 2.32-2.37 (m, 5H), 2.23-2.28 (m, 2H); <sup>13</sup>C NMR (CDCl<sub>3</sub>, 400MHz): δ 138.1, 136.9, 135.0, 131.5, 130.1, 128.1, 126.8, 126.0, 125.5, 114.9, 33.7, 32.7, 19.8; FT-IR (CHCl<sub>3</sub>): 3010, 1613, 1553, 1462, 995, 905 cm<sup>-1</sup>; HRMS (ESI) *m/z* [M+Na]<sup>+</sup> calcd for C<sub>13</sub>H<sub>16</sub>Na 195.1150, found 195.1143.

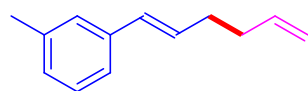

**3c**

(*E*)-1-(hexa-1,5-dienyl)-3-methylbenzene (**3c**): To a solution of (*E*)-3-*m*-tolylallyl acetate (**1cs**) (95 mg, 0.5 mmol) in DCM (5 ml) was added allyltrimethylsilane **2a** (171mg, 238 μL, 1.5 mmol, 3 equiv) under N<sub>2</sub> atmosphere. The solution was cooled down to -20 °C, then 0.5 mol% Tf<sub>2</sub>NH (25 μL, 0.0025 mmol, 0.1M solution in DCM) was added to this mixture. The reaction mixture was stirred for 36 hours at -20 °C under N<sub>2</sub> atmosphere. After reaction the mixture was quenched with saturated NaHCO<sub>3</sub> (3 mL) and subsequently extracted with CH<sub>2</sub>Cl<sub>2</sub> (3 × 5 mL). The extract was dried and concentrated in vacuo in ice-water bath. The residue was subjected to

column chromatography (silica gel, pentane-diethyl ether = 20:1) to obtain the isomers of product **3c** (60 mg, 80%) as a liquid.  $^1\text{H}$  NMR ( $\text{CDCl}_3$ , 400MHz):  $\delta$  7.15-7.19 (m, 3H), 7.01 (d,  $J = 7.2$  Hz, 1H), 6.37 (d,  $J = 15.6$  Hz, 1H), 6.21 (d,  $J = 2.4$ , 15.6 Hz, 1H), 5.82-5.92 (m, 1H), 4.98-5.09 (m, 2H), 2.34 (s, 3H), 2.26-2.32 (m, 2H), 2.22-2.25 (m, 2H);  $^{13}\text{C}$  NMR ( $\text{CDCl}_3$ , 400MHz):  $\delta$  138.2, 138.0, 137.7, 130.3, 129.9, 128.4, 127.7, 126.7, 123.1, 114.9, 33.6, 32.5, 21.4; FT-IR ( $\text{CHCl}_3$ ): 2997, 1642, 1504, 1460, 993, 917  $\text{cm}^{-1}$ ; HRMS (ESI)  $m/z$   $[\text{M}+\text{H}]^+$  calcd for  $\text{C}_{13}\text{H}_{17}$  173.1330, found 173.1333.

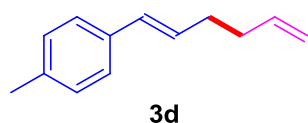

(*E*)-1-(hexa-1,5-dienyl)-4-methylbenzene (**3d**): To a solution of (*E*)-3-*p*-tolylallyl acetate (**1ds**) (95 mg, 0.5 mmol) in DCM (5 ml) was added allyltrimethylsilane **2a** (171mg, 238  $\mu\text{L}$ , 1.5 mmol, 3 equiv) under  $\text{N}_2$  atmosphere. The solution was cooled down to  $-20$   $^\circ\text{C}$ , then 0.5 mol%  $\text{Tf}_2\text{NH}$  (25  $\mu\text{L}$ , 0.0025 mmol, 0.1M solution in DCM) was added to this mixture. The reaction mixture was stirred for 36 hours at  $-20$   $^\circ\text{C}$  under  $\text{N}_2$  atmosphere. After reaction the mixture was quenched with saturated  $\text{NaHCO}_3$  (3 mL) and subsequently extracted with  $\text{CH}_2\text{Cl}_2$  ( $3 \times 5$  mL). The extract was dried and concentrated in vacuo in ice-water bath. The residue was subjected to column chromatography (silica gel, pentane-diethyl ether = 20:1) to obtain the isomers of product **3d** (63 mg, 84%) as a liquid. The NMR datas obtained for **3d** are in agreement with previously reported literature values.<sup>12d,13</sup>

(*E*)-1-(hexa-1,5-dienyl)-4-methylbenzene (**3d**):  $^1\text{H}$  NMR ( $\text{CDCl}_3$ , 400MHz):  $\delta$  7.24 (d,  $J = 8.0$  Hz, 2H), 7.10 (d,  $J = 8.0$  Hz, 2H), 6.37 (d,  $J = 16.0$  Hz, 1H), 6.17 (dt,  $J = 6.4$ , 15.6 Hz, 1H), 5.81-5.91 (m, 1H), 5.06 (dq,  $J = 1.6$ , 17.2 Hz, 1H), 4.98 (dq,  $J = 0.8$ , 17.2 Hz, 1H), 2.32 (s, 3H), 2.21-2.31 (m, 4H);  $^{13}\text{C}$  NMR ( $\text{CDCl}_3$ , 400MHz):  $\delta$  138.2, 136.6, 135.0, 130.0, 129.2, 129.1, 125.9, 114.9, 33.6, 32.4, 21.1; FT-IR ( $\text{CHCl}_3$ ): 2990, 1645, 1468, 990, 910  $\text{cm}^{-1}$ ; HRMS (ESI)  $m/z$   $[\text{M}+\text{Na}]^+$  calcd for  $\text{C}_{13}\text{H}_{16}\text{Na}$  195.1150, found 195.1140.



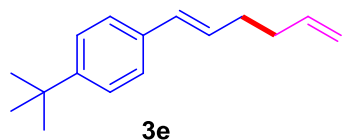

(E)-1-tert-butyl-4-(hexa-1,5-dienyl)benzene (**3e**): To a solution of (*E*)-3-(4-tert-butylphenyl)allyl acetate (**1es**) (116 mg, 0.5 mmol) in DCM (5 ml) was added allyltrimethylsilane **2a** (171mg, 238  $\mu$ L, 1.5 mmol, 3 equiv) under N<sub>2</sub> atmosphere. The solution was cooled down to -20 °C, then 0.5 mol% Tf<sub>2</sub>NH (25  $\mu$ L, 0.0025 mmol,

---

13. Nakamura, H.; Bao, M.; Yamamoto, Y. *Angewandte Chemie, International Edition*, **2001**, *40*, 3208-3210.

0.1M solution in DCM) was added to this mixture. The reaction mixture was stirred for 48 hours at -20 °C under N<sub>2</sub> atmosphere. After reaction the mixture was quenched with saturated NaHCO<sub>3</sub> (3 mL) and subsequently extracted with CH<sub>2</sub>Cl<sub>2</sub> (3  $\times$  5 mL). The extract was dried and concentrated in vacuo in ice-water bath. The residue was subjected to column chromatography (silica gel, pentane-diethyl ether = 20:1) to obtain the isomers of product **3e** (54 mg, 57%) as a liquid. <sup>1</sup>H NMR (CDCl<sub>3</sub>, 300MHz):  $\delta$  7.17-7.36 (m, 4H), 6.42 (d, *J* = 15.9 Hz, 1H), 6.21 (dt, *J* = 6.3, 15.9 Hz, 1H), 5.82-5.96 (m, 1H), 4.99-5.11 (m, 2H), 2.19-2.37 (m, 4H), 1.34 (s, 9H); <sup>13</sup>C NMR (CDCl<sub>3</sub>, 300MHz):  $\delta$  162.3, 150.0, 138.2, 129.9, 129.3, 125.7, 125.4, 114.8, 34.5, 33.6, 32.4, 31.4; FT-IR (CHCl<sub>3</sub>): 3023, 291, 1647, 1526, 1483, 998, 896 cm<sup>-1</sup>; HRMS (ESI) *m/z* [M+H]<sup>+</sup> calcd for C<sub>16</sub>H<sub>23</sub> 215.1800, found 215.1809

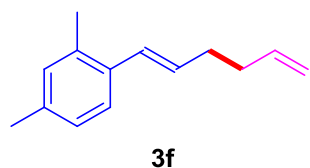

(*E*)-1-(hexa-1,5-dienyl)-2,4-dimethylbenzene (**3f**): To a solution of (*E*)-3-(2,4-dimethylphenyl)allyl acetate (**1fs**) (102 mg, 0.5 mmol) in DCM (5 ml) was added allyltrimethylsilane **2a** (171mg, 238  $\mu$ L, 1.5 mmol, 3 equiv) under N<sub>2</sub> atmosphere. The solution was cooled down to -20 °C, then 0.5 mol% Tf<sub>2</sub>NH (25  $\mu$ L, 0.0025 mmol, 0.1M solution in DCM) was added to this mixture. The reaction mixture was stirred

for 48 hours at -20 °C under N<sub>2</sub> atmosphere. After reaction the mixture was quenched with saturated NaHCO<sub>3</sub> (3 mL) and subsequently extracted with CH<sub>2</sub>Cl<sub>2</sub> (3 × 5 mL). The extract was dried and concentrated in vacuo in ice-water bath. The residue was subjected to column chromatography (silica gel, pentane-diethyl ether = 20:1) to obtain the isomers of product **3f** (52 mg, 64%) as a liquid. <sup>1</sup>H NMR (CDCl<sub>3</sub>, 400MHz): δ 7.30 (d, *J* = 6.4 Hz, 1H), 6.95-6.98 (m, 2H), 6.55 (d, *J* = 16.0 Hz, 1H), 6.05 (dt, *J* = 6.8, 15.6 Hz, 1H), 5.84-5.92 (m, 1H), 4.98-5.09 (m, 2H), 2.31-2.35 (m, 2H), 2.29 (s, 6H), 2.23-2.26 (m, 2H); <sup>13</sup>C NMR (CDCl<sub>3</sub>, 400MHz): δ 138.2, 136.5, 131.0, 130.5, 127.9, 126.7, 125.4, 114.8, 33.7, 32.7, 30.3, 29.7, 21.0, 19.7; FT-IR (CHCl<sub>3</sub>): 3015, 2907, 1624, 1463, 998, 913 cm<sup>-1</sup>; HRMS (ESI) *m/z* [M+H]<sup>+</sup> calcd for C<sub>14</sub>H<sub>19</sub> 187.1487, found 187.1491.

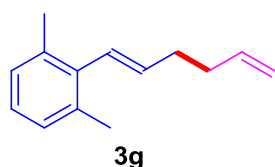

(*E*)-2-(hexa-1,5-dienyl)-1,3-dimethylbenzene (**3g**): To a solution of (*E*)-3-(2,6-dimethylphenyl)allyl acetate (**1gs**) (102 mg, 0.5 mmol) in DCM (5 ml) was added allyltrimethylsilane **2a** (171mg, 238 μL, 1.5 mmol, 3 equiv) under N<sub>2</sub> atmosphere. The solution was cooled down to -20 °C, then 0.5 mol% Tf<sub>2</sub>NH (25 μL, 0.0025 mmol, 0.1M solution in DCM) was added to this mixture. The reaction mixture was stirred for 48 hours at -20 °C under N<sub>2</sub> atmosphere. After reaction the mixture was quenched with saturated NaHCO<sub>3</sub> (3 mL) and subsequently extracted with CH<sub>2</sub>Cl<sub>2</sub> (3 × 5 mL). The extract was dried and concentrated in vacuo in ice-water bath. The residue was subjected to column chromatography (silica gel, pentane-diethyl ether = 20:1) to obtain the isomers of product **3g** (63 mg, 77%) as a liquid. <sup>1</sup>H NMR (CDCl<sub>3</sub>, 400MHz): δ 7.03 (s, 3H), 6.33 (d, *J* = 16.0 Hz, 1H), 5.86-5.96 (m, 1H), 5.67 (dt, *J* = 6.8, 12.0 Hz, 1H), 5.08 (dq, *J* = 1.6, 17.2 Hz, 1H), 5.01 (dq, *J* = 1.2, 10.4 Hz, 1H), 2.33-2.37 (m, 2H), 2.29 (s, 6H), 2.25-2.27 (m, 2H); <sup>13</sup>C NMR (CDCl<sub>3</sub>, 400MHz): δ 138.2, 137.6, 135.9, 134.9, 127.8, 127.6, 126.2, 114.9, 33.8, 32.8, 21.0; FT-IR

(CHCl<sub>3</sub>): 3004, 2913, 1606, 1455, 998, 904 cm<sup>-1</sup>; HRMS (ESI) m/z [M+H]<sup>+</sup> calcd for C<sub>14</sub>H<sub>19</sub> 187.1487, found 187.1474.

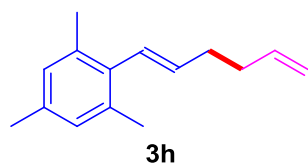

(*E*)-2-(hexa-1,5-dienyl)-1,3,5-trimethylbenzene (**3h**): To a solution of (*E*)-3-mesitylallyl acetate (**1hs**) (54 mg, 0.25 mmol) in DCM (5 ml) was added allyltrimethylsilane **2a** (85 mg, 119 μL, 0.75 mmol, 3 equiv) under N<sub>2</sub> atmosphere. The solution was cooled down to -20 °C, then 0.5 mol% Tf<sub>2</sub>NH (12.5 μL, 0.00125 mmol, 0.1M solution in DCM) was added to this mixture. The reaction mixture was stirred for 48 hours at -20 °C under N<sub>2</sub> atmosphere. After reaction the mixture was quenched with saturated NaHCO<sub>3</sub> (3 mL) and subsequently extracted with CH<sub>2</sub>Cl<sub>2</sub> (3 × 5 mL). The extract was dried and concentrated in vacuo in ice-water bath. The residue was subjected to column chromatography (silica gel, pentane-diethyl ether = 20:1) to obtain the isomers of product **3h** (27 mg, 60%) as a liquid. <sup>1</sup>H NMR (CDCl<sub>3</sub>, 400MHz): δ 6.85 (s, 2H), 6.30 (d, *J* = 16.4 Hz, 1H), 5.83-5.93 (m, 1H), 5.64 (dt, *J* = 6.8, 16.4 Hz, 1H), 4.98-5.09 (m, 2H), 2.29-2.35 (m, 2H), 2.22-2.27 (m, 11H); <sup>13</sup>C NMR (CDCl<sub>3</sub>, 400MHz): δ 138.2, 135.8, 135.6, 134.6, 128.4, 127.7, 114.9, 33.8, 32.8, 20.9; FT-IR (CHCl<sub>3</sub>): 3021, 1603, 1466, 1002, 907 cm<sup>-1</sup>; HRMS (ESI) m/z [M+H]<sup>+</sup> calcd for C<sub>15</sub>H<sub>21</sub> 201.1643, found 201.1643.

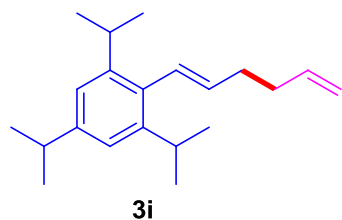

(*E*)-2-(hexa-1,5-dienyl)-1,3,5-triisopropylbenzene (**3i**): To a solution of (*E*)-3-(2,4,6-tri-isopropylphenyl)allyl acetate (**1is**) (75 mg, 0.25 mmol) in DCM (5 ml) was added allyltrimethylsilane **2a** (85 mg, 119 μL, 0.75 mmol, 3 equiv) under N<sub>2</sub>

atmosphere. The solution was cooled down to  $-20\text{ }^{\circ}\text{C}$ , then 0.5 mol%  $\text{Tf}_2\text{NH}$  (12.5  $\mu\text{L}$ , 0.00125 mmol, 0.1M solution in DCM) was added to this mixture. The reaction mixture was stirred for 48 hours at  $-20\text{ }^{\circ}\text{C}$  under  $\text{N}_2$  atmosphere. After reaction the mixture was quenched with saturated  $\text{NaHCO}_3$  (3 mL) and subsequently extracted with  $\text{CH}_2\text{Cl}_2$  ( $3 \times 5$  mL). The extract was dried and concentrated in vacuo in ice-water bath. The residue was subjected to column chromatography (silica gel, pentane-diethyl ether = 20:1) to obtain the isomers of product **3i** (58 mg, 82%) as a liquid.  $^1\text{H}$  NMR ( $\text{CDCl}_3$ , 400MHz):  $\delta$  6.97 (s, 2H), 6.39 (d,  $J = 16.0$  Hz, 1H), 5.82-5.92 (m, 1H), 5.54 (dt,  $J = 6.4, 16.0$  Hz, 1H), 5.06 (dq,  $J = 1.2, 16.8$  Hz, 1H), 4.98-5.01 (m, 1H), 3.20-3.27 (m, 2H), 2.84-2.91 (m, 1H), 2.32-2.37 (m, 2H), 2.24-2.27 (m, 2H), 1.26 (s, 3H), 1.24 (s, 3H), 1.18 (s, 6H), 1.16 (s, 6H);  $^{13}\text{C}$  NMR ( $\text{CDCl}_3$ , 400MHz):  $\delta$  147.1, 146.5, 138.3, 134.5, 133.6, 127.3, 120.3, 114.9, 34.2, 33.8, 32.6, 29.9, 24.1, 23.8; FT-IR ( $\text{CHCl}_3$ ): 3004, 1627, 1528, 1463, 990, 900  $\text{cm}^{-1}$ ; HRMS (ESI)  $m/z$   $[\text{M}+\text{Na}]^+$  calcd for  $\text{C}_{21}\text{H}_{32}\text{Na}$  307.2402, found 307.2412.

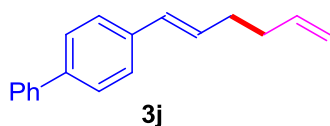

(*E*)-4-(hexa-1,5-dienyl)biphenyl (**3j**): To a solution of (*E*)-3-(biphenyl-4-yl) allyl acetate (**1js**) (63 mg, 0.25 mmol) in DCM (5 ml) was added allyltrimethylsilane **2a** (85 mg, 119  $\mu\text{L}$ , 0.75 mmol, 3 equiv) under  $\text{N}_2$  atmosphere. The solution was cooled down to  $-20\text{ }^{\circ}\text{C}$ , then 0.5 mol%  $\text{Tf}_2\text{NH}$  (12.5  $\mu\text{L}$ , 0.00125 mmol, 0.1M solution in DCM) was added to this mixture. The reaction mixture was stirred for 36 hours at  $-20\text{ }^{\circ}\text{C}$  under  $\text{N}_2$  atmosphere. After reaction the mixture was quenched with saturated  $\text{NaHCO}_3$  (3 mL) and subsequently extracted with  $\text{CH}_2\text{Cl}_2$  ( $3 \times 5$  mL). The extract was dried and concentrated in vacuo in ice-water bath. The residue was subjected to column chromatography (silica gel, pentane-diethyl ether = 20:1) to obtain the isomers of product **3j** (44 mg, 75%) as a liquid.  $^1\text{H}$  NMR ( $\text{CDCl}_3$ , 400MHz):  $\delta$  7.59 (dd,  $J = 1.2, 8.4$  Hz, 2H), 7.54 (dd,  $J = 1.6, 6.4$  Hz, 2H), 7.31-7.45 (m, 5H), 6.44 (d,  $J = 16.0$  Hz, 1H), 6.28 (dt,  $J = 6.4, 16.0$  Hz, 1H), 5.83-5.93 (m, 1H), 5.02-5.10 (m, 2H),

2.32-2.36 (m, 2H), 2.25-2.28 (m, 2H);  $^{13}\text{C}$  NMR ( $\text{CDCl}_3$ , 400MHz):  $\delta$  140.9, 138.1, 136.8, 130.3, 129.8, 128.8, 127.2, 127.0, 126.9, 126.4, 115.0, 77.2, 33.6, 32.5; FT-IR ( $\text{CHCl}_3$ ): 2927, 1613, 1546, 1483, 987, 895  $\text{cm}^{-1}$ ; HRMS (ESI)  $m/z$   $[\text{M}+\text{Na}]^+$  calcd for  $\text{C}_{18}\text{H}_{18}\text{Na}$  257.1306, found 257.1306.

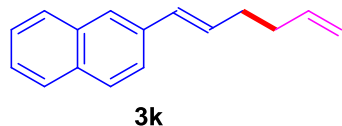

(E)-2-(hexa-1,5-dienyl)naphthalene (**3k**): To a solution of (E)-3-(naphthalen-2-yl)allyl acetate (**1ks**) (57 mg, 0.25 mmol) in DCM (5 ml) was added allyltrimethylsilane **2a** (85 mg, 119  $\mu\text{L}$ , 0.75 mmol, 3 equiv) under  $\text{N}_2$  atmosphere. The solution was cooled down to  $-20\text{ }^\circ\text{C}$ , then 0.5 mol%  $\text{Tf}_2\text{NH}$  (12.5  $\mu\text{L}$ , 0.00125 mmol, 0.1M solution in DCM) was added to this mixture. The reaction mixture was stirred for 36 hours at  $-20\text{ }^\circ\text{C}$  under  $\text{N}_2$  atmosphere. After reaction the mixture was quenched with saturated  $\text{NaHCO}_3$  (3 mL) and subsequently extracted with  $\text{CH}_2\text{Cl}_2$  ( $3 \times 5\text{ mL}$ ). The extract was dried and concentrated in vacuo in ice-water bath. The residue was subjected to column chromatography (silica gel, pentane-diethyl ether = 20:1) to obtain the isomers of product **3k** (35 mg, 68%) as a liquid.  $^1\text{H}$  NMR ( $\text{CDCl}_3$ , 400MHz):  $\delta$  8.12 (d,  $J = 7.6\text{ Hz}$ , 1H), 7.83-7.87 (m, 1H), 7.72-7.76 (m, 1H), 7.39-7.56 (m, 4H), 7.14 (d,  $J = 15.6\text{ Hz}$ , 1H), 6.24 (dt,  $J = 6.8, 15.6\text{ Hz}$ , 1H), 5.87-5.96 (m, 1H), 5.00-5.13 (m, 2H), 2.42-2.47 (m, 2H), 2.30-2.35 (m, 2H);  $^{13}\text{C}$  NMR ( $\text{CDCl}_3$ , 400MHz):  $\delta$  138.1, 133.4, 128.9, 128.4, 127.4, 127.3, 125.8, 125.7, 125.6, 125.4, 124.0, 123.6, 116.2, 115.0, 33.6, 32.8; FT-IR ( $\text{CHCl}_3$ ): 2988, 1625, 1534, 1476, 995, 902  $\text{cm}^{-1}$ ; HRMS (ESI)  $m/z$   $[\text{M}+\text{Na}]^+$  calcd for  $\text{C}_{16}\text{H}_{16}\text{Na}$  231.1150, found 231.1167.

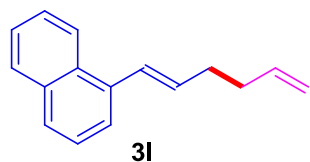

(E)-1-(5-methylhexa-1,5-dienyl)naphthalene (**3l**): To a solution of (E)-3-(naphthalen-1-yl)allyl acetate (**1ls**) (57 mg, 0.25 mmol) in DCM (5 ml) was added

allyltrimethylsilane **2a** (85 mg, 119  $\mu$ L, 0.75 mmol, 3 equiv) under N<sub>2</sub> atmosphere. The solution was cooled down to -20 °C, then 0.5 mol% Tf<sub>2</sub>NH (12.5  $\mu$ L, 0.00125 mmol, 0.1M solution in DCM) was added to this mixture. The reaction mixture was stirred for 36 hours at -20 °C under N<sub>2</sub> atmosphere. After reaction the mixture was quenched with saturated NaHCO<sub>3</sub> (3 mL) and subsequently extracted with CH<sub>2</sub>Cl<sub>2</sub> (3  $\times$  5 mL). The extract was dried and concentrated in vacuo in ice-water bath. The residue was subjected to column chromatography (silica gel, pentane-diethyl ether = 20:1) to obtain the isomers of product **3l** (40 mg, 76%) as a liquid. The NMR datas obtained for **3l** are in agreement with previously reported literature values.<sup>14</sup>

---

14. Azemi, T.; Kitamura, M.; Narasaka, K. *Tetrahedron*, **2004**, *60*, 1339-1344.

(*E*)-1-(5-methylhexa-1,5-dienyl)naphthalene (**3l**): <sup>1</sup>H NMR (CDCl<sub>3</sub>, 400MHz):  $\delta$  8.12 (d, *J* = 6.8 Hz, 1H), 7.84 (d, *J* = 7.6 Hz, 1H), 7.75 (d, *J* = 8.0 Hz, 1H), 7.40-7.56 (m, 3H), 7.14 (d, *J* = 15.2 Hz, 1H), 6.24 (dt, *J* = 2.8, 15.6 Hz, 1H), 5.87-5.97 (m, 1H), 5.00-5.14 (m, 3H), 2.42-2.47 (m, 2H), 2.29-2.35 (m, 2H); <sup>13</sup>C NMR (CDCl<sub>3</sub>, 400MHz):  $\delta$  141.1, 138.1, 135.6, 133.6, 133.4, 128.5, 127.5, 127.3, 125.8, 125.7, 125.6, 124.0, 123.6, 115.0, 33.6, 32.8; FT-IR (CHCl<sub>3</sub>): 3014, 2913, 1606, 1510, 1457, 993, 906 cm<sup>-1</sup>; HRMS (ESI) *m/z* [M+H]<sup>+</sup> calcd for C<sub>16</sub>H<sub>16</sub>Na 231.1150, found 231.1155.

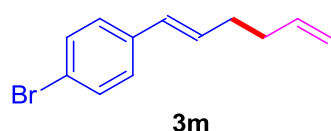

(*E*)-1-bromo-4-(hexa-1,5-dienyl)benzene (**3m**): To a solution of 4-Bromocinnamyl acetate **1ms** (70 mg, 0.25 mmol) in DCM (5 ml) was added allyltrimethylsilane **2a** (85 mg, 119  $\mu$ L, 0.75 mmol, 3 equiv) under N<sub>2</sub> atmosphere. The solution was cooled down to -20 °C, then 0.5 mol% Tf<sub>2</sub>NH (12.5  $\mu$ L, 0.00125 mmol, 0.1M solution in DCM) was added to this mixture. The reaction mixture was stirred for 48 hours at -20 °C under N<sub>2</sub> atmosphere. After reaction the mixture was quenched with saturated NaHCO<sub>3</sub> (3 mL) and subsequently extracted with CH<sub>2</sub>Cl<sub>2</sub> (3  $\times$  5 mL). The extract was dried and concentrated in vacuo in ice-water bath. The residue was subjected to

column chromatography (silica gel, pentane-diethyl ether = 20:1) to obtain the isomers of product **3m** (29 mg, 54%) as a liquid. The NMR datas obtained for **3m** are in agreement with previously reported literature values.<sup>15</sup>

(E)-1-bromo-4-(hexa-1,5-dienyl)benzene (**3m**): <sup>1</sup>H NMR (CDCl<sub>3</sub>, 300MHz): δ 7.40-7.46 (m, 2H), 7.21-7.28 (m, 2H), 6.37 (d, *J* = 16.2 Hz, 1H), 6.19-6.28 (m, 1H), 5.81-5.98 (m, 1H), 4.99-5.12 (m, 2H), 2.22-2.37 (m, 4H); <sup>13</sup>C NMR (CDCl<sub>3</sub>, 300MHz): δ 137.9, 136.7, 131.6, 131.0, 139.1, 127.5, 120.5, 115.1, 33.4, 32.4; FT-IR (CHCl<sub>3</sub>): 2998, 1615, 1578, 1453, 998, 912, 576 cm<sup>-1</sup>; HRMS (ESI) *m/z* [M+H]<sup>+</sup> calcd for C<sub>12</sub>H<sub>14</sub>Br 237.0279, found 237.0275.

---

15. Flegeau, E. F.; Schneider, U.; Kobayashi, S. *Chem. Eur. J.* **2009**, *15*, 12247-12254.

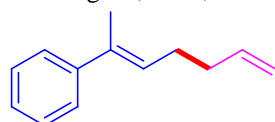

**3n**

(E)-hepta-2,6-dien-2-ylbenzene (**3n**): To a solution of (*E*)-3-phenylbut-2-enyl acetate **1ns** (48 mg, 0.25 mmol) in DCM (5 ml) was added allyltrimethylsilane **2a** (85 mg, 119 μL, 0.75 mmol, 3 equiv) under N<sub>2</sub> atmosphere. The solution was cooled down to -20 °C, then 0.5 mol% Tf<sub>2</sub>NH (12.5 μL, 0.00125 mmol, 0.1M solution in DCM) was added to this mixture. The reaction mixture was stirred for 48 hours at -20 °C under N<sub>2</sub> atmosphere. After reaction the mixture was quenched with saturated NaHCO<sub>3</sub> (3 mL) and subsequently extracted with CH<sub>2</sub>Cl<sub>2</sub> (3 × 5 mL). The extract was dried and concentrated in vacuo in ice-water bath. The residue was subjected to column chromatography (silica gel, pentane-diethyl ether = 20:1) to obtain the isomers of product **3n** (18 mg, 43%) as a liquid. The NMR datas obtained for **3n** are in agreement with previously reported literature values.<sup>14</sup>

<sup>1</sup>H NMR (CDCl<sub>3</sub>, 300MHz): δ 7.21-7.42 (m, 5H), 5.86-5.97 (m, 1H), 5.80-5.84 (m, 1H), 5.09 (dq, *J* = 1.5, 18.5 Hz, 1H), 5.00-5.04 (m, 1H), 2.23-2.35 (m, 4H), 2.07 (s, 3H); <sup>13</sup>C NMR (CDCl<sub>3</sub>, 300MHz): δ 143.9, 138.4, 135.1, 128.1, 127.7, 126.5, 125.6, 114.8, 33.7, 28.2, 15.9; HRMS (ESI) *m/z* [M+Na]<sup>+</sup> calcd for C<sub>13</sub>H<sub>16</sub>Na 195.1150, found 195.1159.

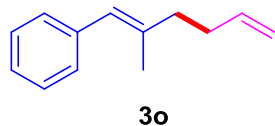

(E)-(2-methylhexa-1,5-dien-1-yl)benzene (**3o**): To a solution of (*E*)-2-methyl-3-phenylallyl acetate **1os** (48 mg, 0.25 mmol) in DCM (5 ml) was added allyltrimethylsilane **2a** (85 mg, 119  $\mu$ L, 0.75 mmol, 3 equiv) under  $N_2$  atmosphere. The solution was cooled down to  $-20$   $^{\circ}C$ , then 0.5 mol%  $Tf_2NH$  (12.5  $\mu$ L, 0.00125 mmol, 0.1M solution in DCM) was added to this mixture. The reaction mixture was stirred for 36 hours at  $-20$   $^{\circ}C$  under  $N_2$  atmosphere. After reaction the mixture was quenched with saturated  $NaHCO_3$  (3 mL) and subsequently extracted with  $CH_2Cl_2$  ( $3 \times 5$  mL). The extract was dried and concentrated in vacuo in ice-water bath. The residue was subjected to column chromatography (silica gel, pentane-diethyl ether = 20:1) to obtain the isomers of product **3o** (37 mg, 87%) as a liquid. The NMR datas obtained for **3o** are in agreement with previously reported literature values.<sup>15a</sup>

(E)-(2-methylhexa-1,5-dien-1-yl)benzene (**3o**):  $^1H$  NMR ( $CDCl_3$ , 400MHz):  $\delta$  7.21-7.38 (m, 5H), 6.33 (s, 1H), 5.87-5.98 (m, 1H), 5.14 (dt,  $J = 3.2, 16.2$  Hz, 1H), 5.04 (dd,  $J = 2.0, 10.4$  Hz, 1H), 2.28-2.36 (m, 4H), 1.91 (s, 3H);  $^{13}C$  NMR ( $CDCl_3$ , 100MHz):  $\delta$  138.4, 138.3, 128.8, 128.0, 125.9, 126.9, 125.2, 114.7, 40.0, 32.4, 17.8; HRMS (ESI)  $m/z$   $[M+Na]^+$  calcd for  $C_{13}H_{16}Na$  195.1150, found 195.1154.

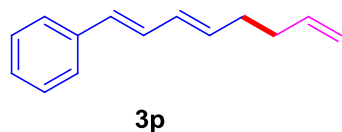

(1*E*, 3*E*)-octa-1,3,7-trienylbenzene (**3p**): To a solution of (*E*)-3-phenylbut-2-enyl acetate **1ps** (50 mg, 0.25 mmol) in DCM (5 ml) was added allyltrimethylsilane **2a** (85 mg, 119  $\mu$ L, 0.75 mmol, 3 equiv) under  $N_2$  atmosphere. The solution was cooled down to  $-20$   $^{\circ}C$ , then 0.5 mol%  $Tf_2NH$  (12.5  $\mu$ L, 0.00125 mmol, 0.1M solution in DCM) was added to this mixture. The reaction mixture was stirred for 36 hours at  $-20$   $^{\circ}C$  under  $N_2$  atmosphere. After reaction the mixture was quenched with saturated  $NaHCO_3$  (3 mL) and subsequently extracted with  $CH_2Cl_2$  ( $3 \times 5$  mL). The extract was



dried and concentrated in vacuo in ice-water bath. The residue was subjected to column chromatography (silica gel, pentane-diethyl ether = 20:1) to obtain the isomers of product **3p** (25 mg, 55%) as a liquid.  $^1\text{H}$  NMR ( $\text{CDCl}_3$ , 400MHz):  $\delta$  7.38 (d,  $J = 7.6$  Hz, 2H), 7.26-7.32 (m, 2H), 7.18-7.22 (m, 1H), 6.76 (dd,  $J = 10.4, 15.6$  Hz, 1H), 6.46 (d,  $J = 15.6$  Hz, 1H), 6.24 (d,  $J = 10.4, 15.2$  Hz, 1H), 5.80-5.88 (m, 2H), 5.06 (d,  $J = 12.2$  Hz, 1H), 5.00 (d,  $J = 10.0$  Hz, 1H), 2.20-2.29 (m, 4H);  $^{13}\text{C}$  NMR ( $\text{CDCl}_3$ , 400MHz):  $\delta$  138.1, 137.6, 134.8, 131.0, 130.3, 129.3, 128.6, 127.1, 126.2, 114.9, 33.5, 32.3; FT-IR ( $\text{CHCl}_3$ ): 2995, 2837, 1643, 1511, 1462, 909  $\text{cm}^{-1}$ ; HRMS (ESI)  $m/z$   $[\text{M}+\text{Na}]^+$  calcd for  $\text{C}_{14}\text{H}_{16}\text{Na}$  207.1150, found 207.1158.

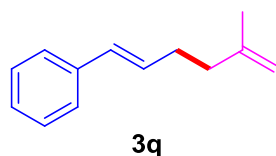

(*E*)-(5-methylhexa-1,5-dienyl)benzene (**3q**): To a solution of (*E*)-cinnamyl acetate (**1a**) (44 mg, 0.25 mmol) in DCM (5 ml) was added methallyltrimethylsilane **2b** (96 mg, 131  $\mu\text{L}$ , 0.75 mmol, 3 equiv) under  $\text{N}_2$  atmosphere. The solution was cooled down to  $-20$   $^\circ\text{C}$ , then 0.5 mol%  $\text{Tf}_2\text{NH}$  (12.5  $\mu\text{L}$ , 0.00125 mmol, 0.1M solution in DCM) was added to this mixture. The reaction mixture was stirred for 36 hours at  $-20$   $^\circ\text{C}$  under  $\text{N}_2$  atmosphere. After reaction the mixture was quenched with saturated  $\text{NaHCO}_3$  (3 mL) and subsequently extracted with  $\text{CH}_2\text{Cl}_2$  ( $3 \times 5$  mL). The extract was dried and concentrated in vacuo in ice-water bath. The residue was subjected to column chromatography (silica gel, pentane-diethyl ether = 20:1) to obtain the isomers of product **3q** (28 mg, 66%) as a liquid. The NMR datas obtained for **3q** are in agreement with previously reported literature values.<sup>12e, 15a, 16</sup>

$^1\text{H}$  NMR ( $\text{CDCl}_3$ , 300MHz):  $\delta$  7.31-7.41 (m, 5H), 6.46 (d,  $J = 15.9$  Hz, 1H), 6.26 (dt,  $J = 6.6, 15.9$  Hz, 1H), 4.78-4.80 (m, 2H), 2.37-2.49 (m, 2H), 2.21-2.26 (m, 2H), 1.81 (s, 3H);  $^{13}\text{C}$  NMR ( $\text{CDCl}_3$ , 300MHz):  $\delta$  130.4, 130.0, 128.5, 128.4, 127.7, 126.9, 126.0, 110.3, 37.5, 31.2, 22.5; HRMS (ESI)  $m/z$   $[\text{M}+\text{Na}]^+$  calcd for  $\text{C}_{13}\text{H}_{16}\text{Na}$  195.1150, found 195.1150.

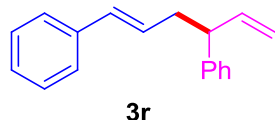

(*S, E*)-hexa-1,5-diene-1,4-diylidibenzene (**3r**): To a solution of (*E*)-cinnamyl acetate (**1a**) (44 mg, 0.25 mmol) in DCM (5 ml) was added (*E*)-3-Trimethylsilyl-1-phenyl-1-propene **2c** (159 mg, 0.75 mmol, 3 equiv) under N<sub>2</sub> atmosphere. The solution was cooled down to -20 °C, then 0.5 mol% Tf<sub>2</sub>NH (12.5 μL, 0.00125 mmol, 0.1M solution

---

16. Crowe, W. E.; Zhang, Z. J. *J. Am. Chem. Soc.* **1993**, *115*, 10998-10999.

17. (a) Barrero, A. F.; Herrador, M. M.; Moral, J. F.; Arteaga, P.; Arteaga, J. F.; Dieguez, H. R.; Sanchez, E. M, *J. Org. Chem.* **2007**, *72*, 2988 – 2995; (b) Médéjan, S.; Hélicon, F.; Namy, J. L. *Eur. J. Org. Chem.* **2005**, 4715–472.

in DCM) was added to this mixture. The reaction mixture was stirred for 36 hours at -20 °C under N<sub>2</sub> atmosphere. After reaction the mixture was quenched with saturated NaHCO<sub>3</sub> (3 mL) and subsequently extracted with CH<sub>2</sub>Cl<sub>2</sub> (3 × 5 mL). The extract was dried and concentrated in vacuo in ice-water bath. The residue was subjected to column chromatography (silica gel, pentane-diethyl ether = 20:1) to obtain the isomers of product **3r** (37 mg, 70%) as a liquid. The NMR datas obtained for **3r** are in agreement with previously reported literature values.<sup>17</sup>

(*S, E*)-hexa-1,5-diene-1,4-diylidibenzene (**3r**): <sup>1</sup>H NMR (CDCl<sub>3</sub>, 400MHz): δ 7.16-7.38 (m, 10H), 6.38 (d, *J* = 16.0 Hz, 1H), 6.13 (dt, *J* = 7.2, 15.6 Hz, 1H), 5.98-6.06 (m, 1H), 5.04-5.09 (m, 2H), 3.43 (q, *J* = 7.6 Hz, 1H), 2.62-2.66 (m, 2H); <sup>13</sup>C NMR (CDCl<sub>3</sub>, 400MHz): δ 145.6, 143.3, 133.2, 130.6, 130.3, 130.2, 129.5, 128.8, 128.2, 127.9, 127.5, 116.5, 51.8, 40.8; HRMS (ESI) *m/z* [M+Na]<sup>+</sup> calcd for C<sub>18</sub>H<sub>19</sub> 235.1487, found 235.1479.

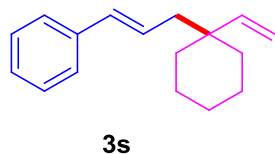

(*E*)-(3-(1-vinylcyclohexyl)prop-1-enyl)benzene (**3s**): To a solution of (*E*)-cinnamyl acetate (**1a**) (44 mg, 0.25 mmol) in DCM (5 ml) was added [2-(Trimethylsilyl)ethylidene]cyclohexane **2d** (136 mg, 0.75 mmol, 3 equiv) under N<sub>2</sub> atmosphere. The

solution was cooled down to -20 °C, then 0.5 mol% Tf<sub>2</sub>NH (12.5 μL, 0.00125 mmol, 0.1M solution in DCM) was added to this mixture. The reaction mixture was stirred for 48 hours at -20 °C under N<sub>2</sub> atmosphere. After reaction the mixture was quenched with saturated NaHCO<sub>3</sub> (3 mL) and subsequently extracted with CH<sub>2</sub>Cl<sub>2</sub> (3 × 5 mL). The extract was dried and concentrated in vacuo in ice-water bath. The residue was subjected to column chromatography (silica gel, pentane-diethyl ether = 20:1) to obtain the isomers of product **3s** (20 mg, 36%) as a liquid. The NMR datas obtained for **3r** are in agreement with previously reported literature values.<sup>12e</sup>

(E)-(3-(1-vinylcyclohexyl)prop-1-enyl)benzene (**3s**): <sup>1</sup>H NMR (CDCl<sub>3</sub>, 400MHz): δ 7.15-7.34 (m, 5H), 6.35 (d, *J* = 16.0 Hz, 1H), 6.19 (dd, *J* = 7.2, 11.2 Hz, 1H), 5.71 (dd, *J* = 11.2, 18.0 Hz, 1H), 5.11 (dd, *J* = 1.2, 10.8 Hz, 1H), 4.93 (dd, *J* = 1.2, 16.0 Hz, 1H), 2.20 (dd, *J* = 1.2, 6.8 Hz, 2H), 1.26-1.60 (m, 10H); <sup>13</sup>C NMR (CDCl<sub>3</sub>, 400MHz): δ 146.3, 137.9, 131.8, 128.4, 127.3, 126.8, 126.0, 112.9, 40.3, 35.5, 26.4, 22.1, 22.0; HRMS (ESI) *m/z* [M+Na]<sup>+</sup> calcd for C<sub>17</sub>H<sub>22</sub>Na 249.1619, found 249.1609.

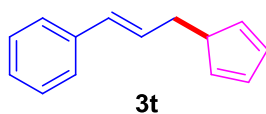

(E)-(3-(cyclopenta-2,4-dienyl)prop-1-enyl)benzene (**3t**): To a solution of (*E*)-cinnamyl acetate (**1a**) (44 mg, 0.25 mmol) in DCM (5 ml) was added trimethylsilyl cyclopentadiene **2e** (103 mg, 0.75 mmol, 3 equiv) under N<sub>2</sub> atmosphere. The solution was cooled down to -20 °C, then 0.5 mol% Tf<sub>2</sub>NH (12.5 μL, 0.00125 mmol, 0.1M solution in DCM) was added to this mixture. The reaction mixture was stirred for 36 hours at -20 °C under N<sub>2</sub> atmosphere. After reaction the mixture was quenched with saturated NaHCO<sub>3</sub> (3 mL) and subsequently extracted with CH<sub>2</sub>Cl<sub>2</sub> (3 × 5 mL). The extract was dried and concentrated in vacuo in ice-water bath. The residue was subjected to column chromatography (silica gel, pentane-diethyl ether = 20:1) to obtain the isomers of product **3t** (25 mg, 63%) as a liquid. <sup>1</sup>H NMR (CDCl<sub>3</sub>, 400MHz): δ 7.29-7.31 (m, 2H), 7.17-7.26 (m, 3H), 6.42-6.45 (m, 1H), 6.29-6.31 (m, 1H), 6.20-6.24 (m, 2H), 5.12 (dt, *J* = 1.2, 10.0 Hz, 1H), 5.00(dt, *J* = 1.6, 17.2 Hz, 1H),

*F. Ding et al.*

*Supporting Information*

4.45 (d,  $J = 7.6$  Hz, 1H), 2.85 (d,  $J = 1.6$  Hz, 2H);  $^{13}\text{C}$  NMR ( $\text{CDCl}_3$ , 400MHz):  $\delta$  150.7, 143.4, 140.6, 132.1, 131.8, 128.3, 126.3, 115.3, 51.5, 42.6; FT-IR ( $\text{CHCl}_3$ ): 3013, 2894, 1652, 1521, 1467, 903, 785  $\text{cm}^{-1}$ ; HRMS (ESI)  $m/z$   $[\text{M}+\text{H}]^+$  calcd for  $\text{C}_{14}\text{H}_{15}$  183.1174, found 183.1171.

# $^1\text{H}$ and $^{13}\text{C}$ NMR spectra for all compounds

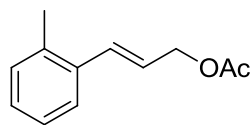

R2-114-1p, BBF01-400Hz,  $^1\text{H}$ ,  $\text{cdCl}_3$

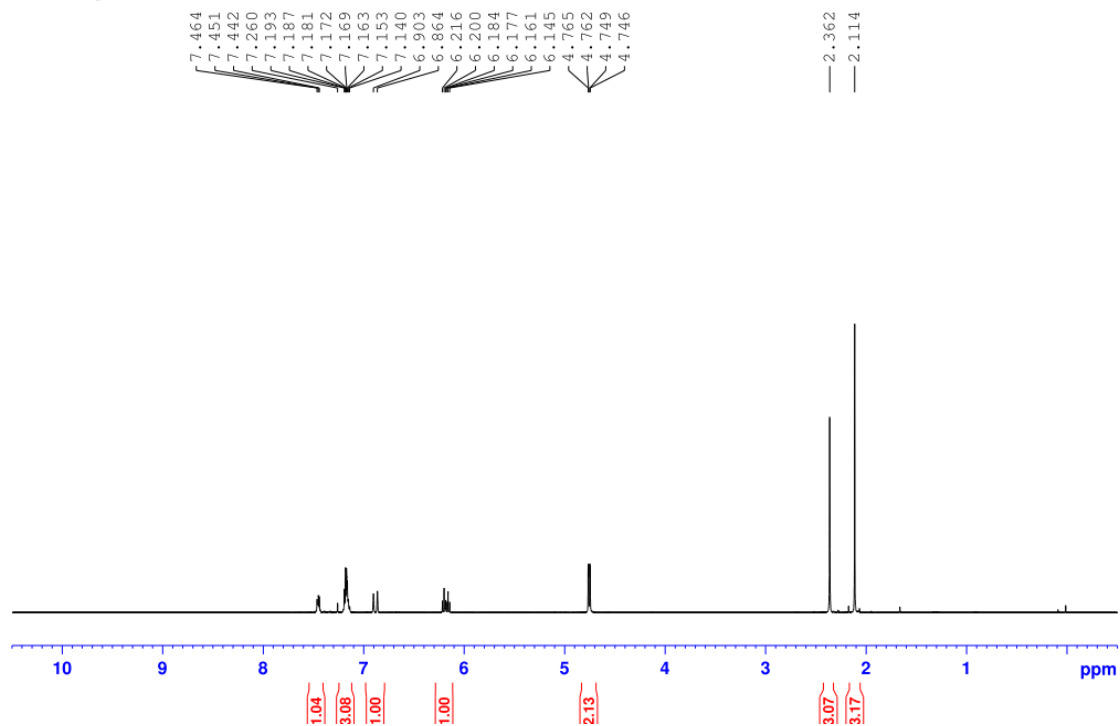

R2-114-1p, BBF01-400Hz,  $^{13}\text{C}$ ,  $\text{cdCl}_3$

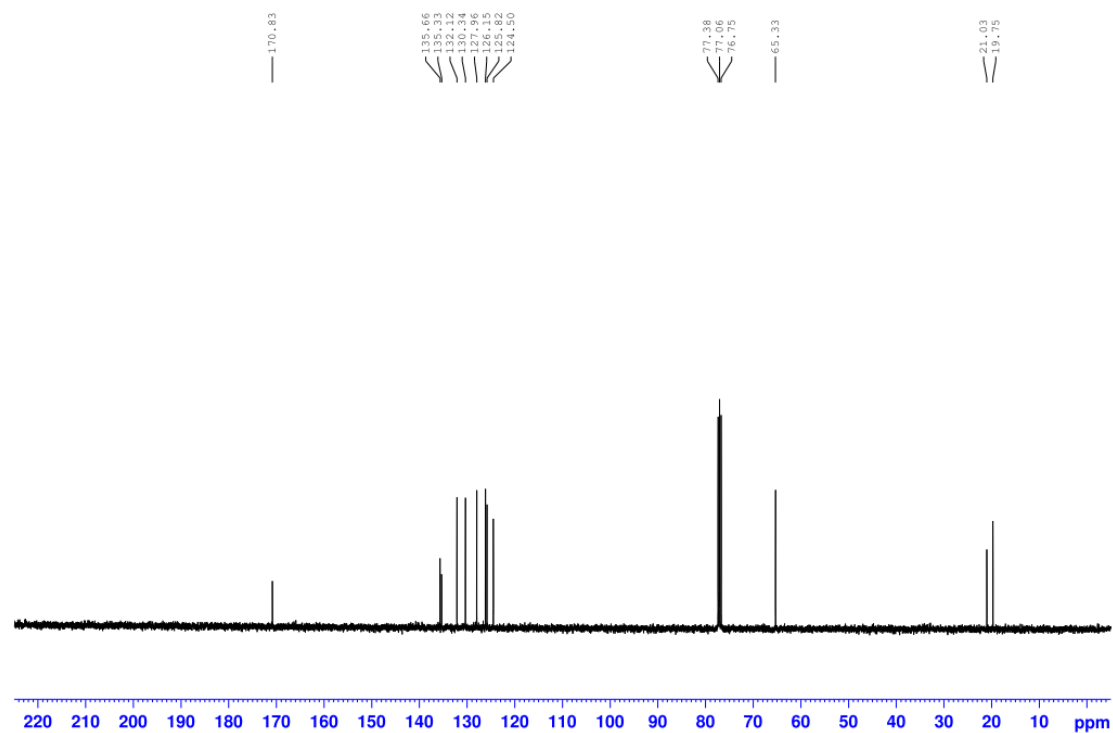

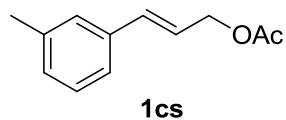

R2-135-1, BBF01-400Hz, 1H, cdcl3

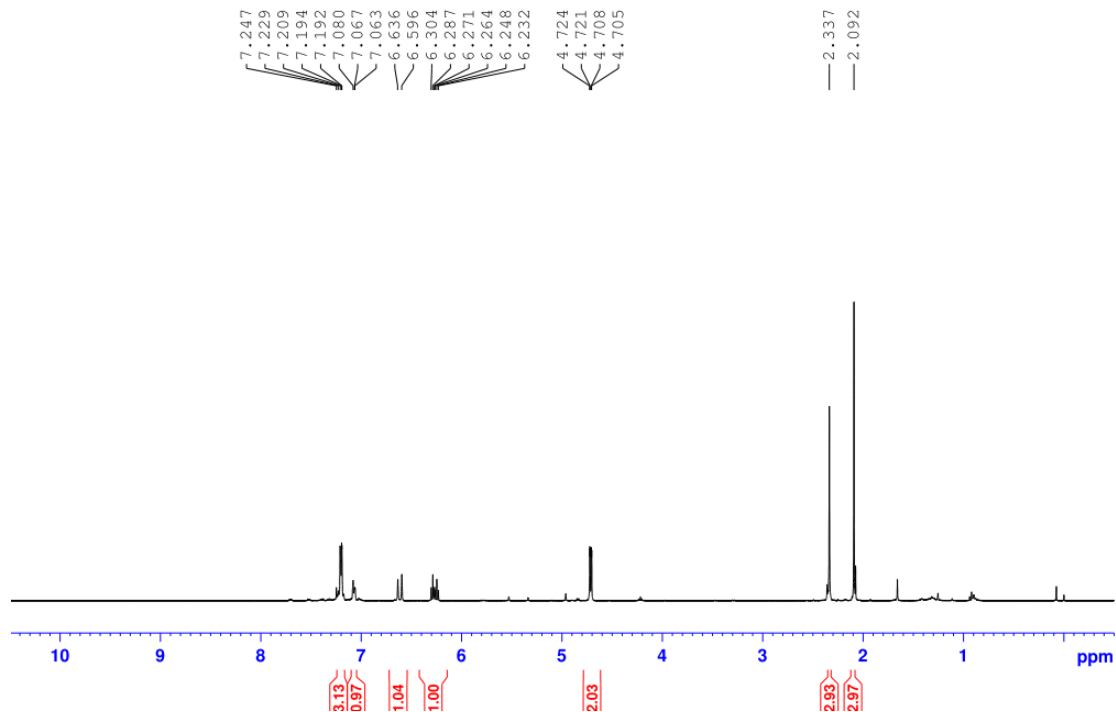

R2-135-1, BBF01-400Hz, 13C, cdcl3

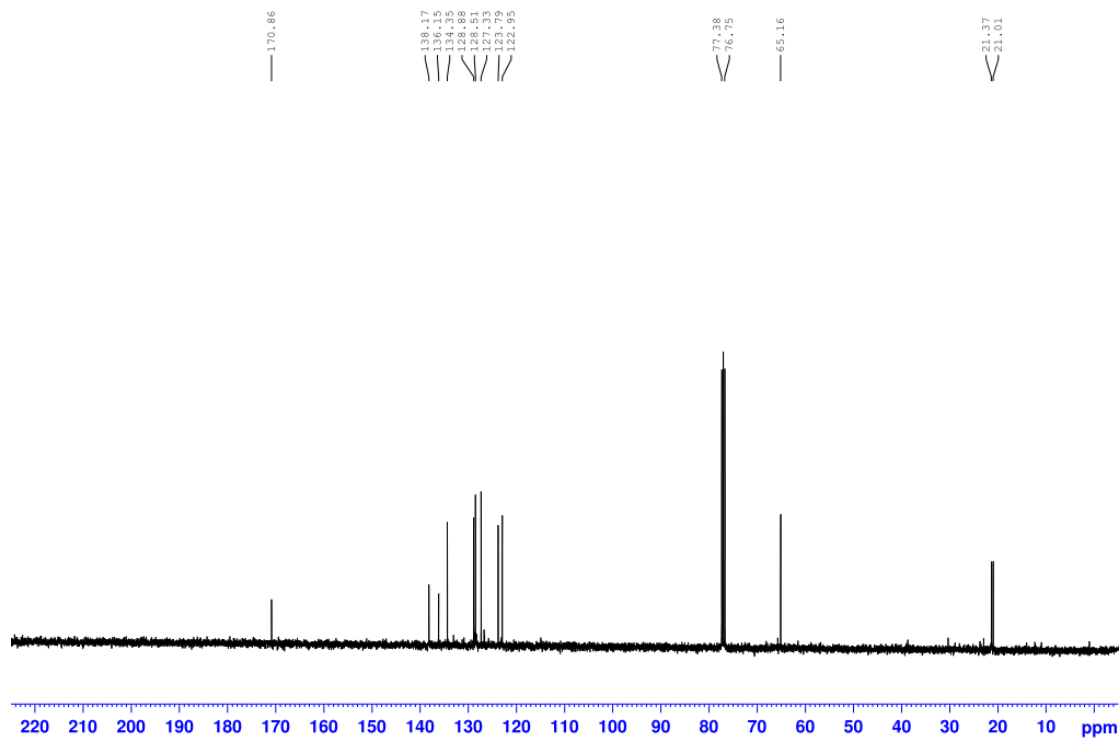

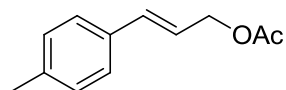

R3010-p, 300 MHz, <sup>1</sup>H NMR, CDCl<sub>3</sub>

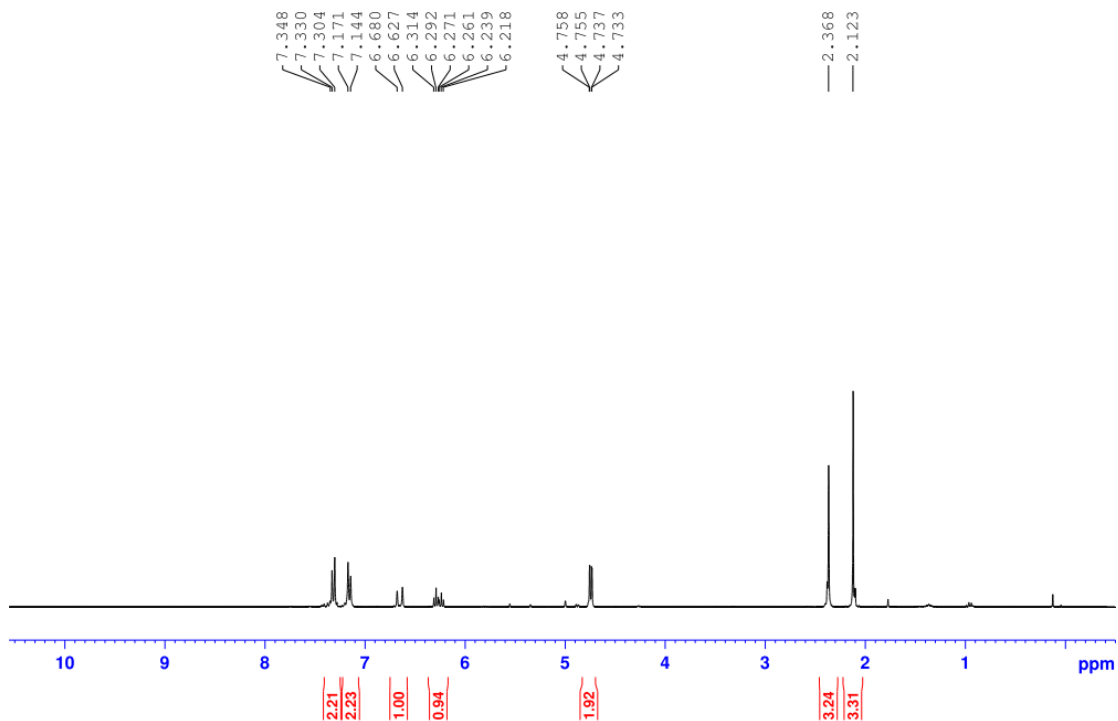

.3010-p, 300 MHz, <sup>13</sup>C NMR, CDCl<sub>3</sub>

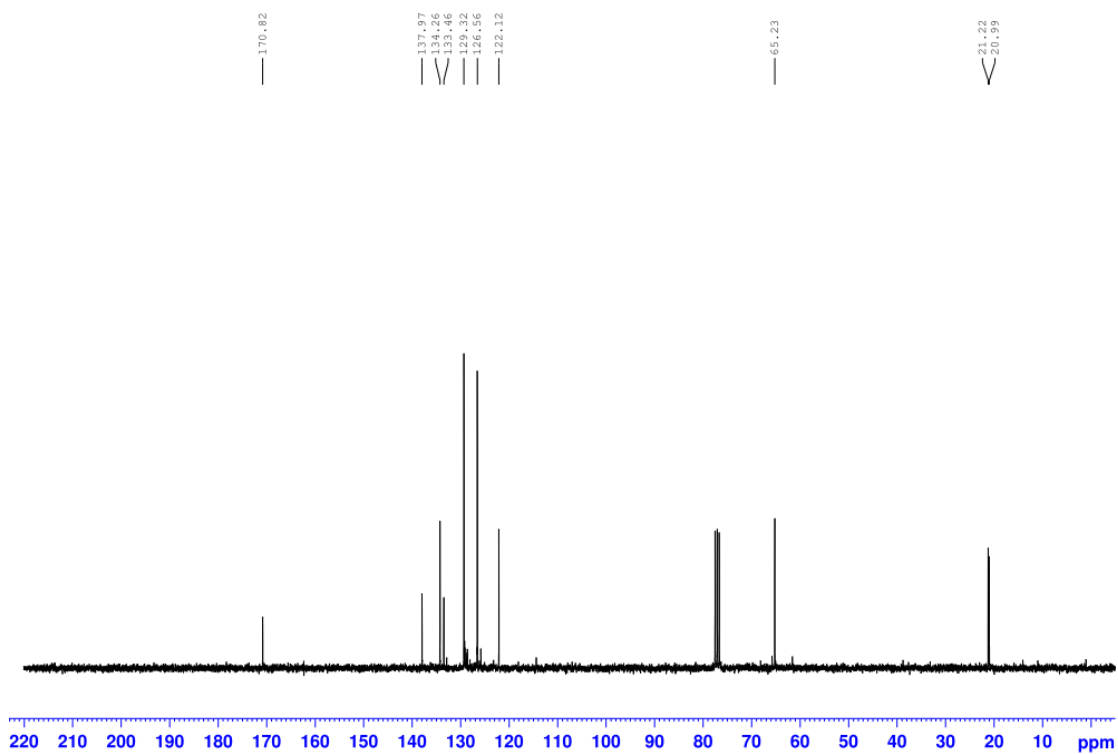

F. Ding et al.

Supporting Information

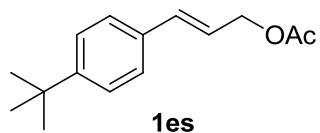

R3014-p, 300 MHz, <sup>1</sup>HNMR, CDCl<sub>3</sub>

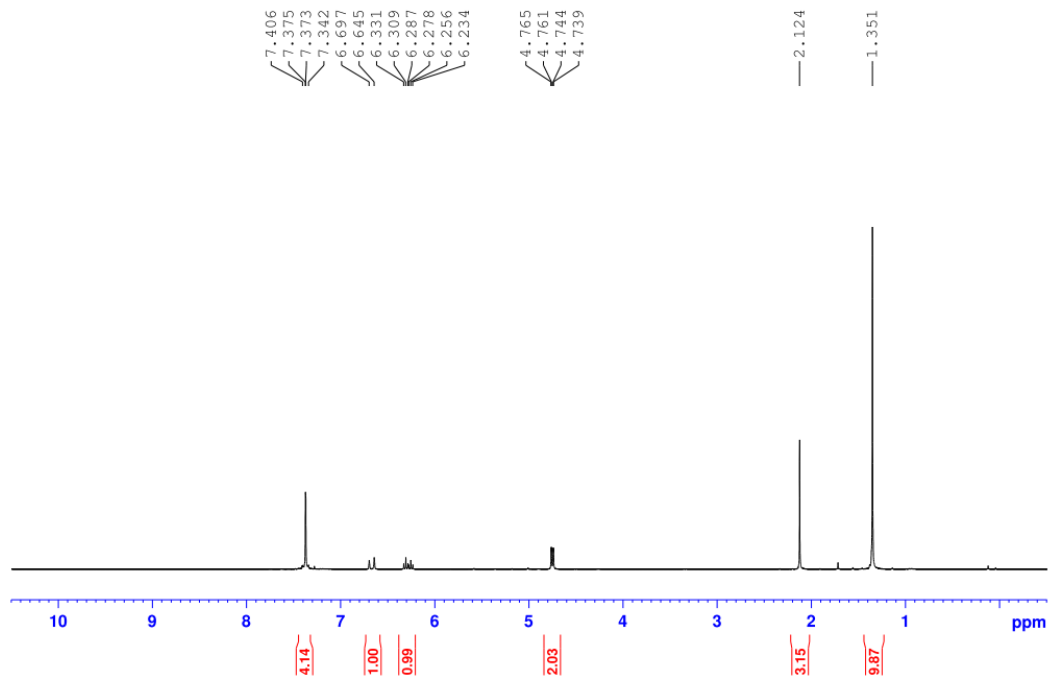

R3014-p, 300 MHz, <sup>13</sup>CNMR, CDCl<sub>3</sub>

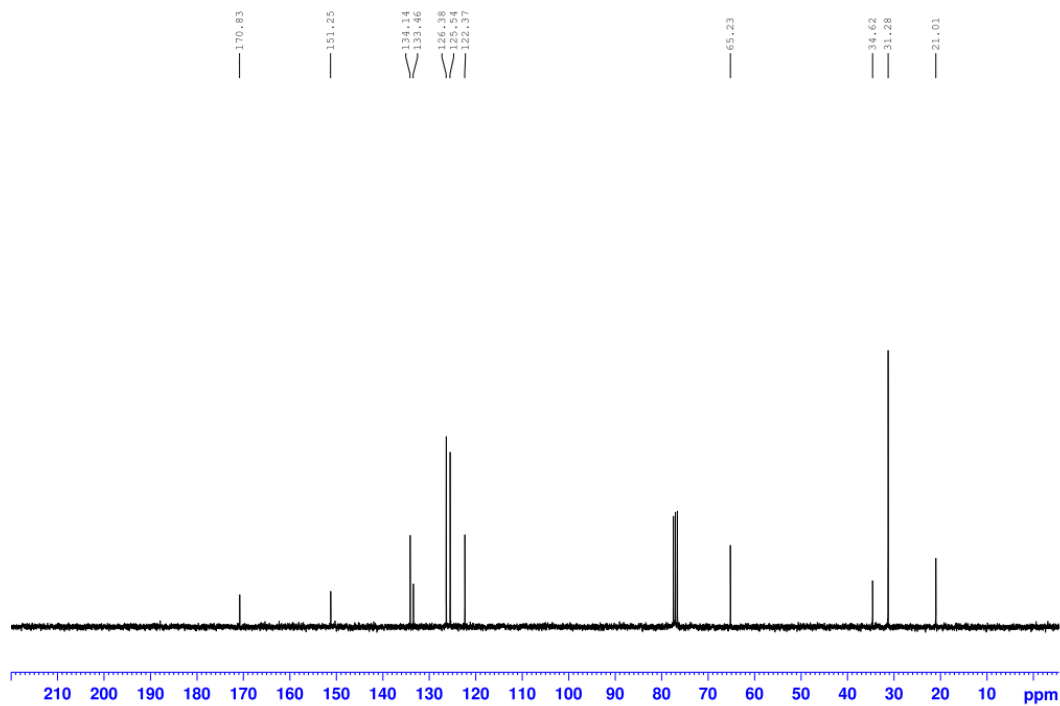



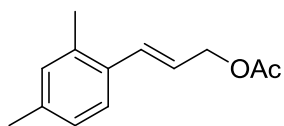

R2-139-1P, BBFO1-400Hz, 1H, cdc13

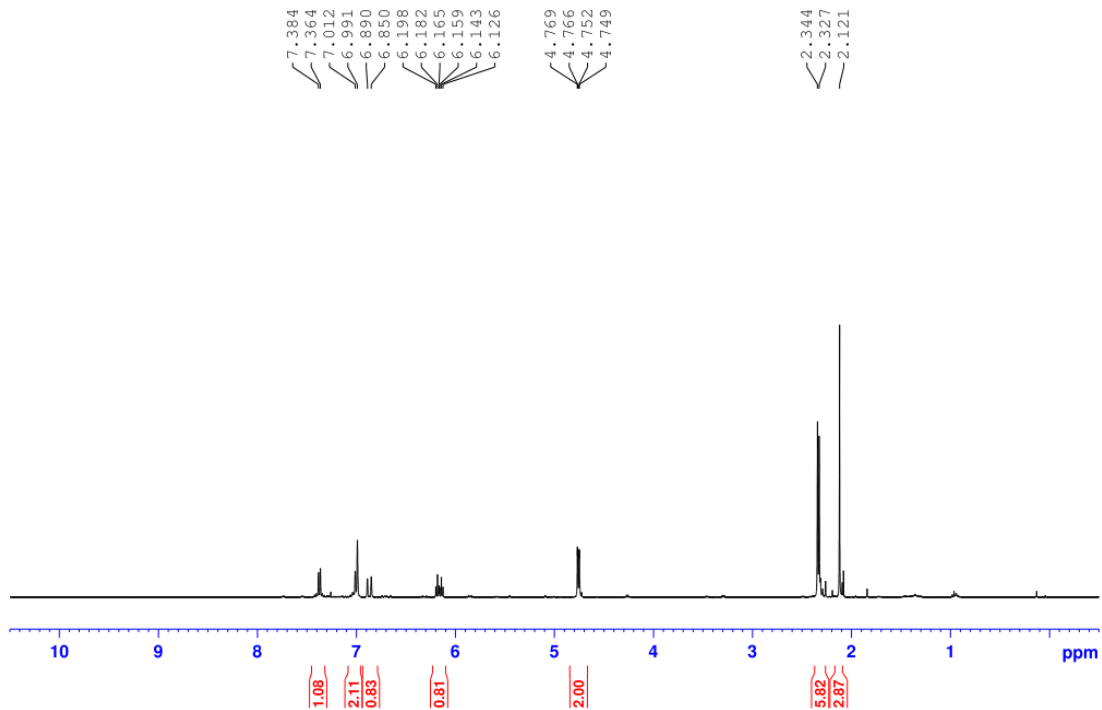

R2-139-1P, BBFO1-400Hz, 13C, cdc13

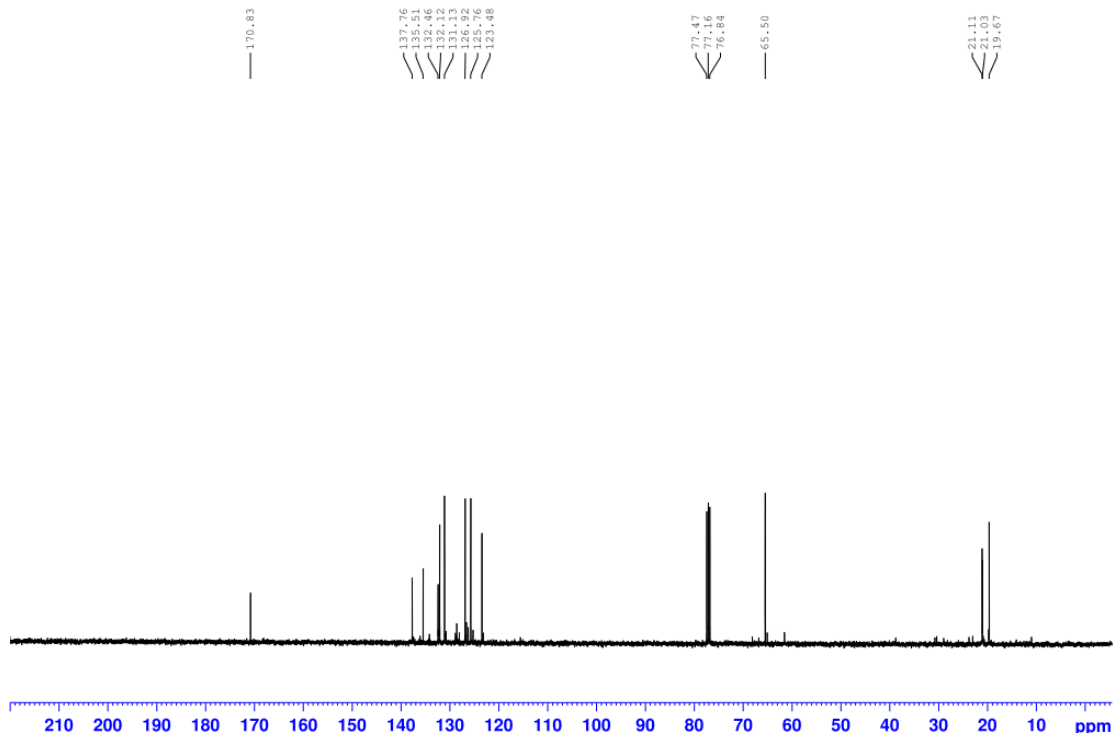

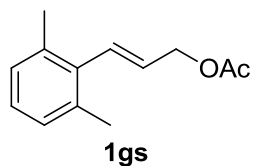

R2-134-1p, HNMR, AV400

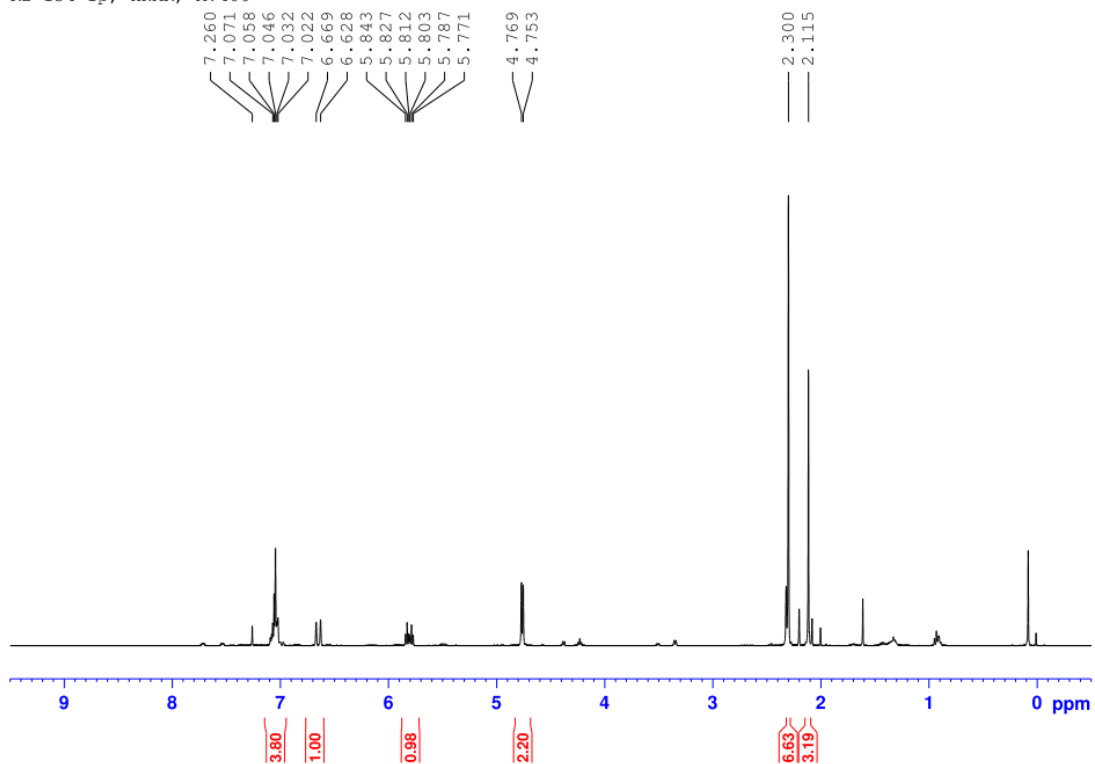

R2-134-1p, <sup>13</sup>C NMR, AV400

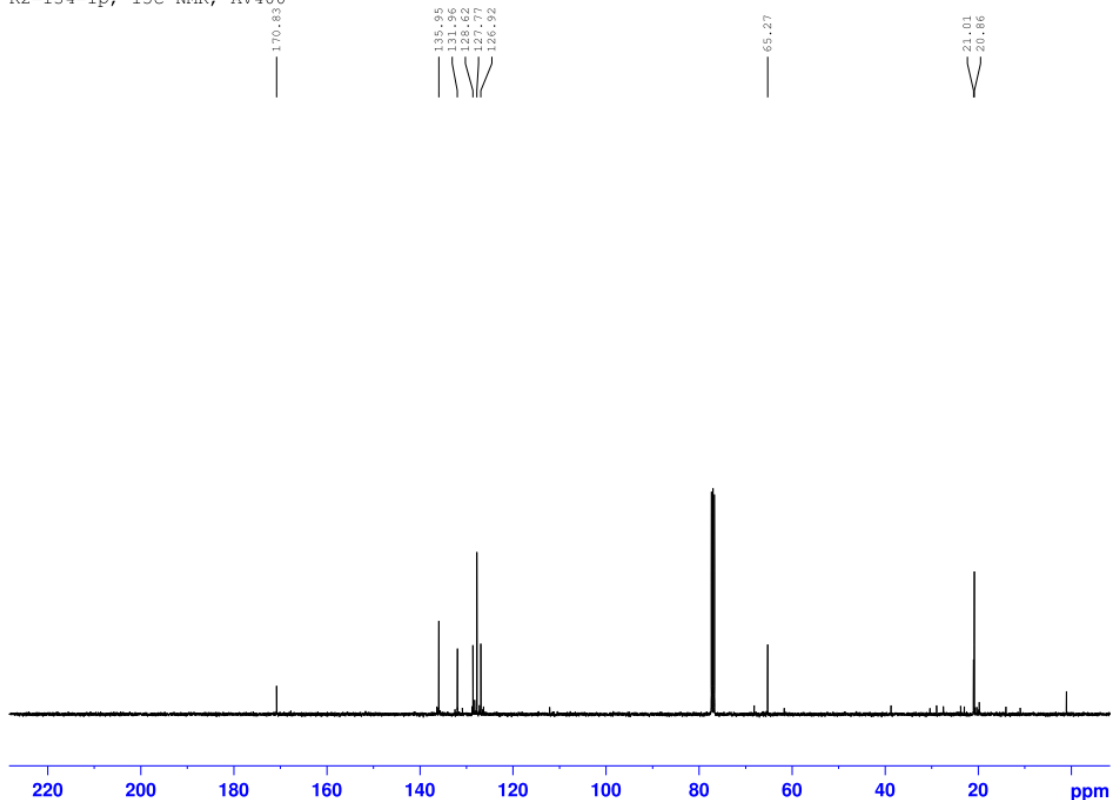

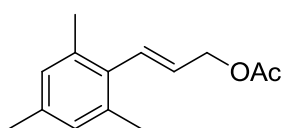

**1hs**

R2-140-1P, BBF01-400Hz, 1H, cdc13

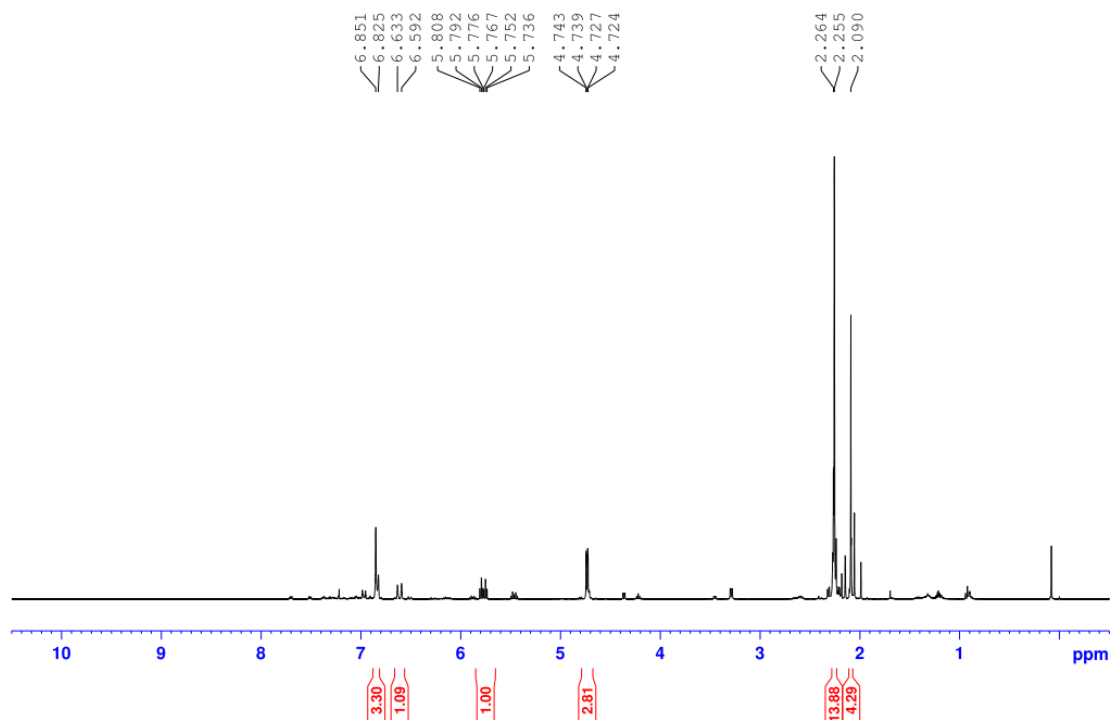

R2-140-1P, BBF01-400Hz, 13C, cdc13

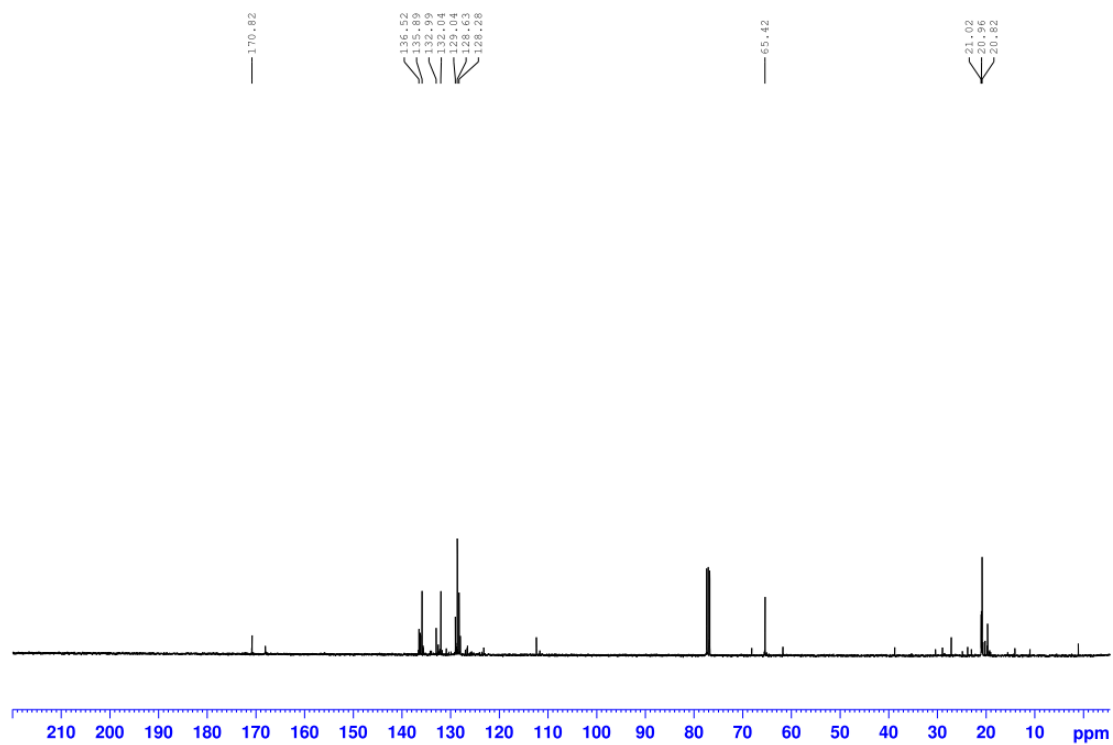

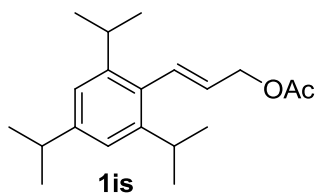

R3-019-1p, <sup>1</sup>H, Bruker 400 BBF01, CDCl<sub>3</sub>

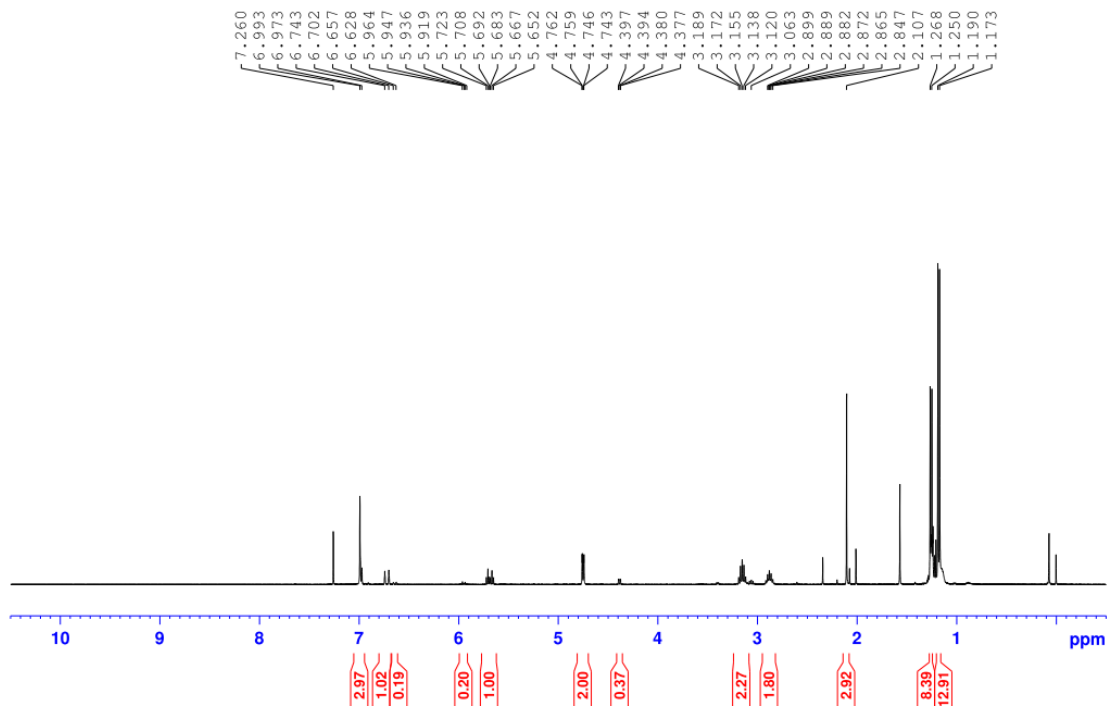

R3-019-1p, <sup>13</sup>C, Bruker 400 BBF01, CDCl<sub>3</sub>

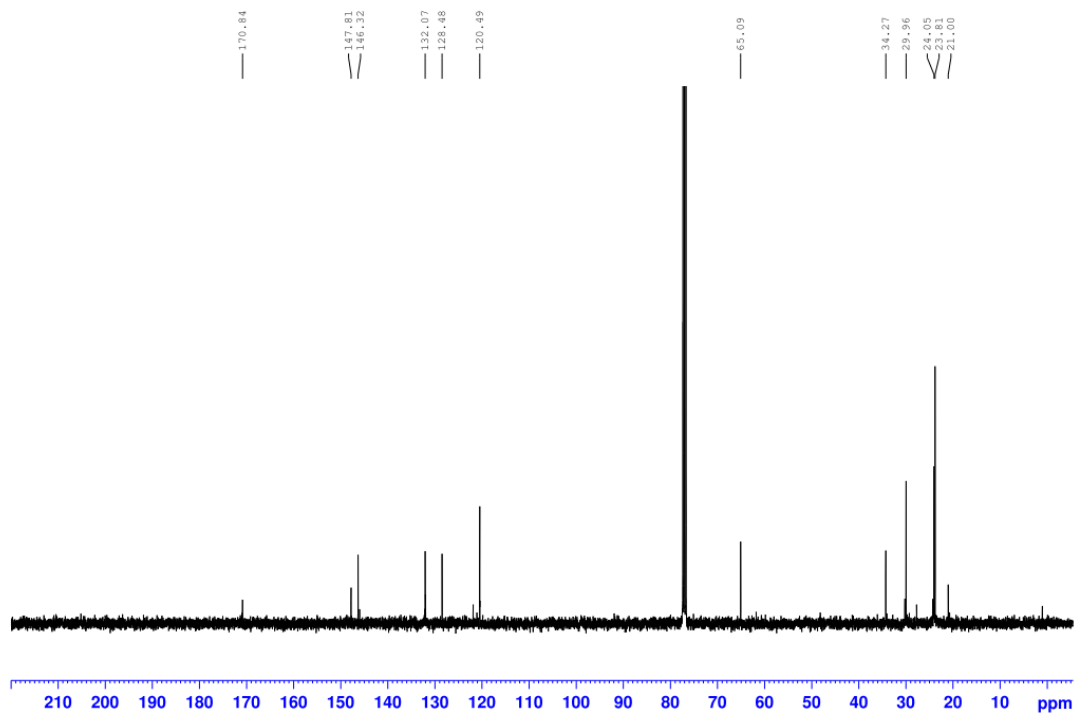

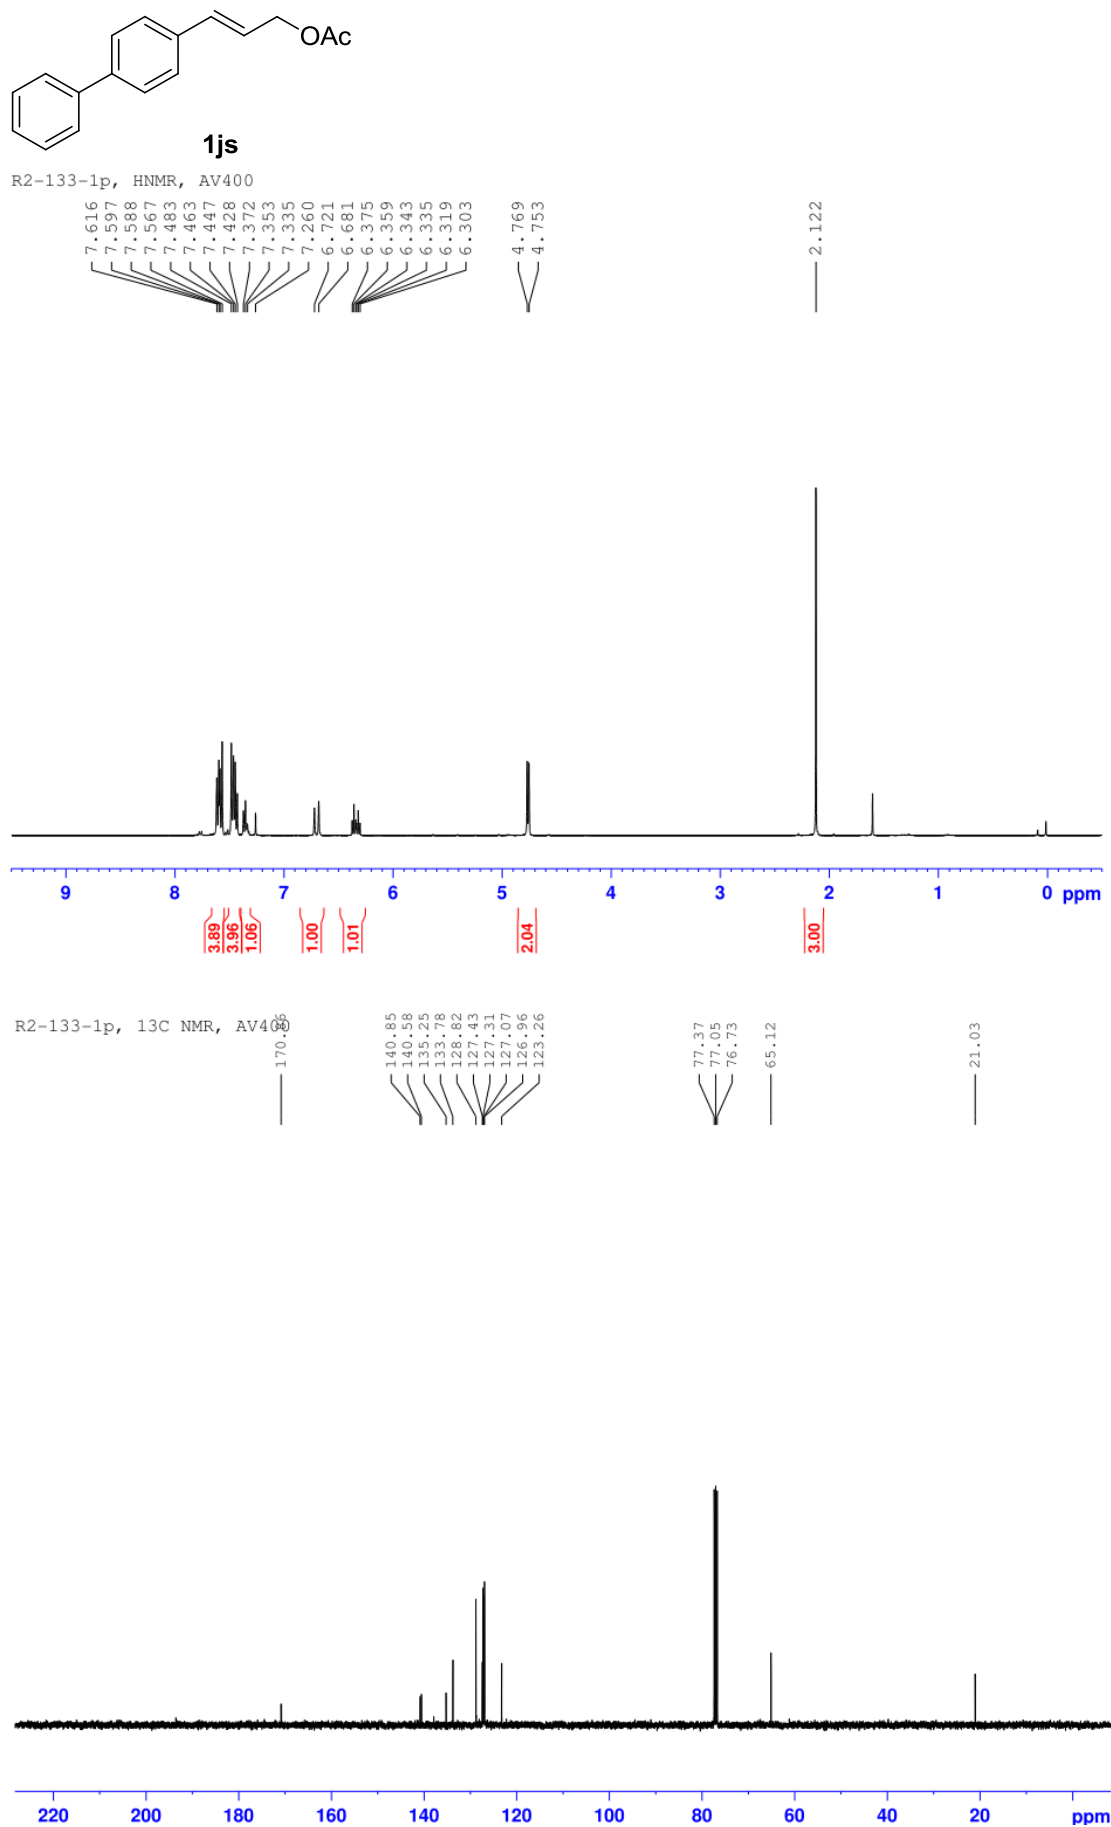

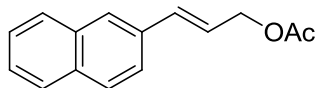

**1ks**

R2-142-1P, BBFO1-400Hz, 1H, cdcl3

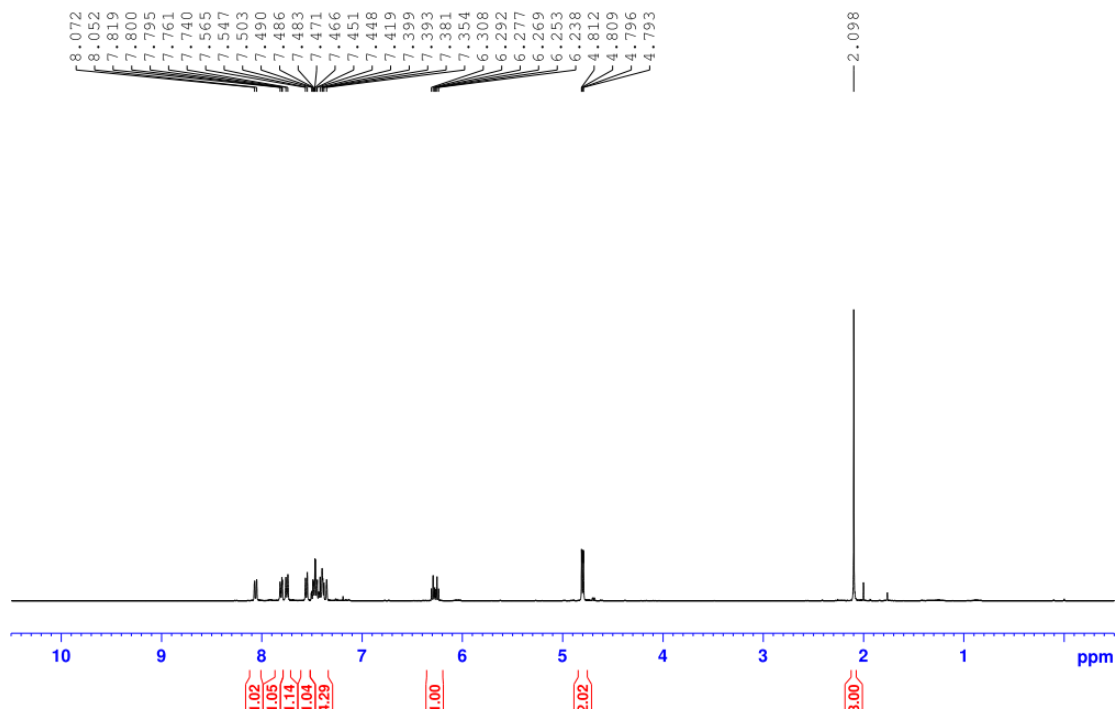

R2-142-1P, BBFO1-400Hz, 13C, cdcl3

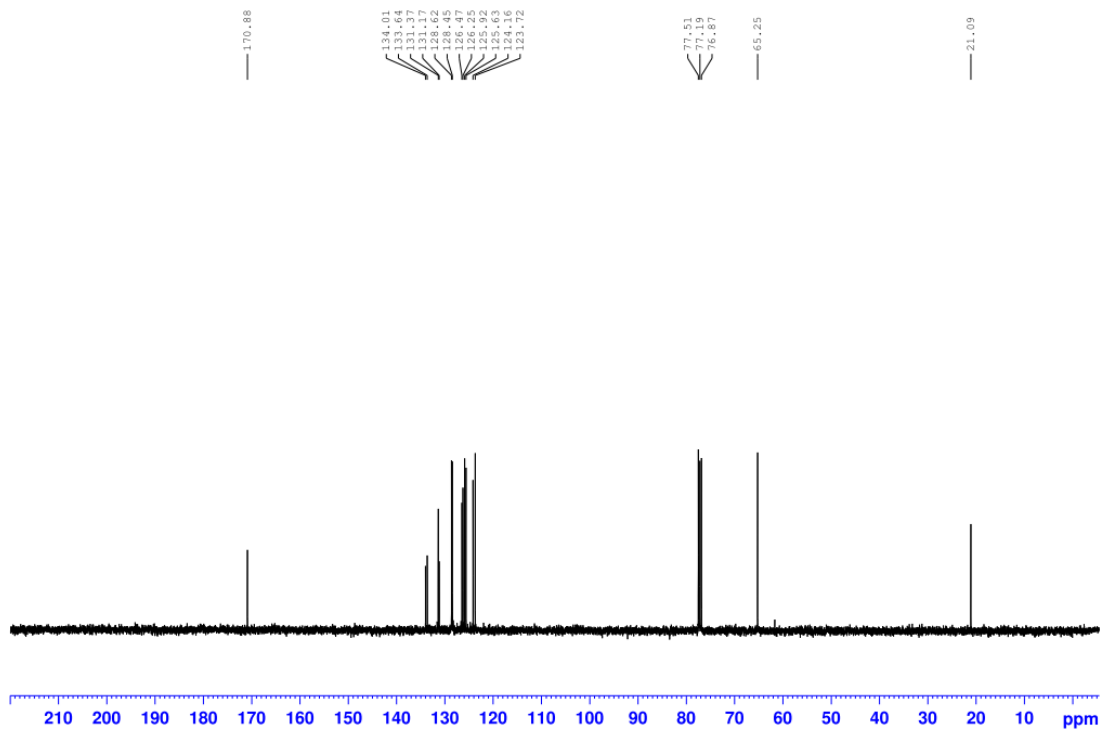

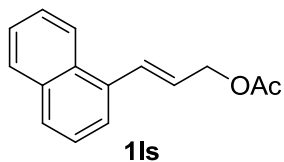

R3015-p, 300 MHz, <sup>1</sup>HNMR, CDCl<sub>3</sub>

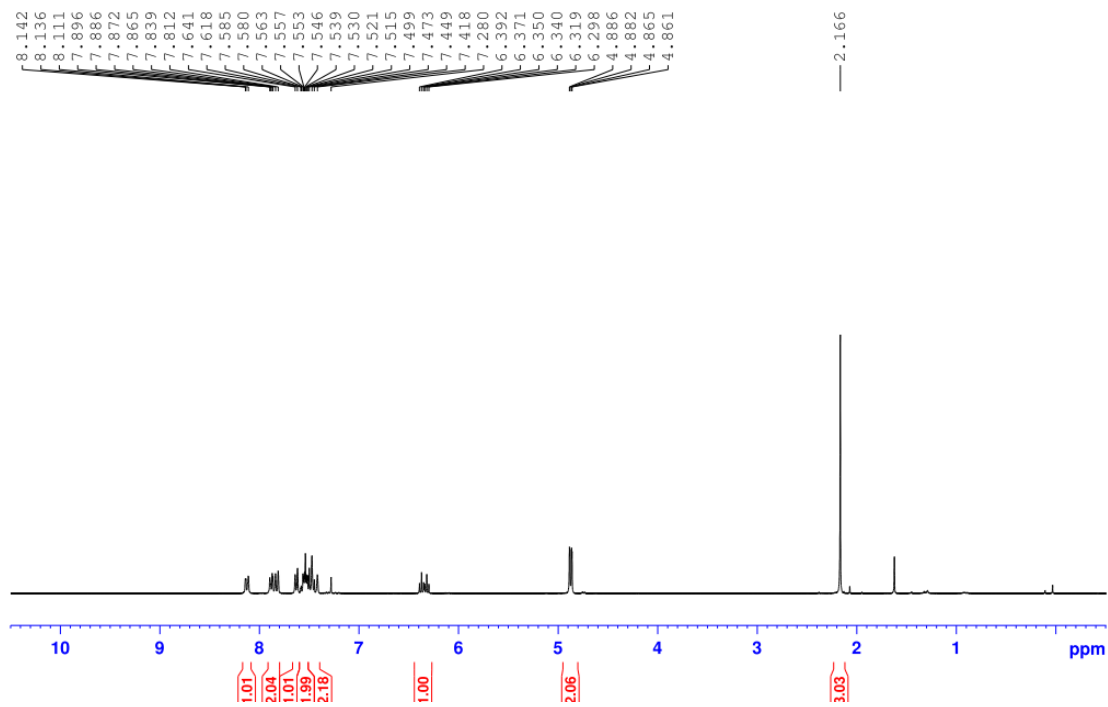

R3015-p, 300 MHz, <sup>13</sup>CNMR, CDCl<sub>3</sub>

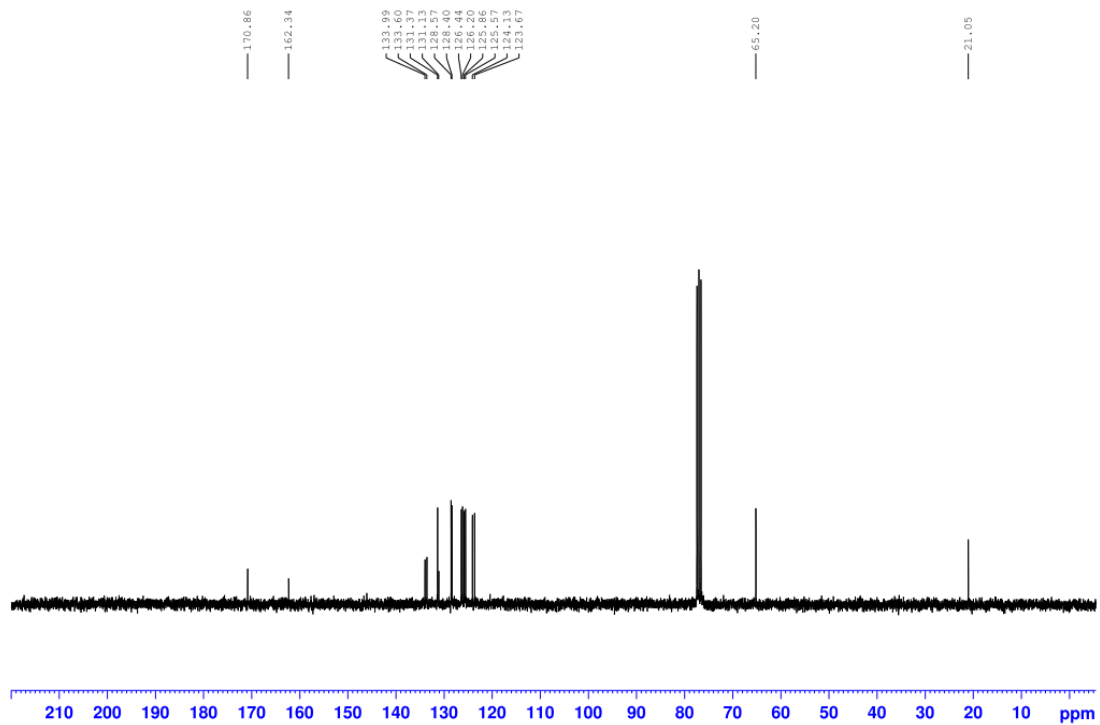

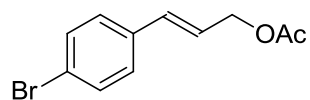

1ms

R2-148-1P, BBFO1-400Hz, 1H, cdcl3

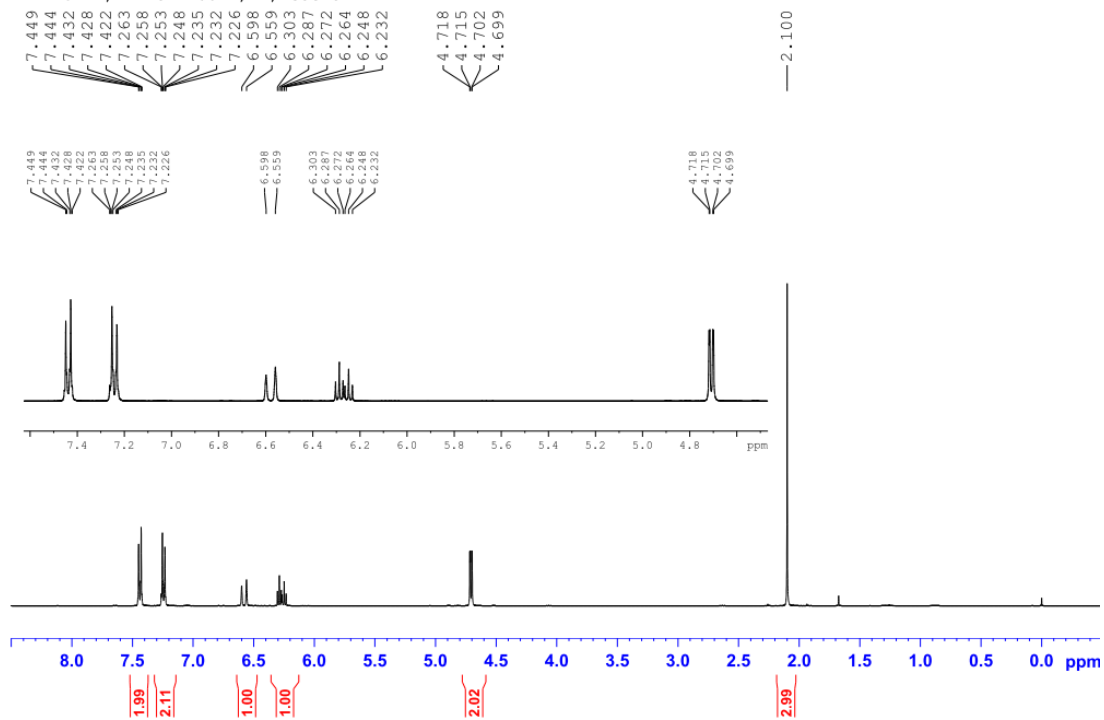

R2-148-1P, BBFO1-400Hz, 13C, cdcl3

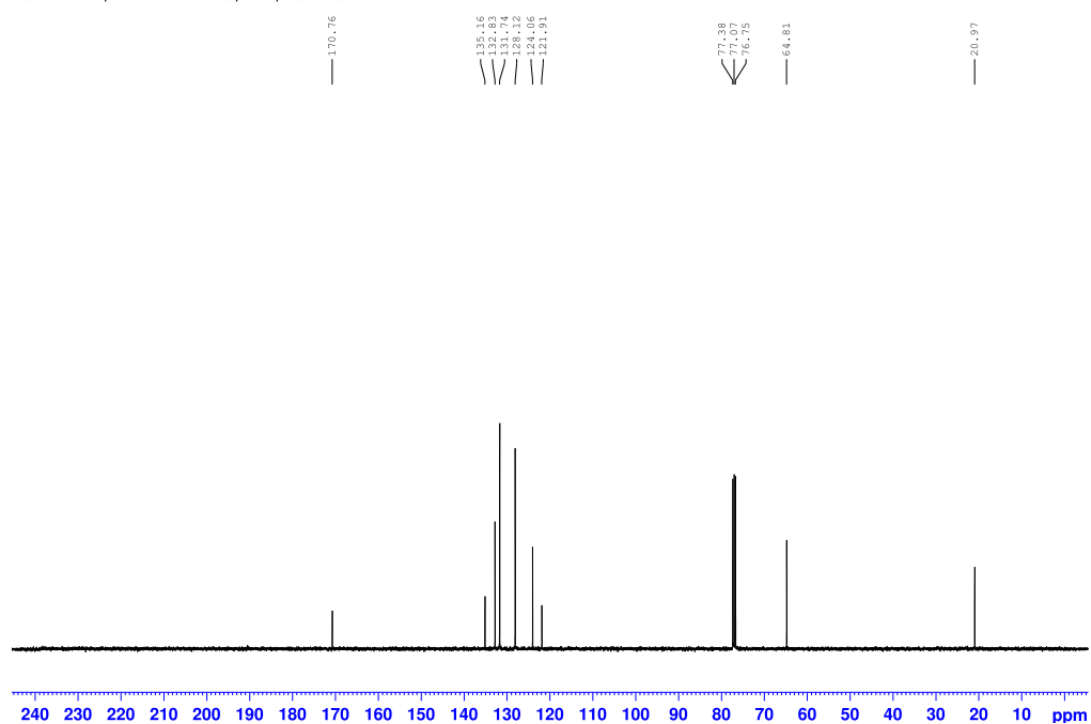



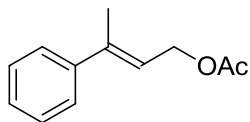

**1ns**

R3038-p, <sup>1</sup>HNMR, CDCL<sub>3</sub>, 300 MHz

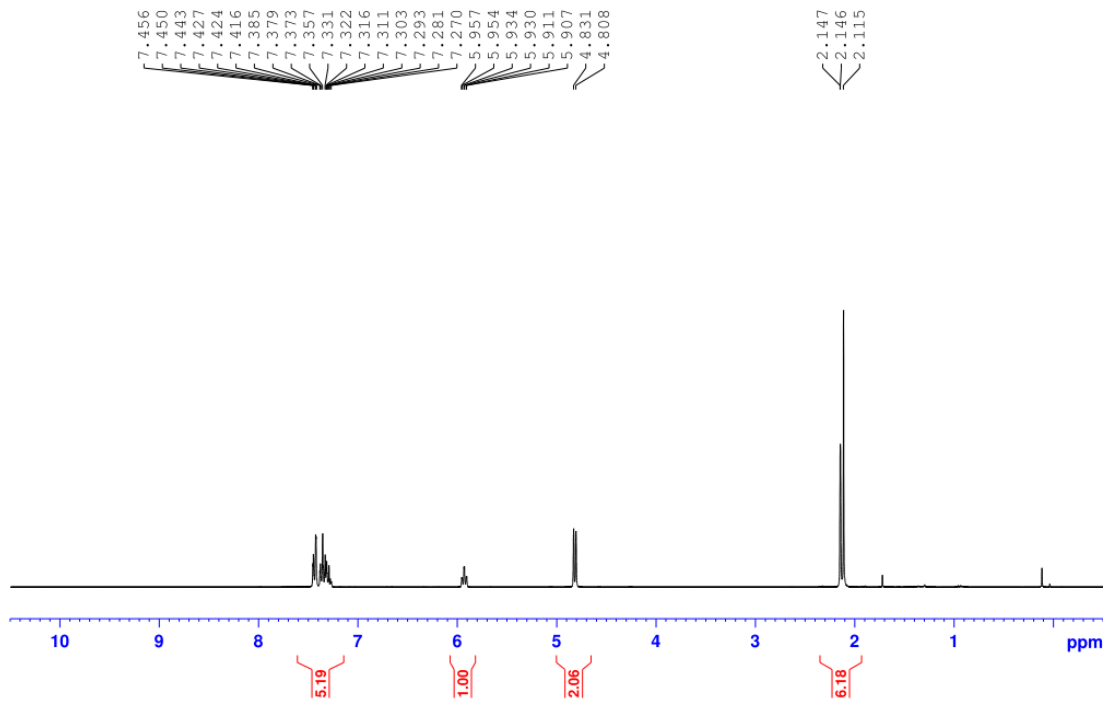

R3038-p, <sup>13</sup>CNMR, CDCL<sub>3</sub>, 300 MHz

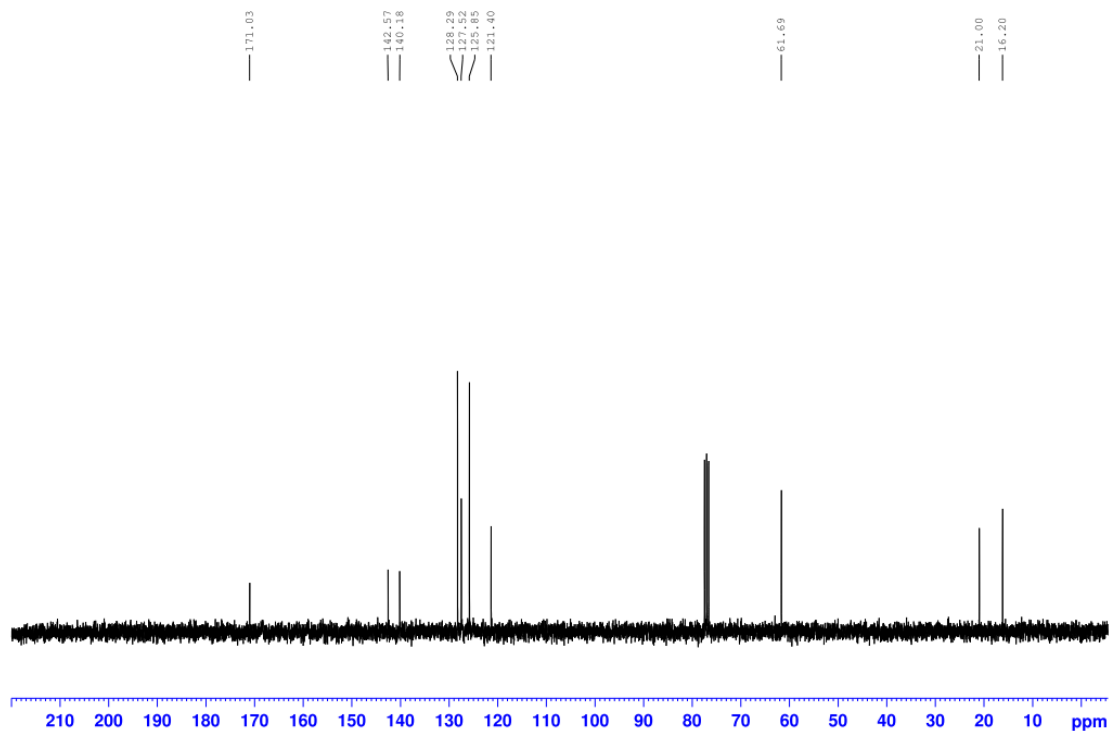

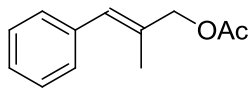

**1os**

R2-147-1P, BBFO1-400Hz, 1H, cdcl3

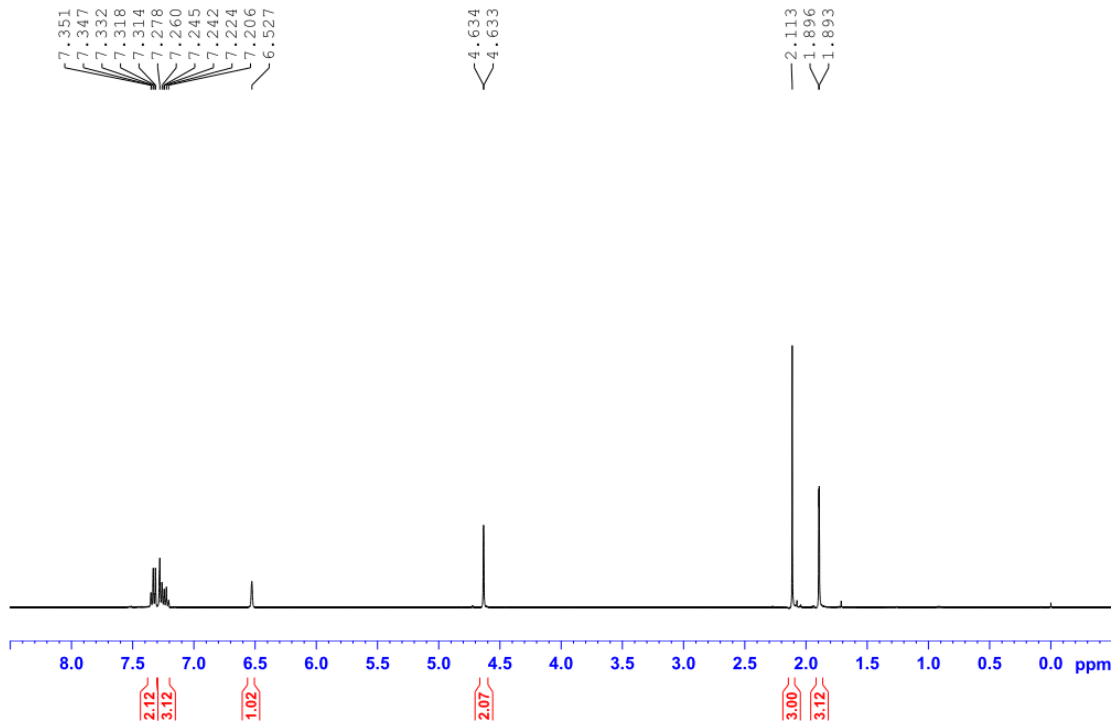

R2-147-1P, BBFO1-400Hz, 13C, cdcl3

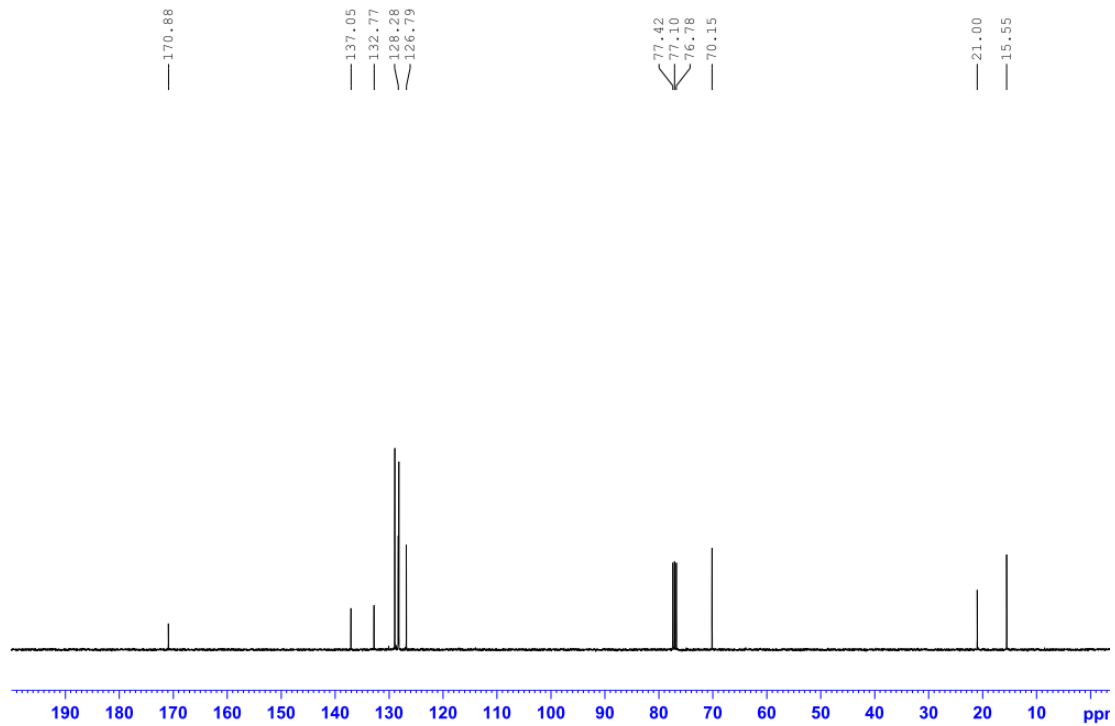

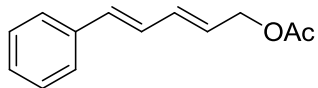

**1ps**

D2-106-1p, <sup>1</sup>H NMR, AV400MHz, CDCl<sub>3</sub>

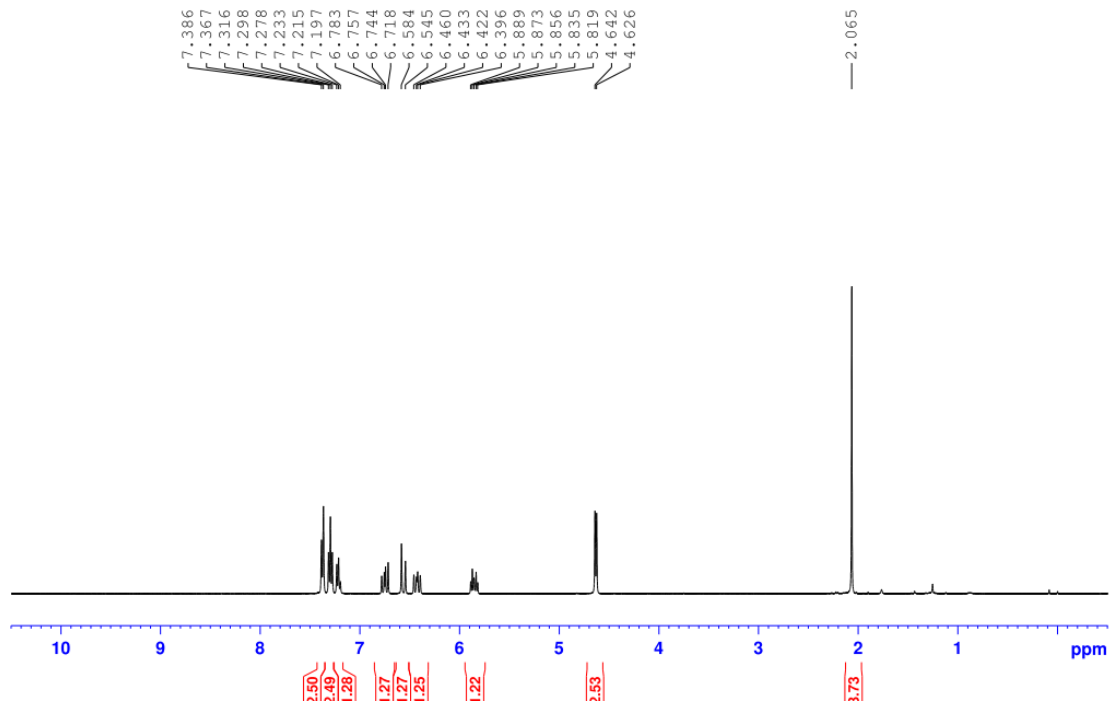

D2-106-1p, <sup>13</sup>C NMR, AV400MHz, CDCl<sub>3</sub>

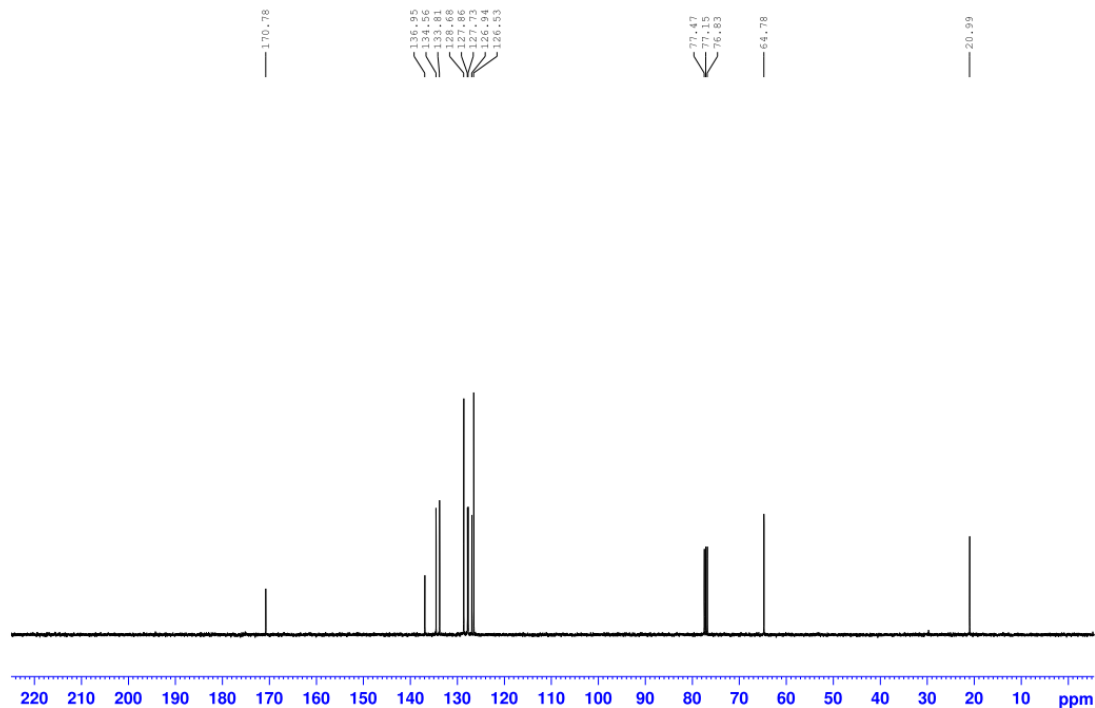

F. Ding et al.

Supporting Information

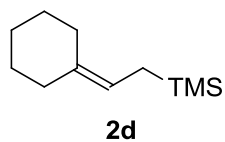

R3036-1p, <sup>1</sup>HNMR, CDCL<sub>3</sub>, 300 MHz

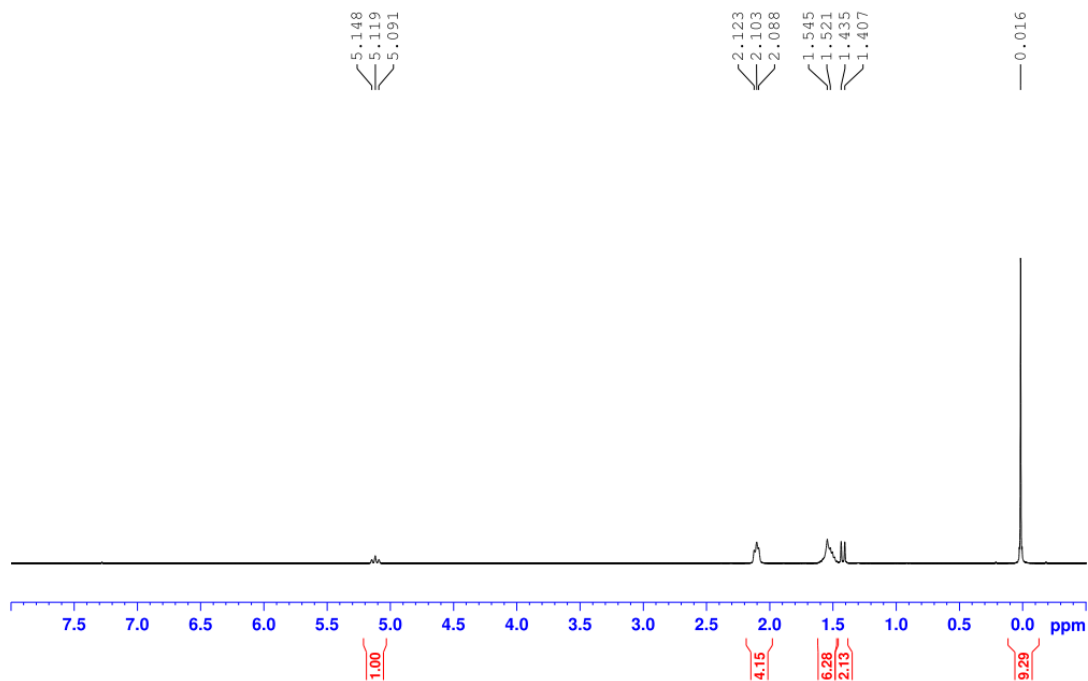

R3036-1p, <sup>13</sup>CNMR, CDCL<sub>3</sub>, 300 MHz

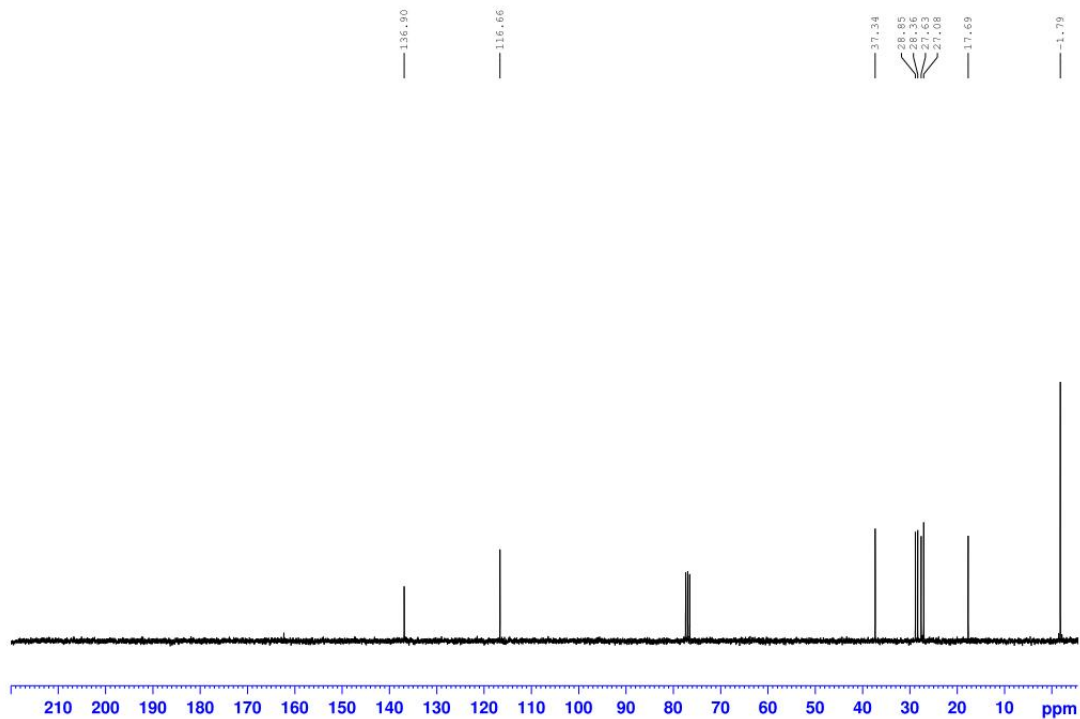

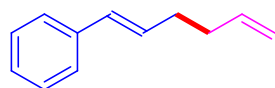

3a

D2-067-1, CDCl<sub>3</sub>, 400Mz, HNMR, bbf1,

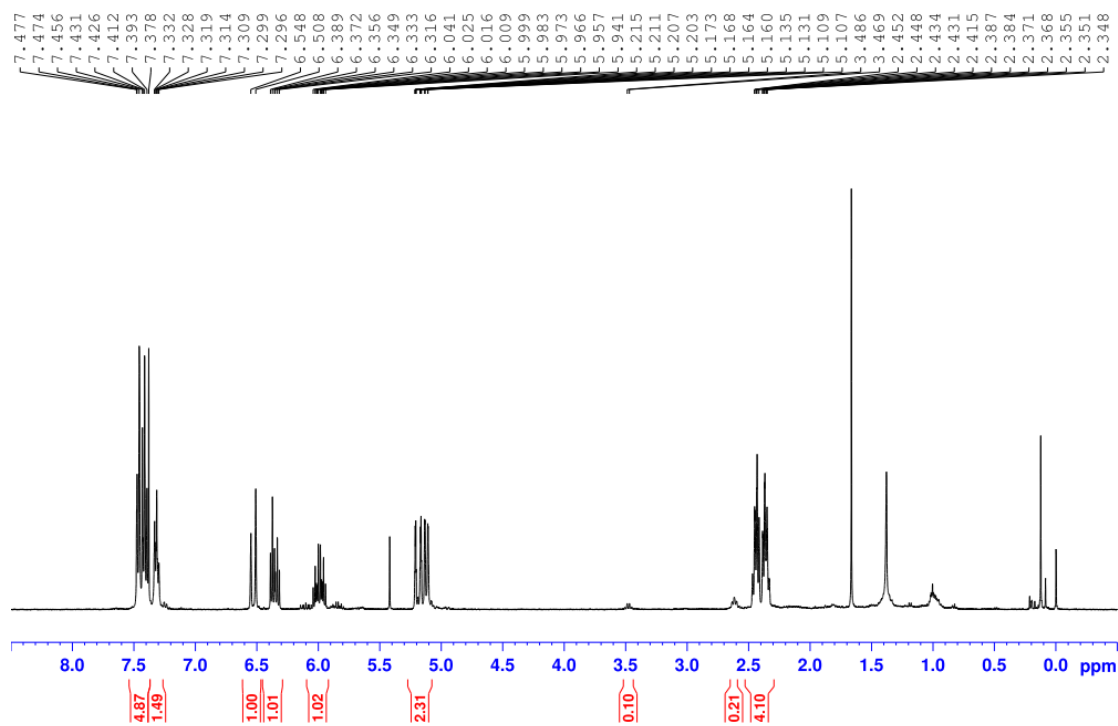

D2-067-1p, CDCl<sub>3</sub>, AV400, <sup>13</sup>C NMR, AUG-2011

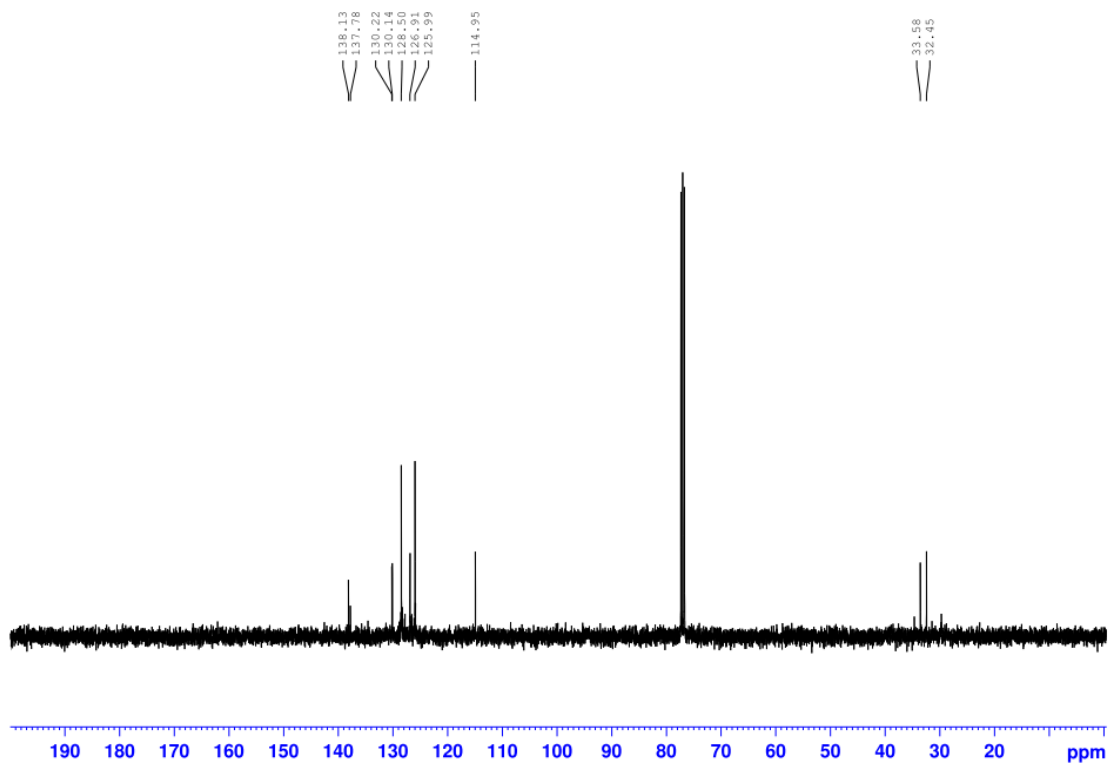

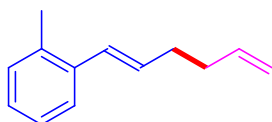

**3b**

R2-130-1p, <sup>1</sup>H NMR, AV400, CDCl<sub>3</sub>

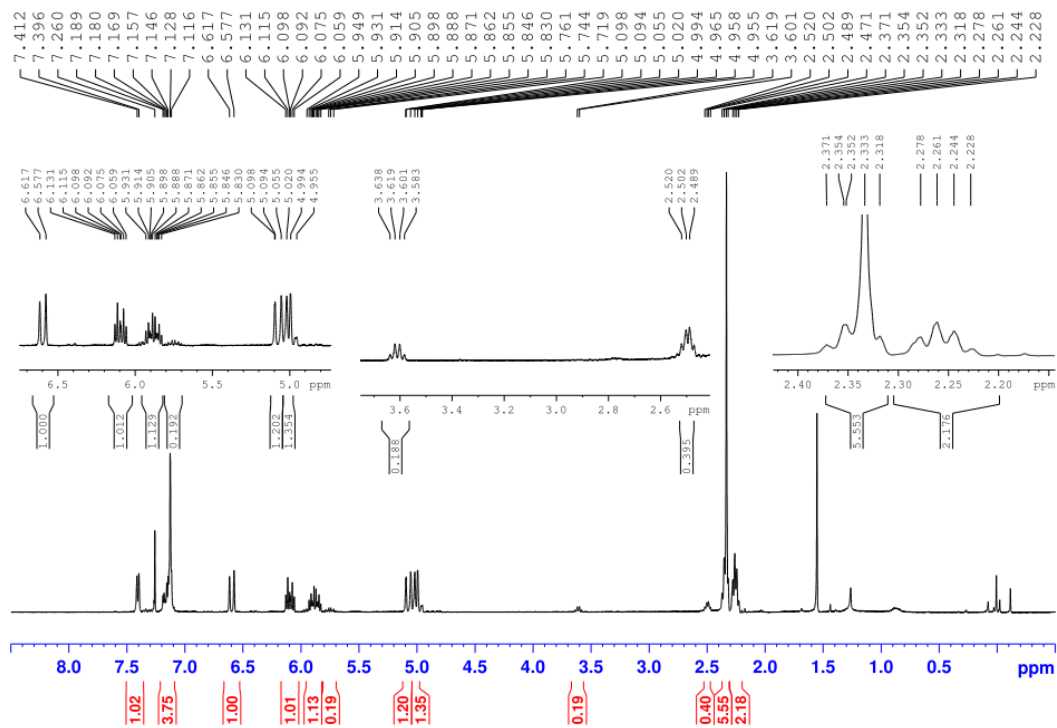

R2-130-1p, <sup>13</sup>C NMR, AV400, CDCl<sub>3</sub>

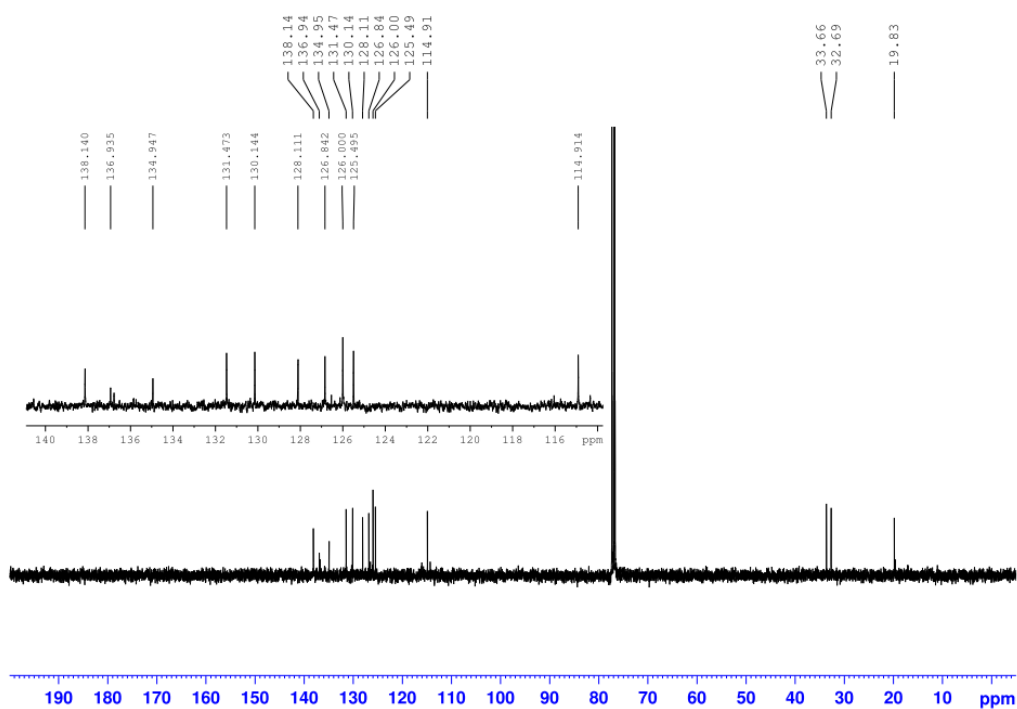

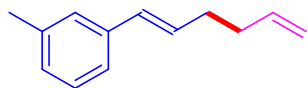

3c

W1-060-1, 400MHz(BBFO2), 1H NMR, CDCl3

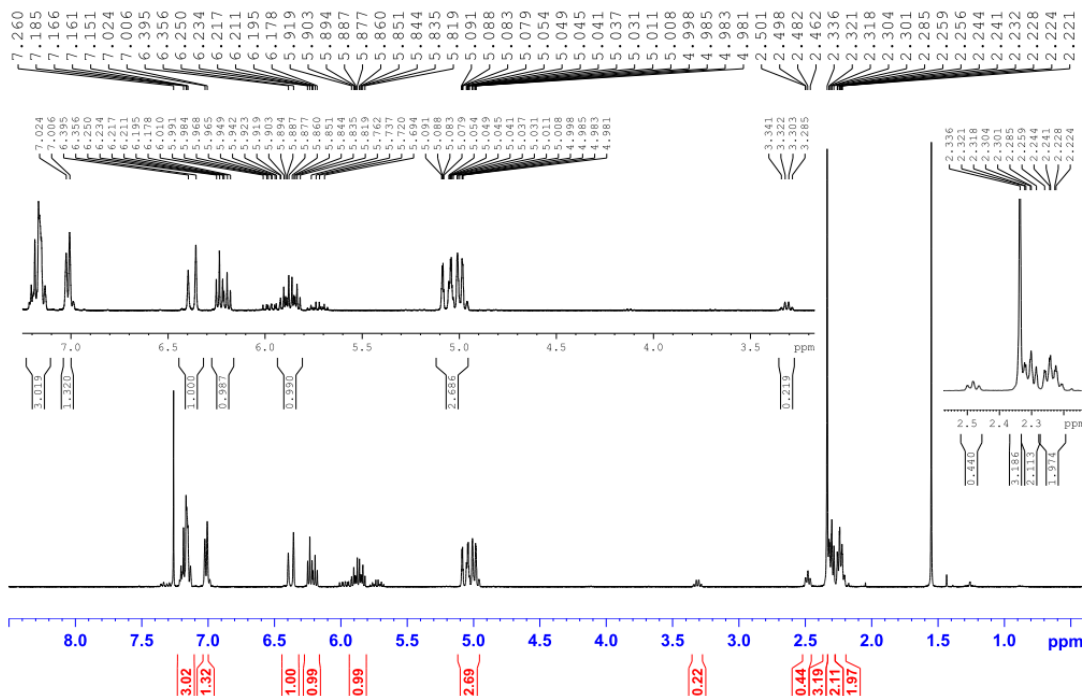

W1-060-1, 400MHz(BBFO2), 13C NMR, CDCl3

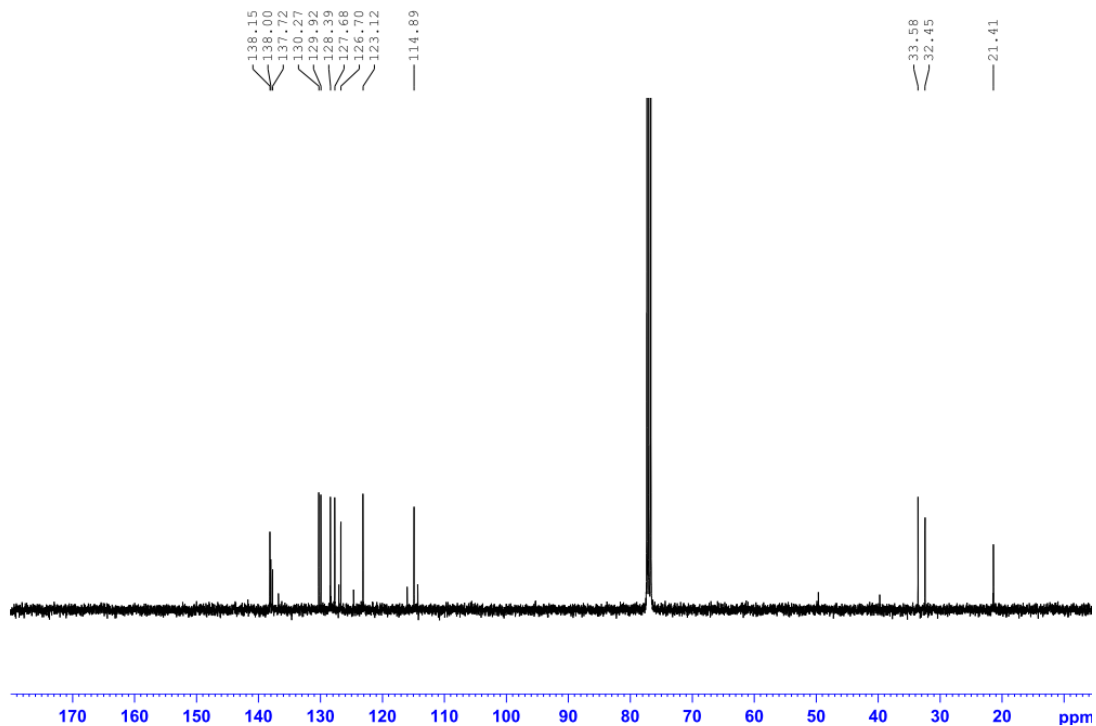

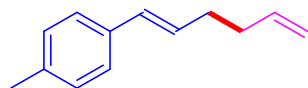

3d

R3-011-1, 1H, Bruker 400 BBF01, CDCl<sub>3</sub>

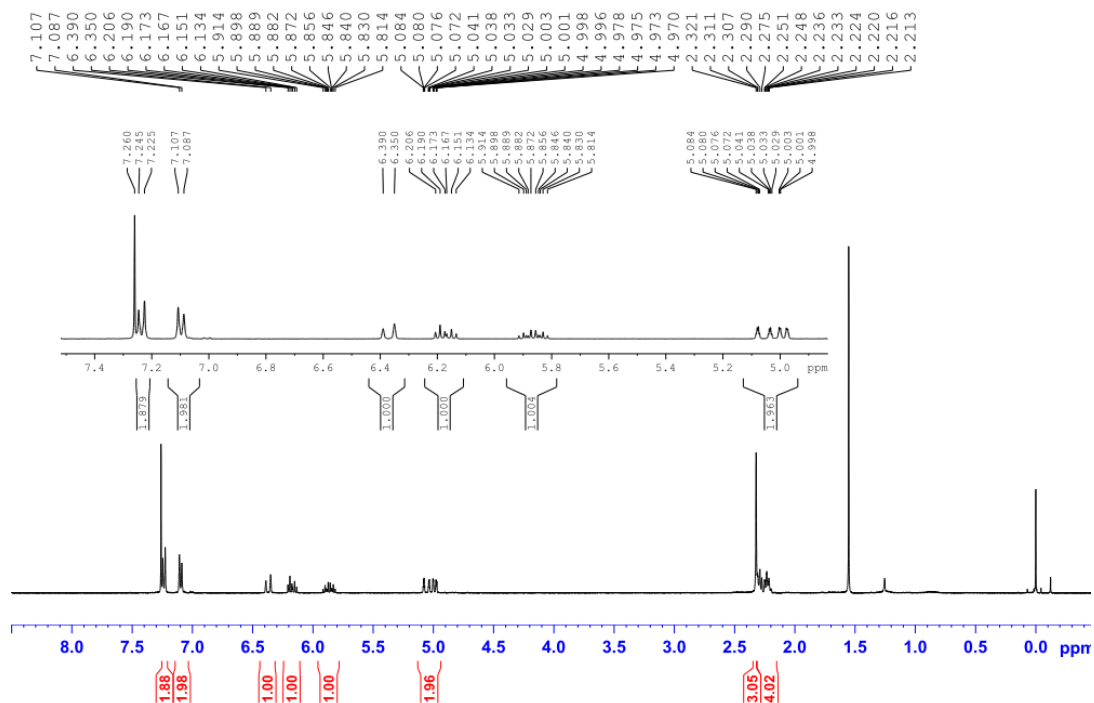

R3-011-1, 13C, Bruker 400 BBF01, CDCl<sub>3</sub>

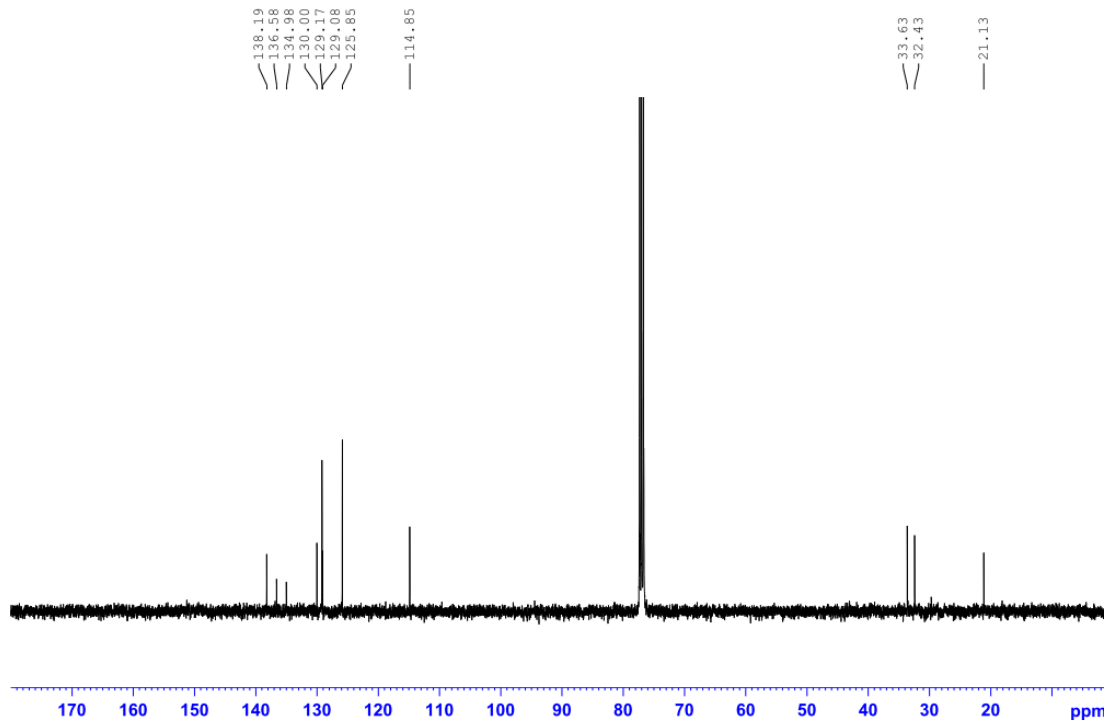



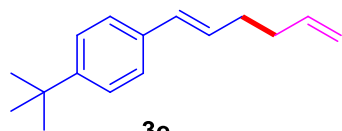

R3016-p, 300 MHz, <sup>1</sup>HNMR, CDCl<sub>3</sub>

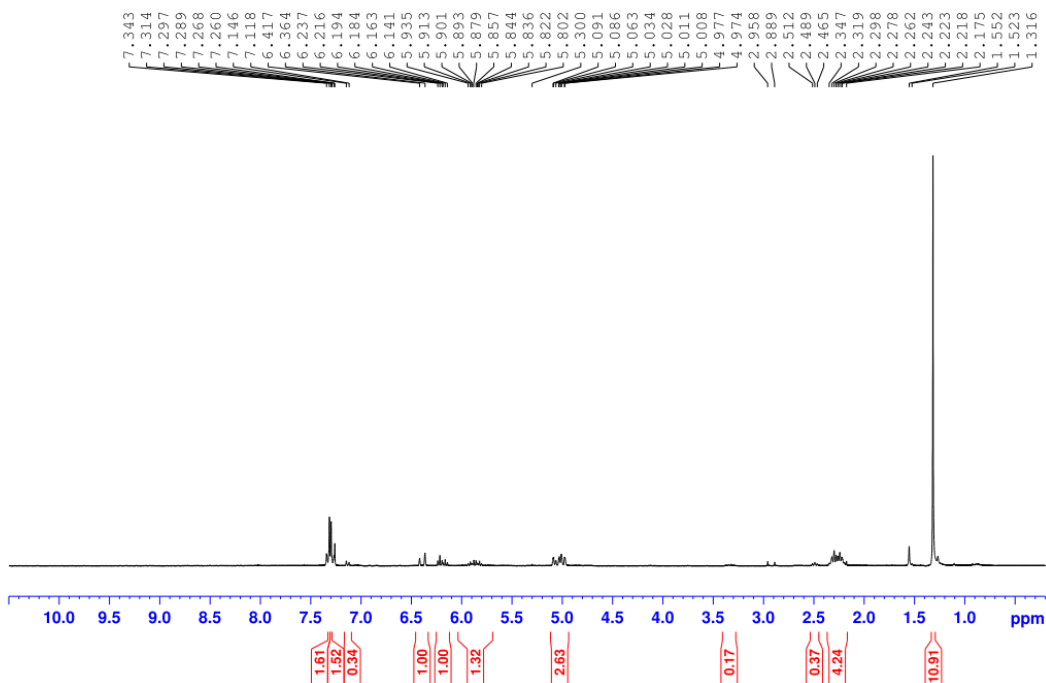

R3016-p, 300 MHz, <sup>13</sup>CNMR, CDCl<sub>3</sub>

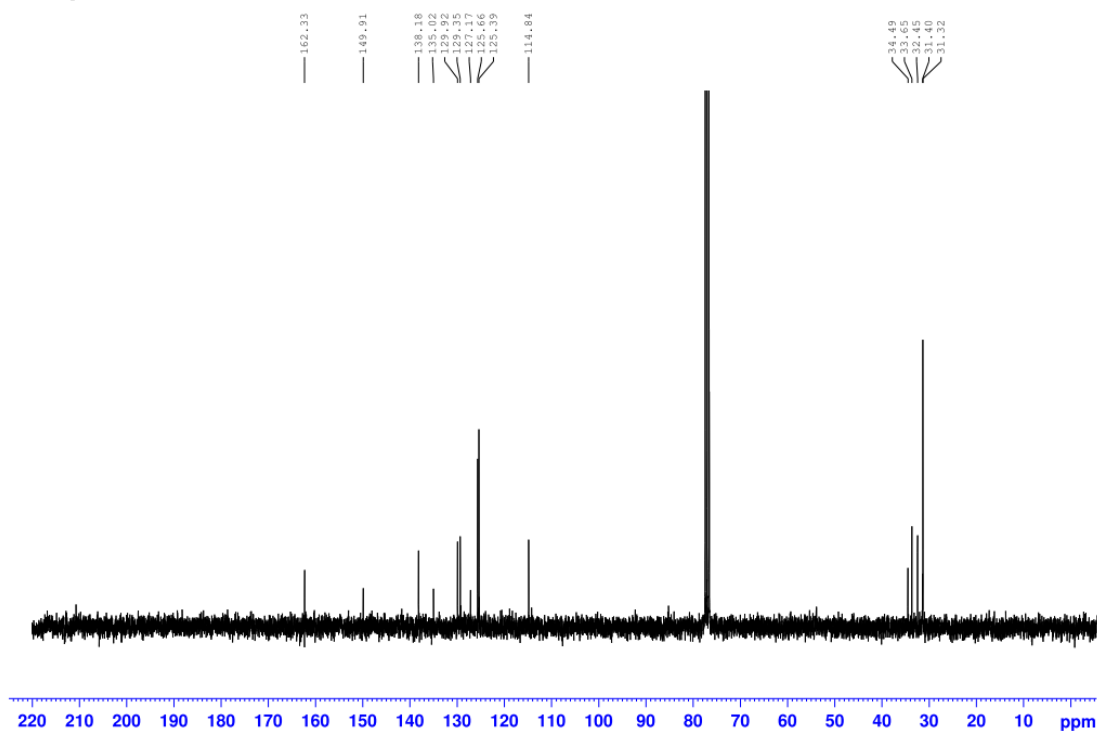

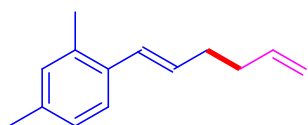

3f

R2-143-1p, HNMR, AV400

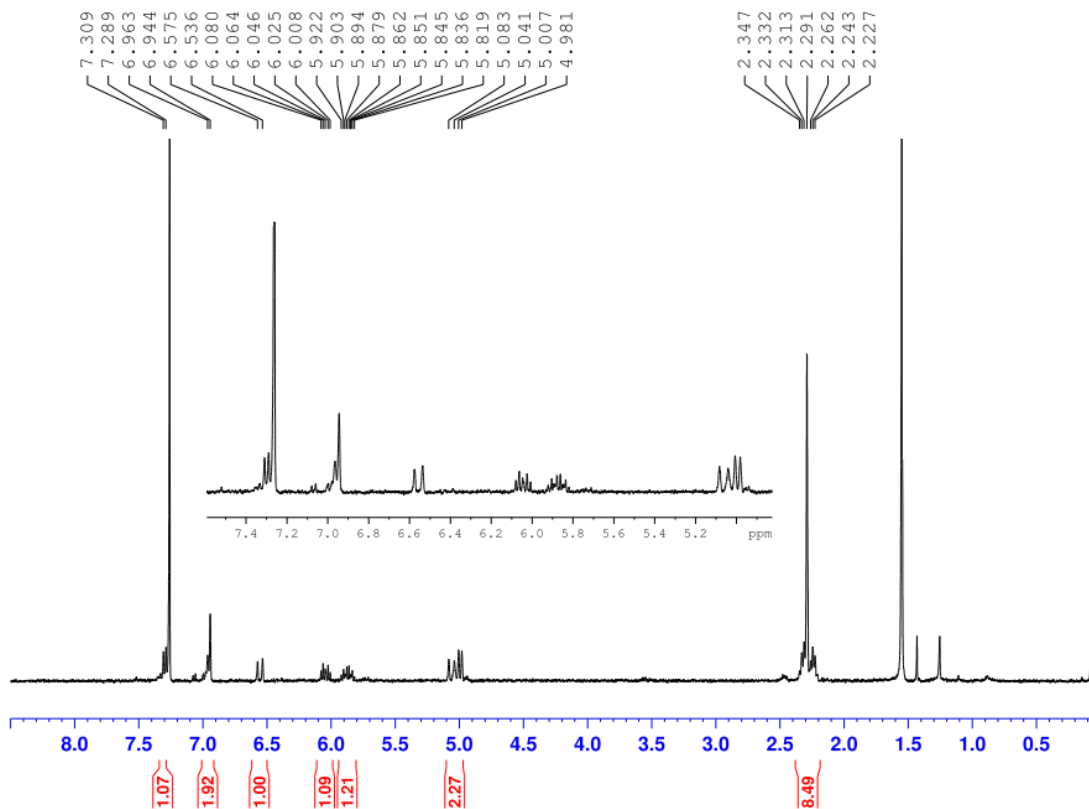

R2-143-1p, BBF01-400Hz, 13C, cdcl3

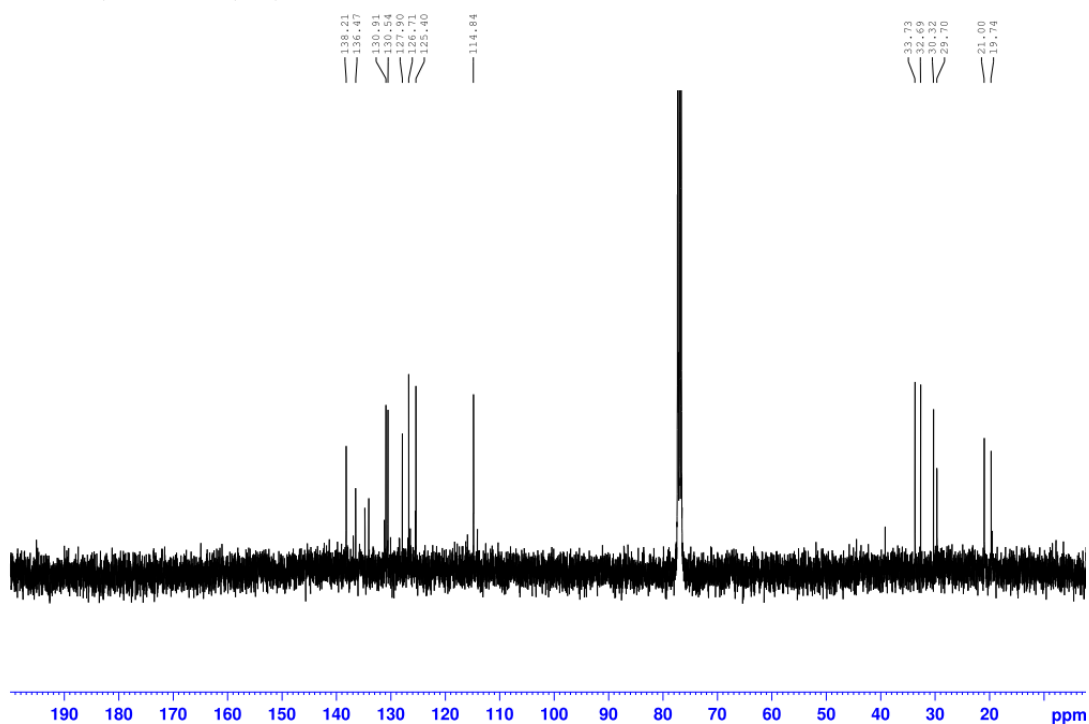

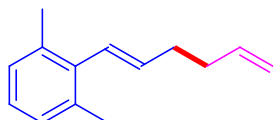

R2-137-1, BBF01-400Hz, 1H, cdcl3

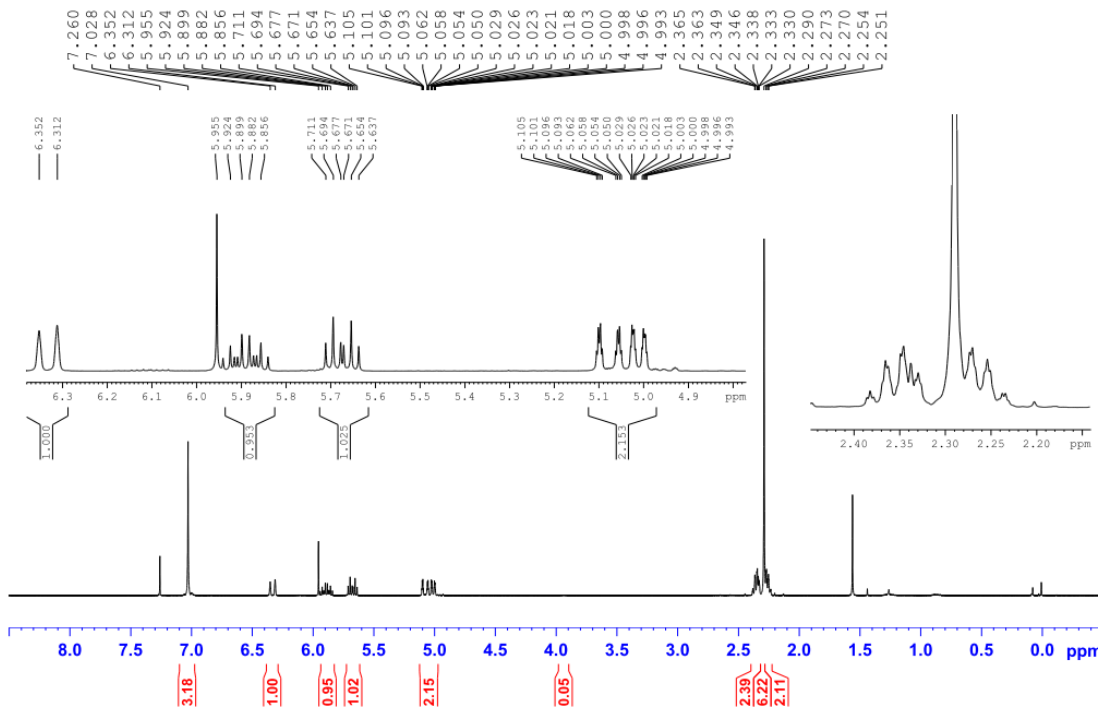

R2-137-1, BBF01-400Hz, 13C, cdcl3

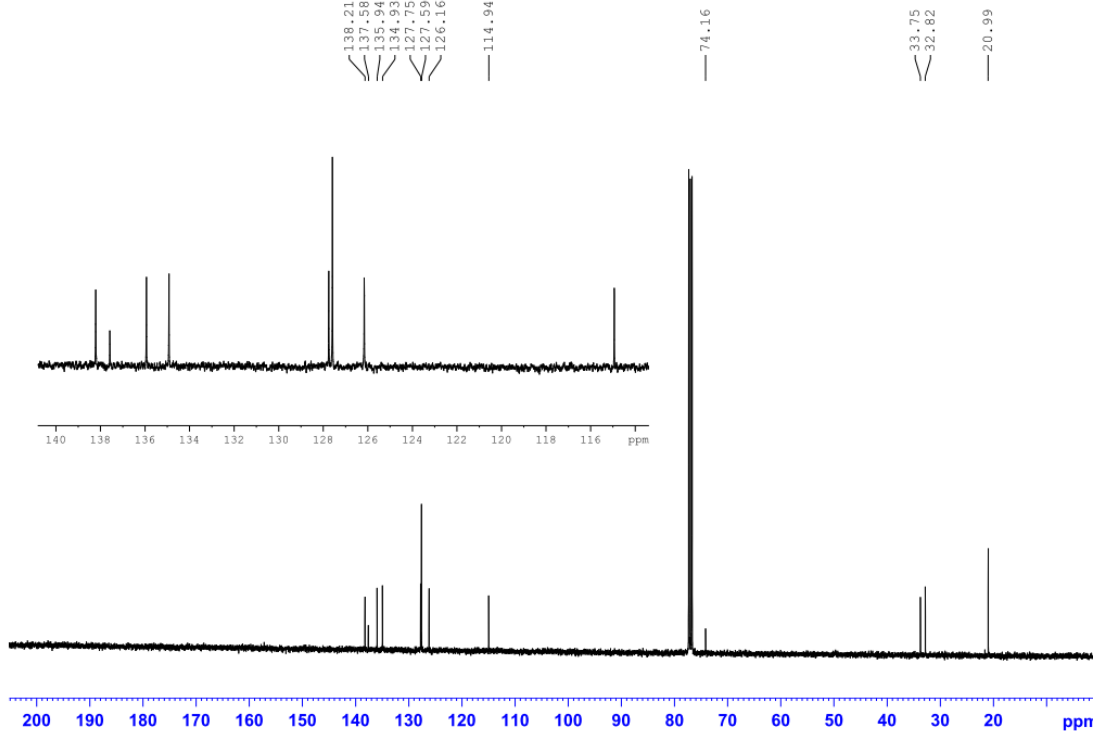

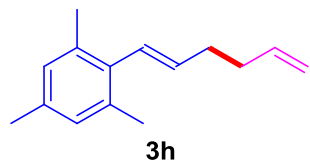

R2-144-1p, HNMR, AV400

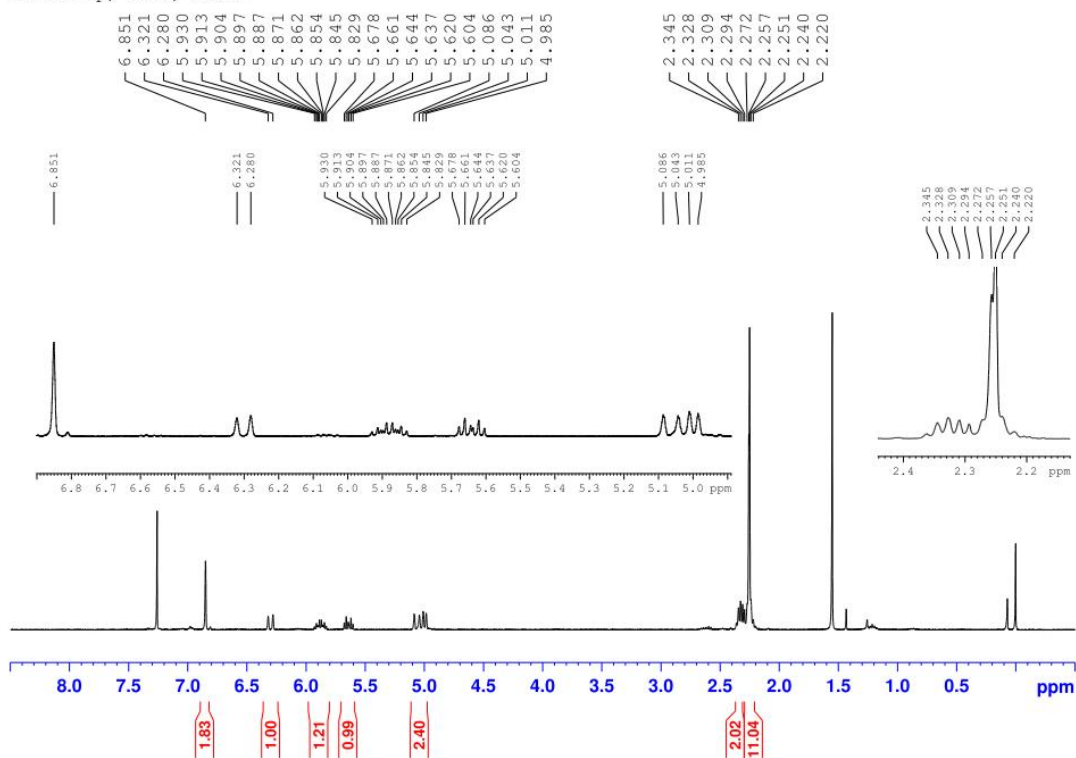

R2-144-1p, 13C NMR, AV400, cdcl3

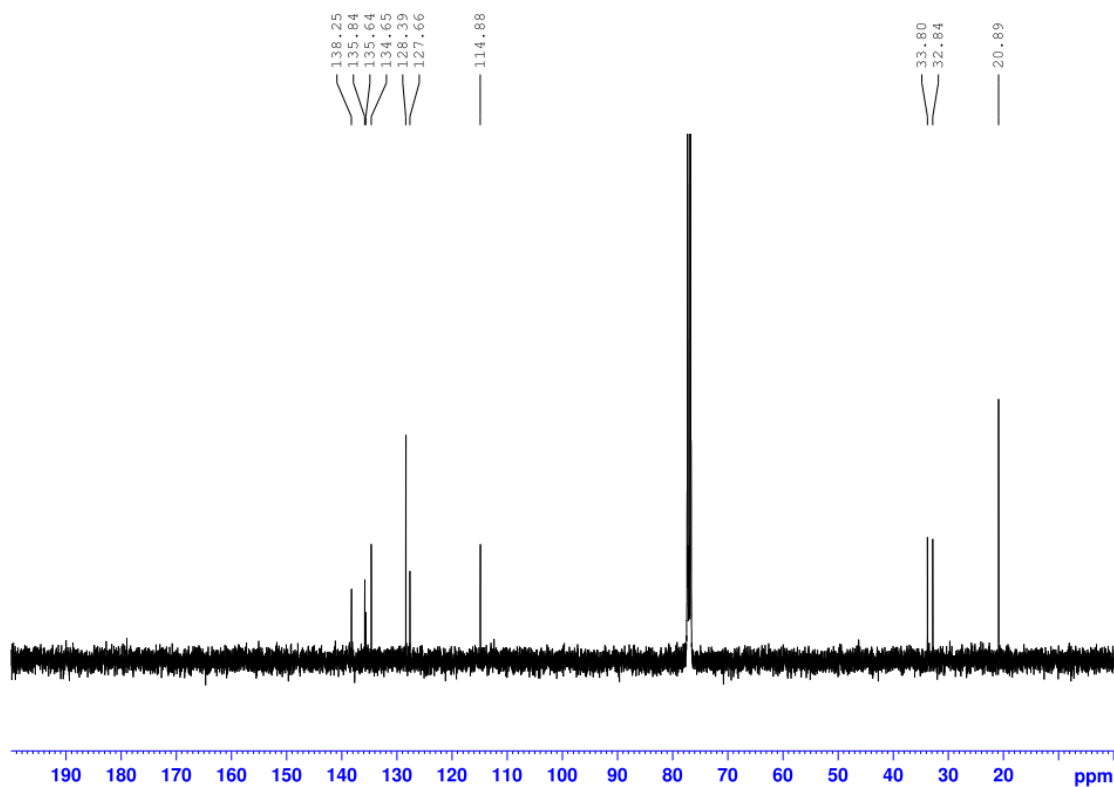

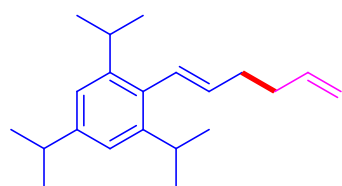

3i

R3-022-1p, 1H, Bruker 400 BBF01, CDCl3

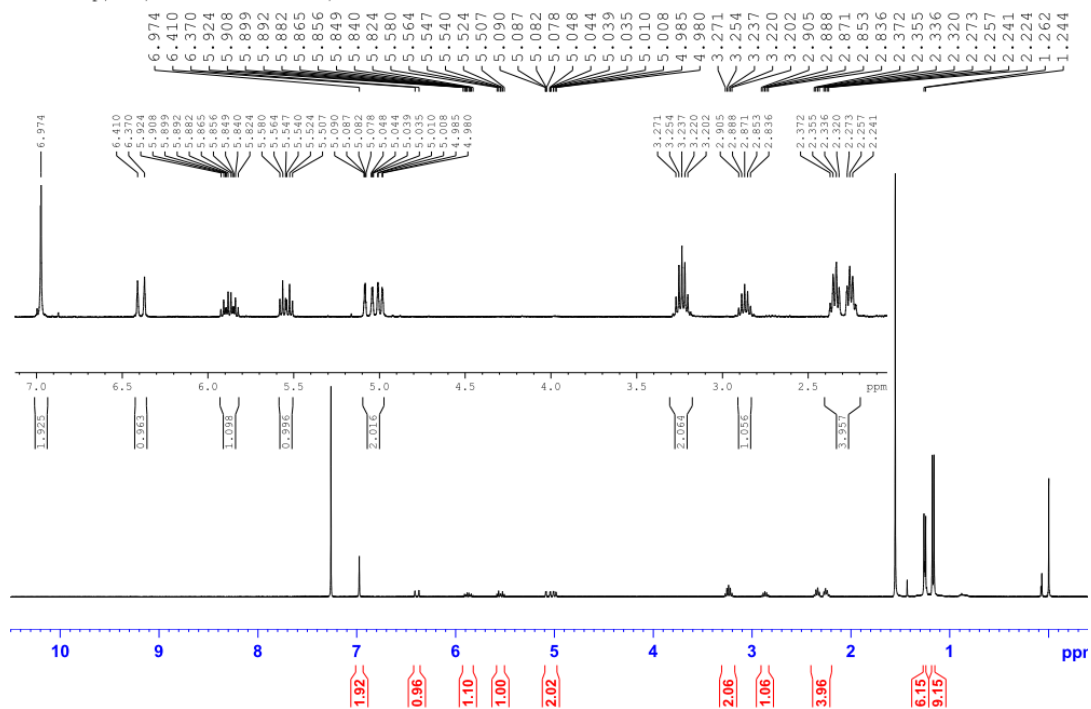

R3-022-1p, 13C, Bruker 400 BBF01, CDCl3

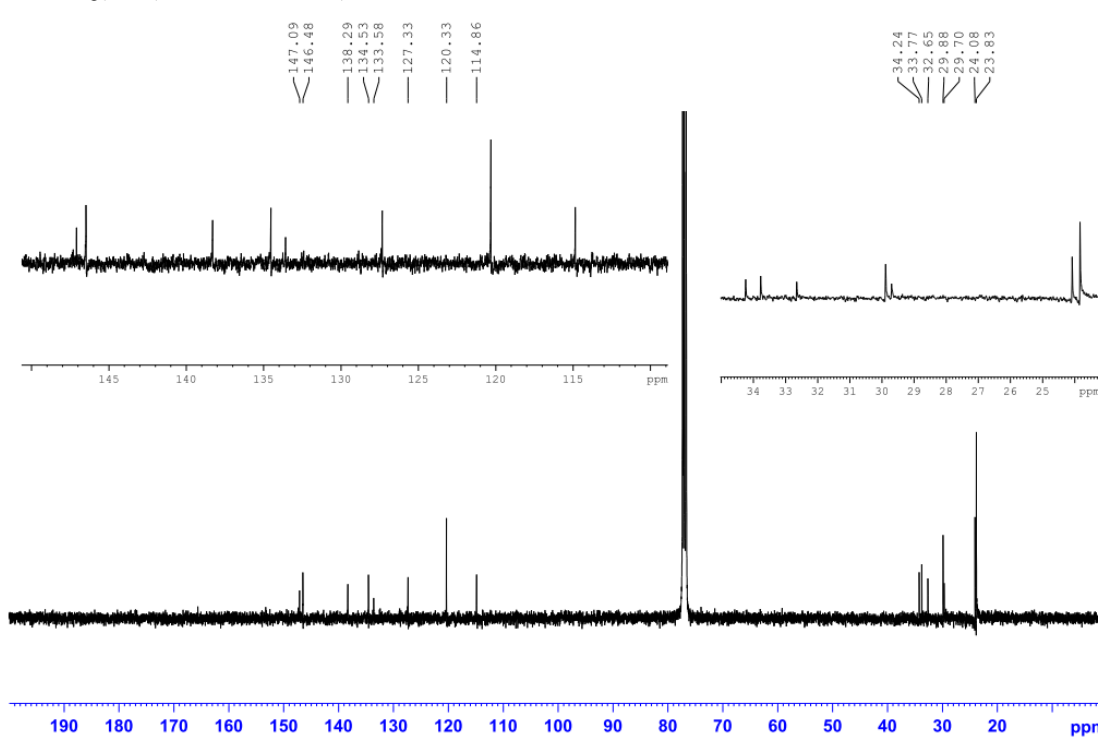

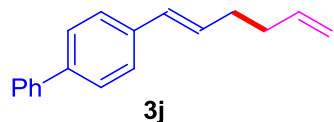

R2-138-1P, BBFO1-400Hz, 1H, cdcl3

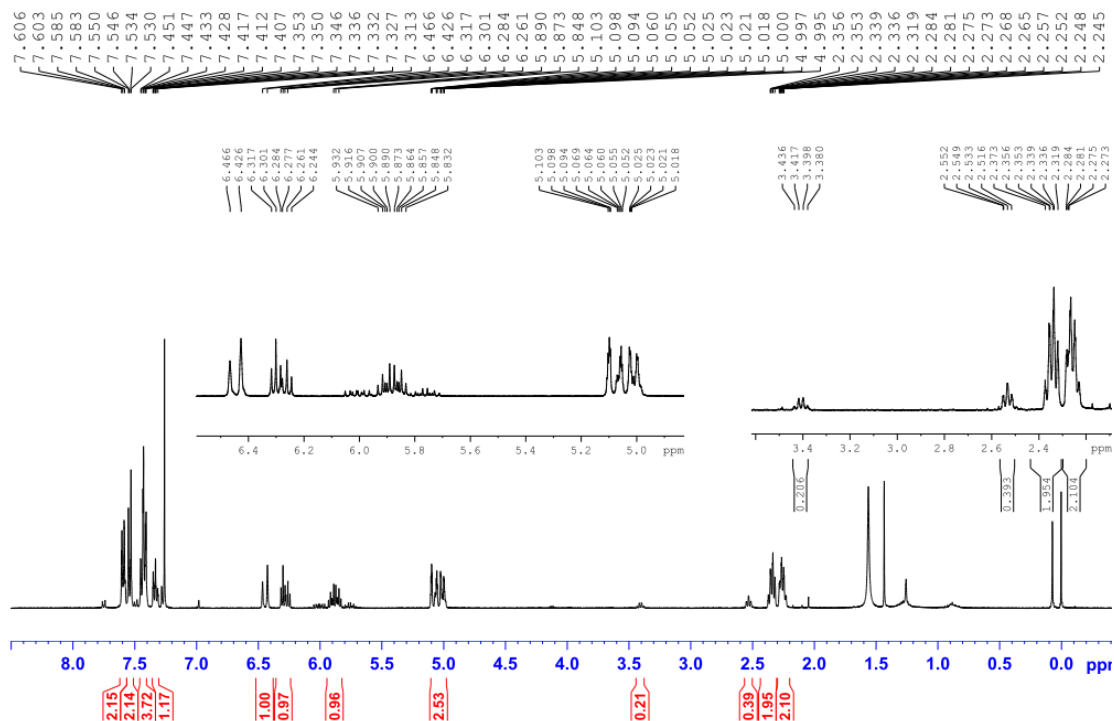

R2-138-1P, BBFO1-400Hz, 13C, cdcl3

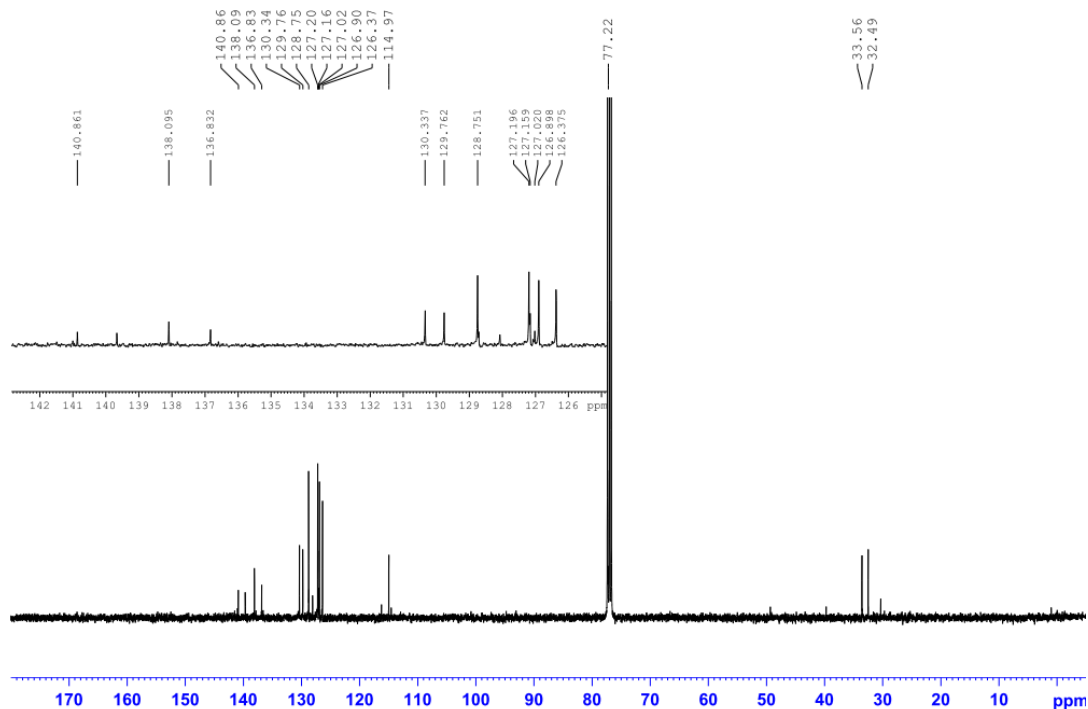

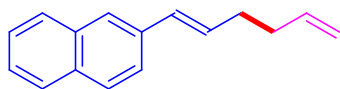

3k

R2-145-1, BBFO1-400Hz, 1H, cdcl3

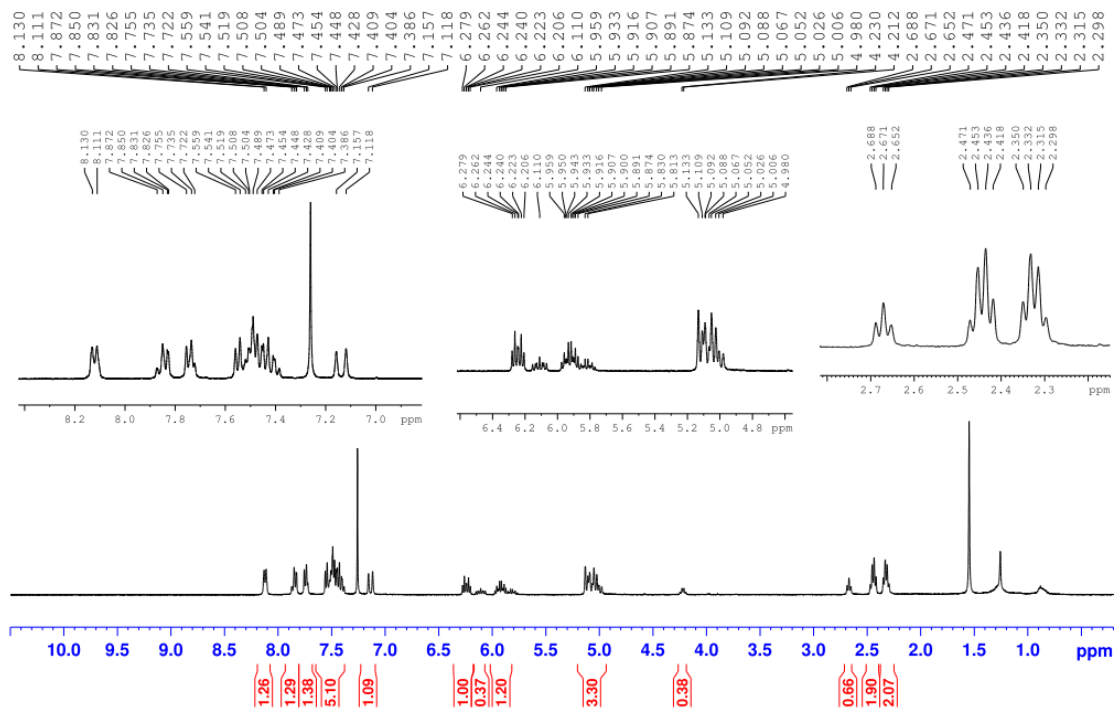

R2-145-1, BBFO1-400Hz, 13C, cdcl3

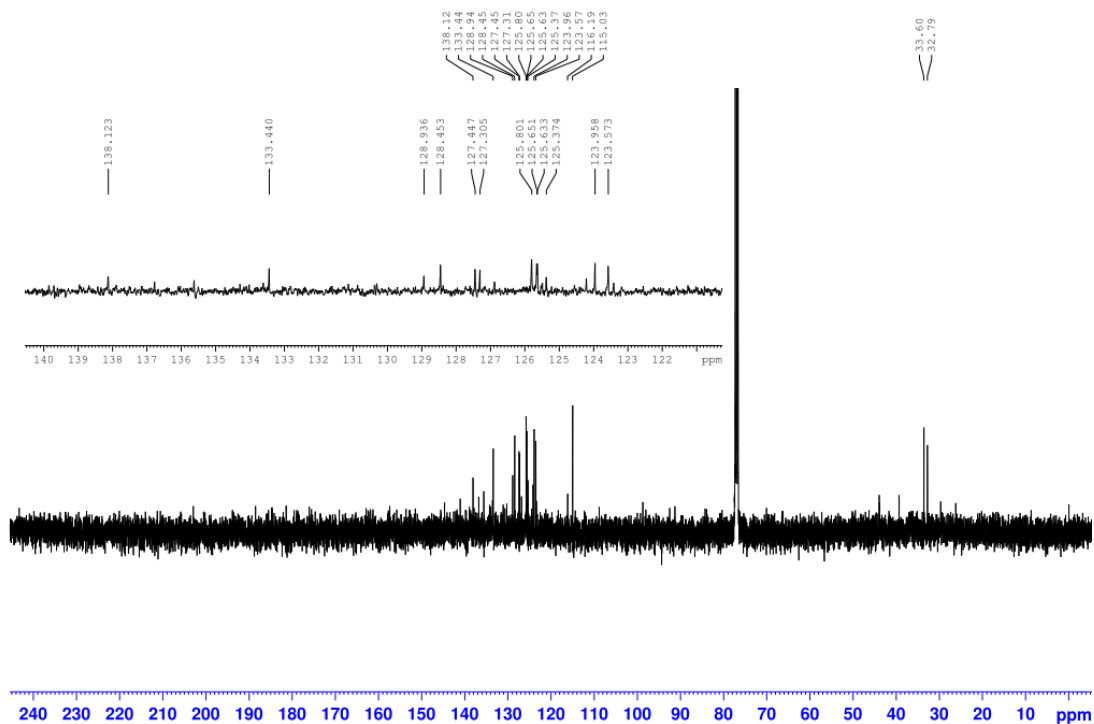

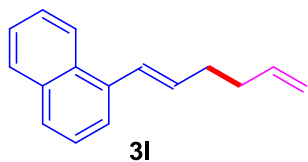

R3015-p, 300 MHz, <sup>1</sup>H NMR, CDCl<sub>3</sub>

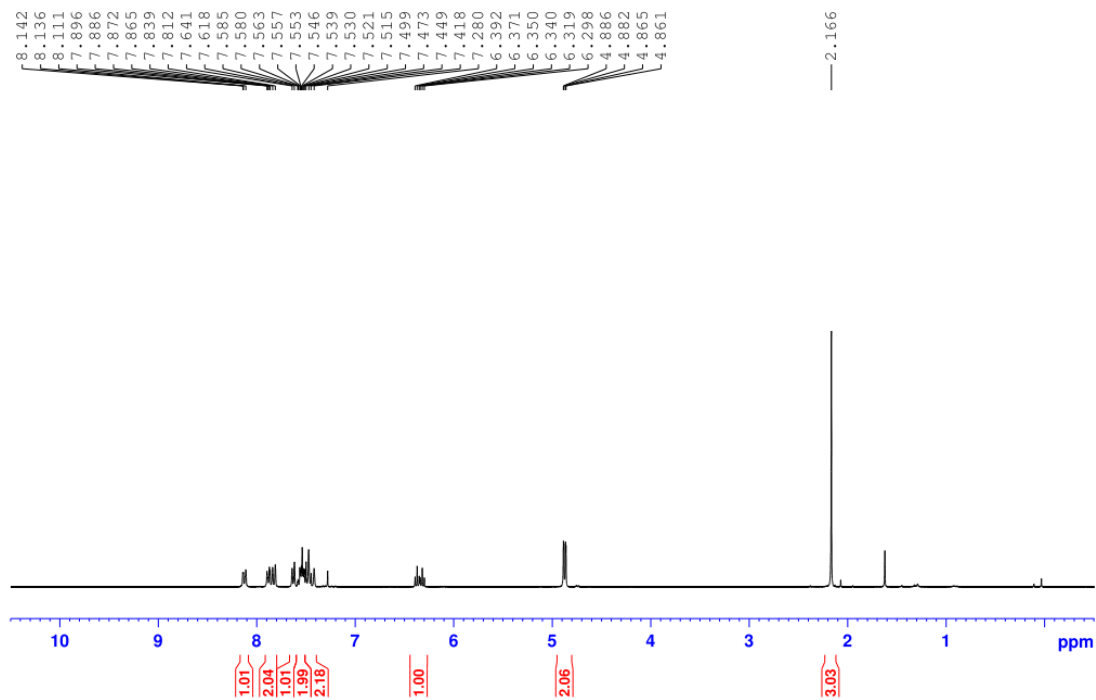

R3015-p, 300 MHz, <sup>13</sup>C NMR, CDCl<sub>3</sub>

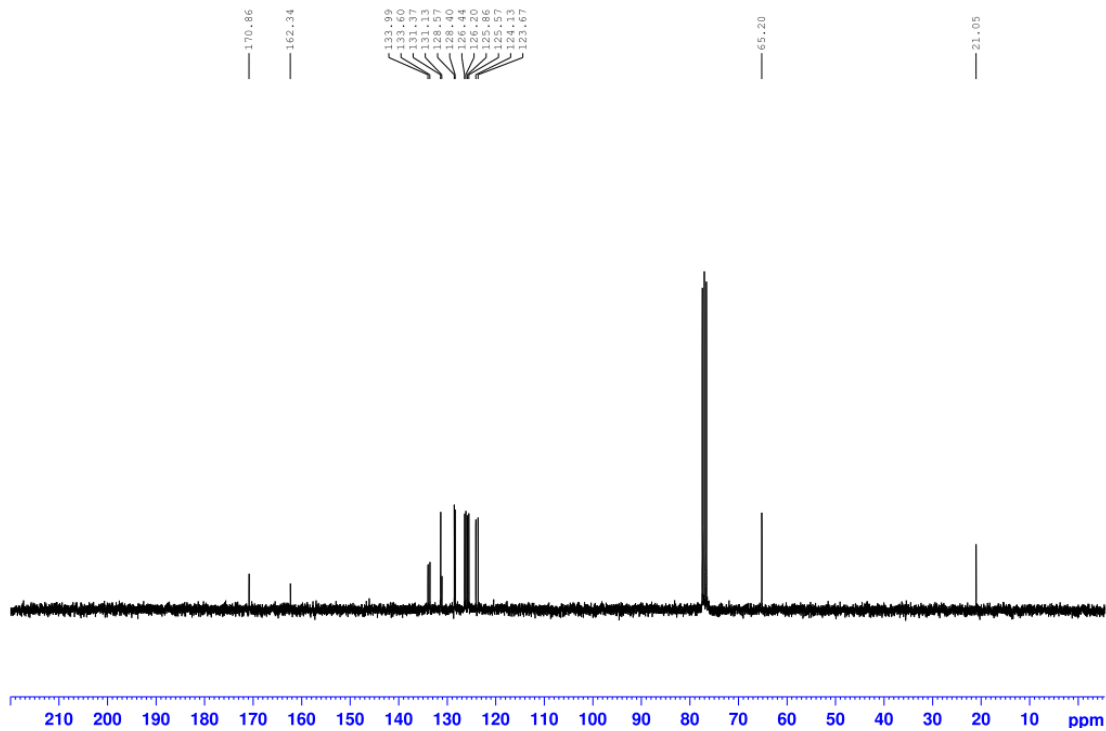



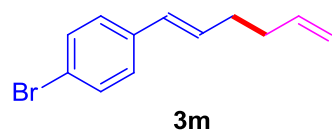

R2-150-2, 1H NMR, 300 MHz, CDCl<sub>3</sub>

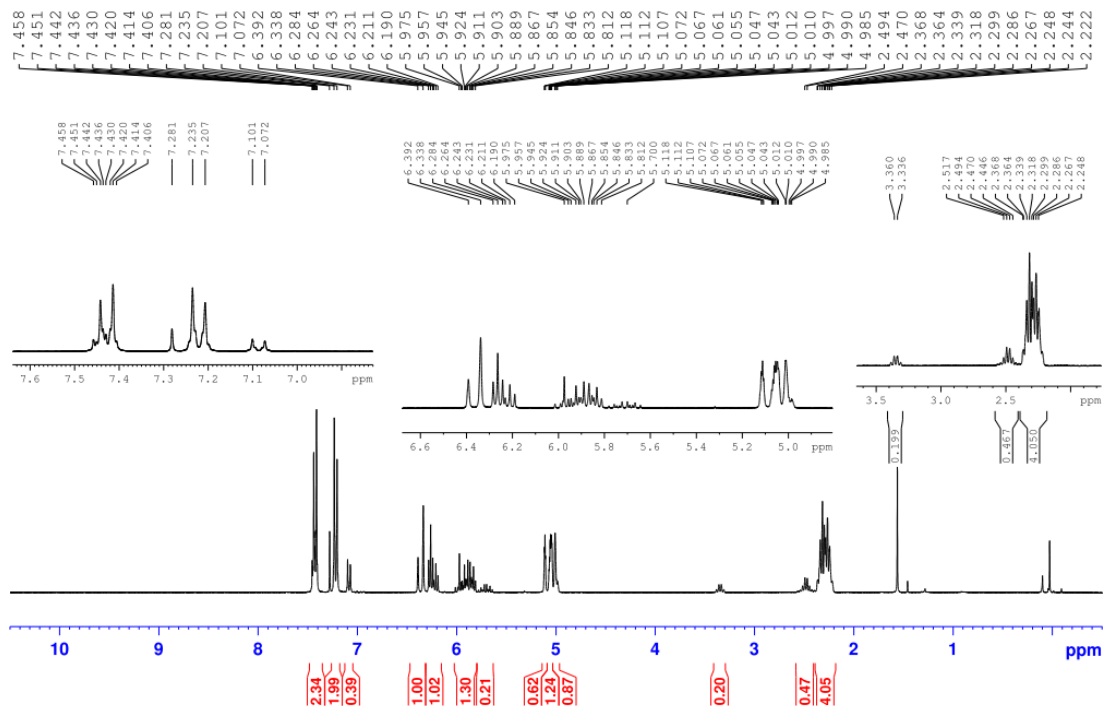

R2-150-1p, CDCl<sub>3</sub>, AV400, 13C NMR, AUG-2011

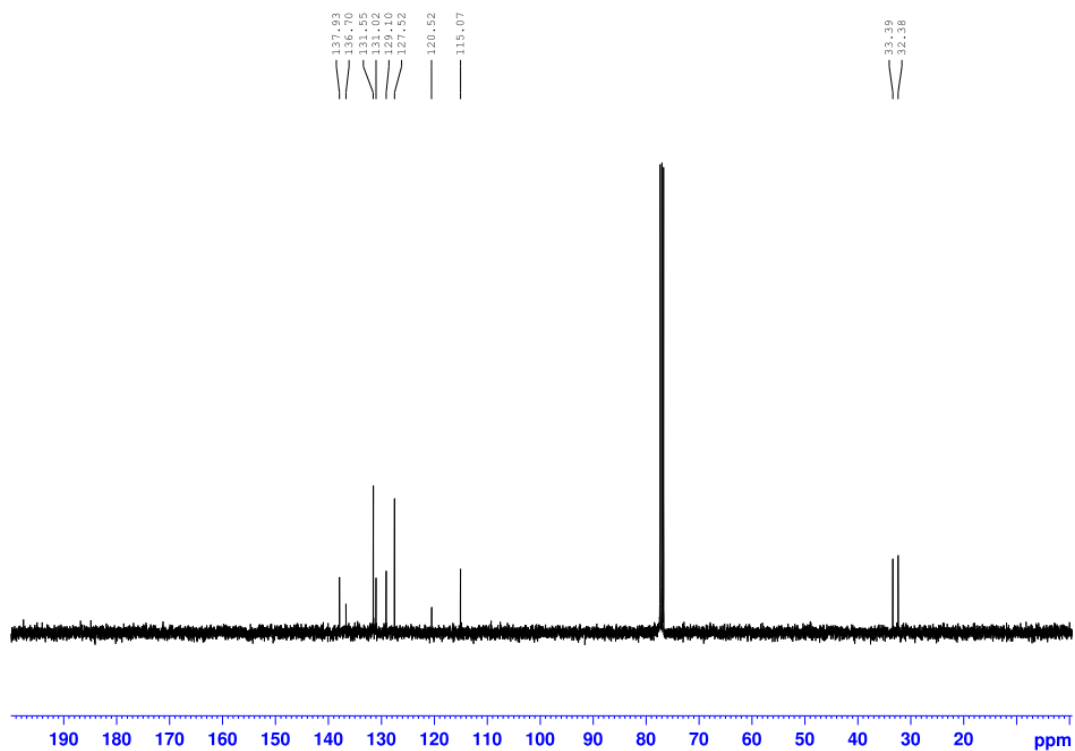

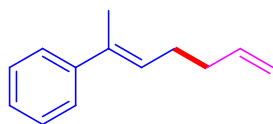

3n

R3042-1p, <sup>1</sup>H NMR, CDCl<sub>3</sub>, 300 MHz

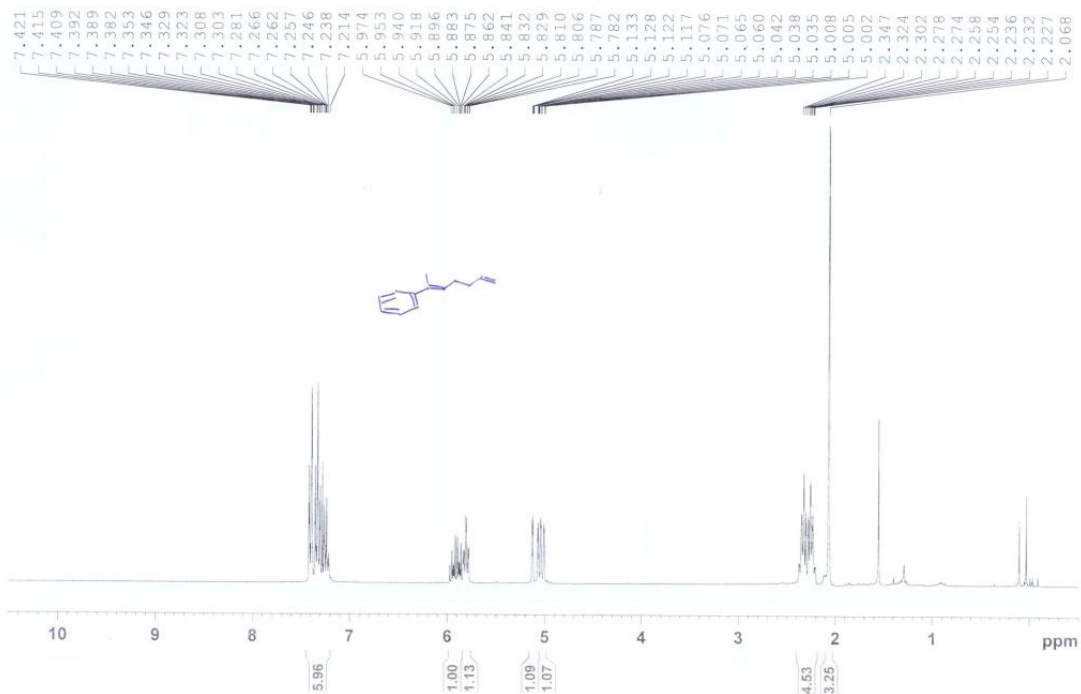

R3042-1p, <sup>13</sup>C NMR, CDCl<sub>3</sub>, 300 MHz

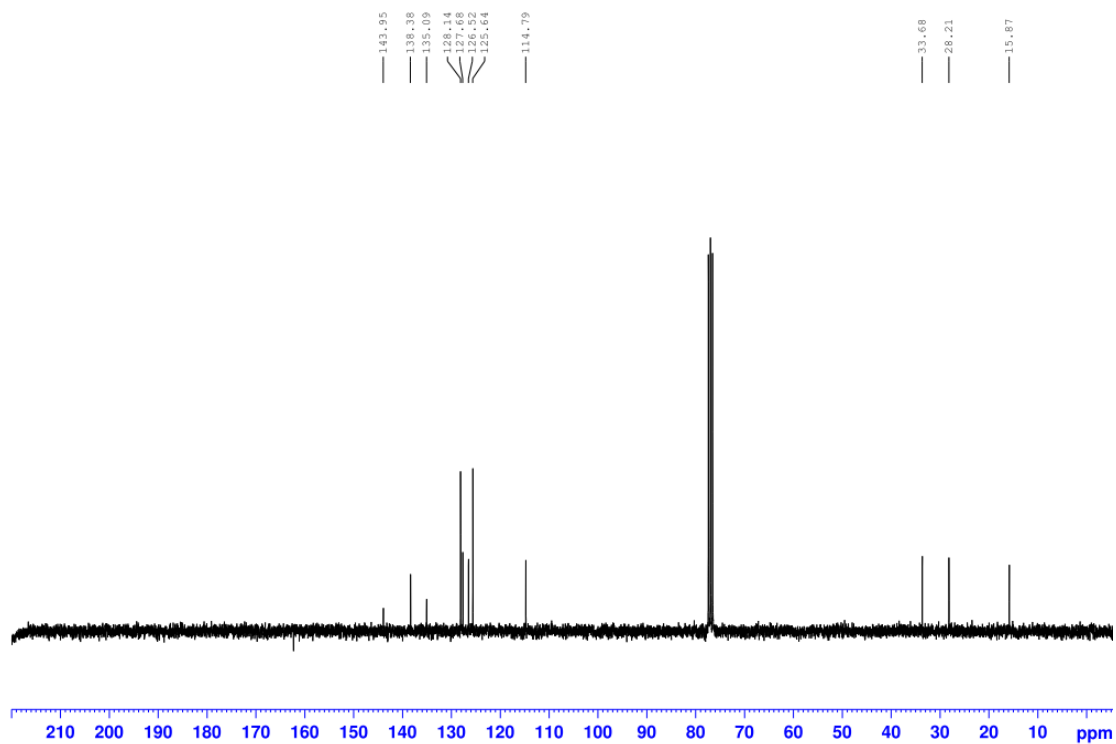

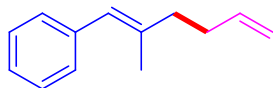

**3o**

R2-149-1P, BBFO1-400Hz, 1H, cdcl3

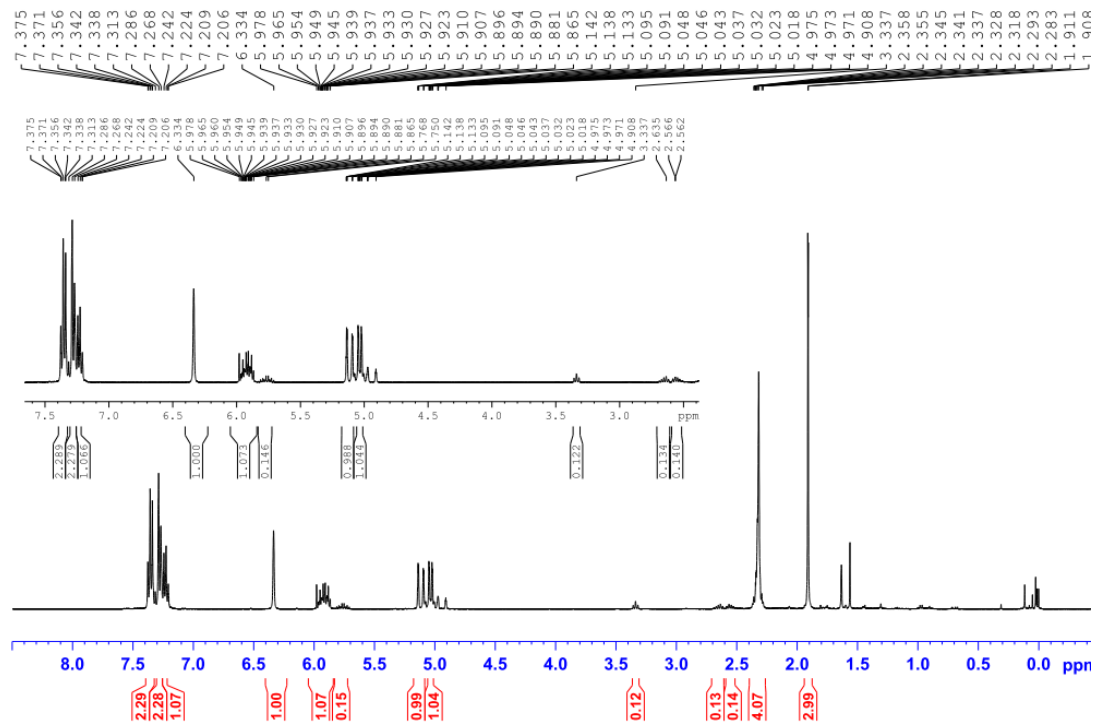

R2-149-1P, BBFO1-400Hz, 13C, cdcl3

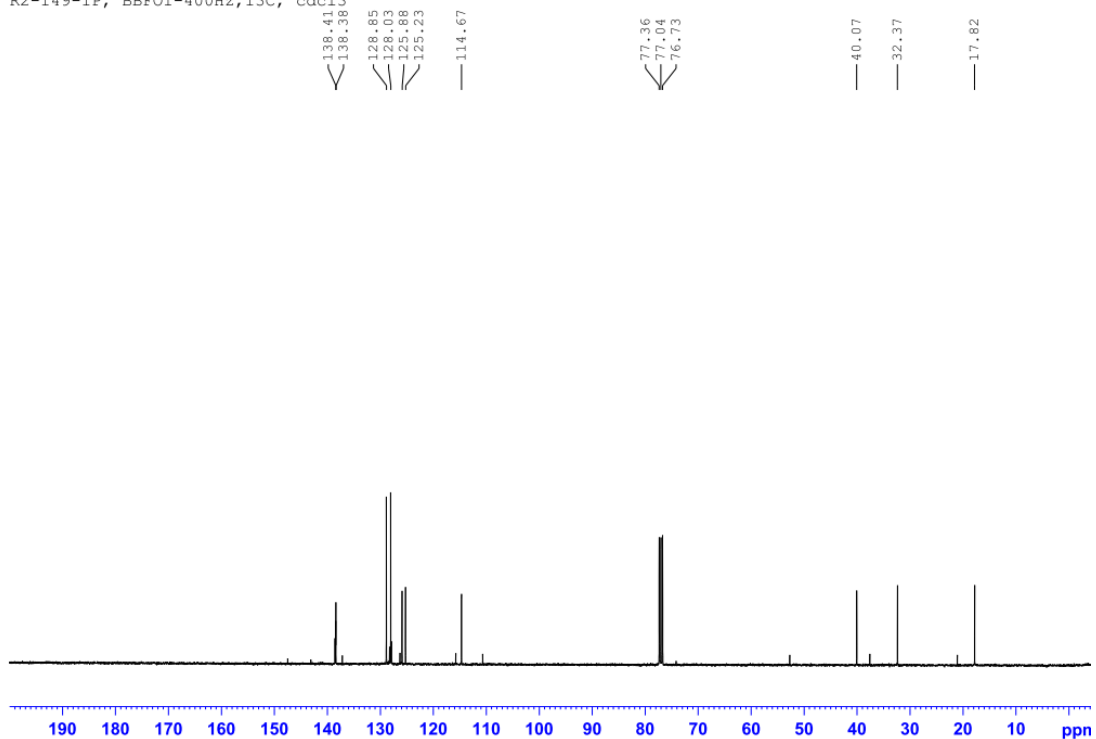

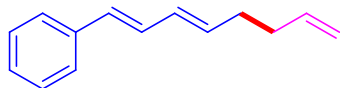

3p

D2-107-1p, <sup>1</sup>H NMR, AV400MHz, CDCl<sub>3</sub>

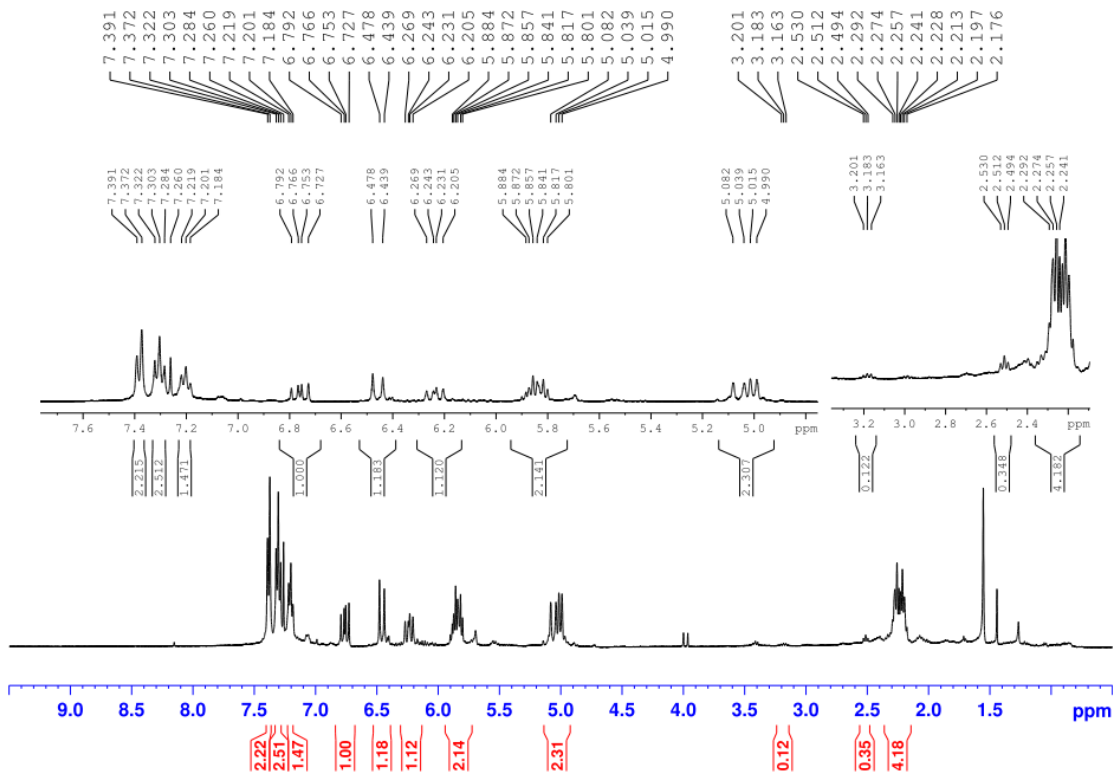

D2-107-1p, <sup>13</sup>C NMR, AV400MHz, CDCl<sub>3</sub>

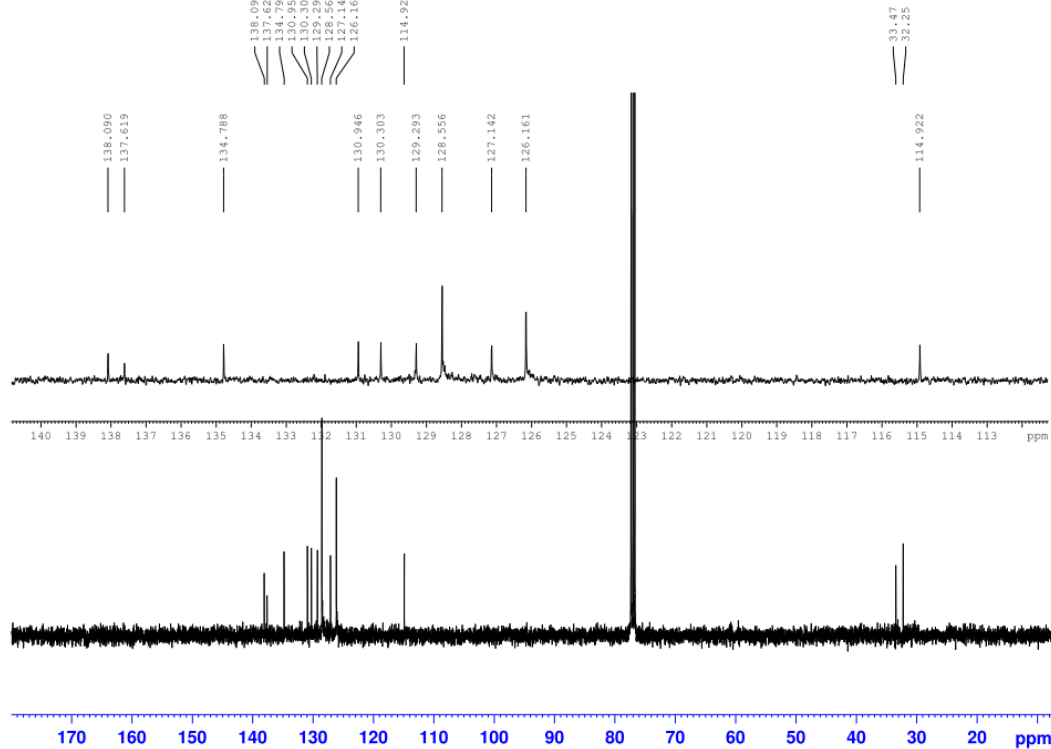

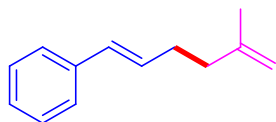

3q

R3005-p, 300 MHz, <sup>1</sup>HNMR, CDCl<sub>3</sub>

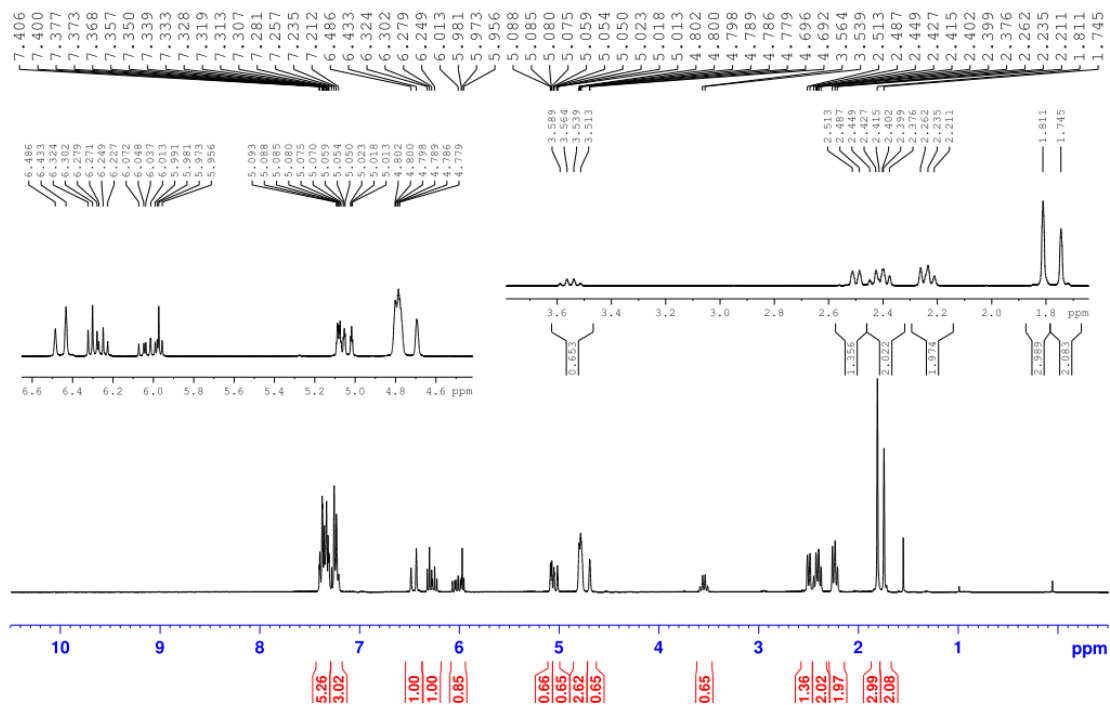

R3005-p, 300 MHz, <sup>13</sup>CNMR, CDCl<sub>3</sub>

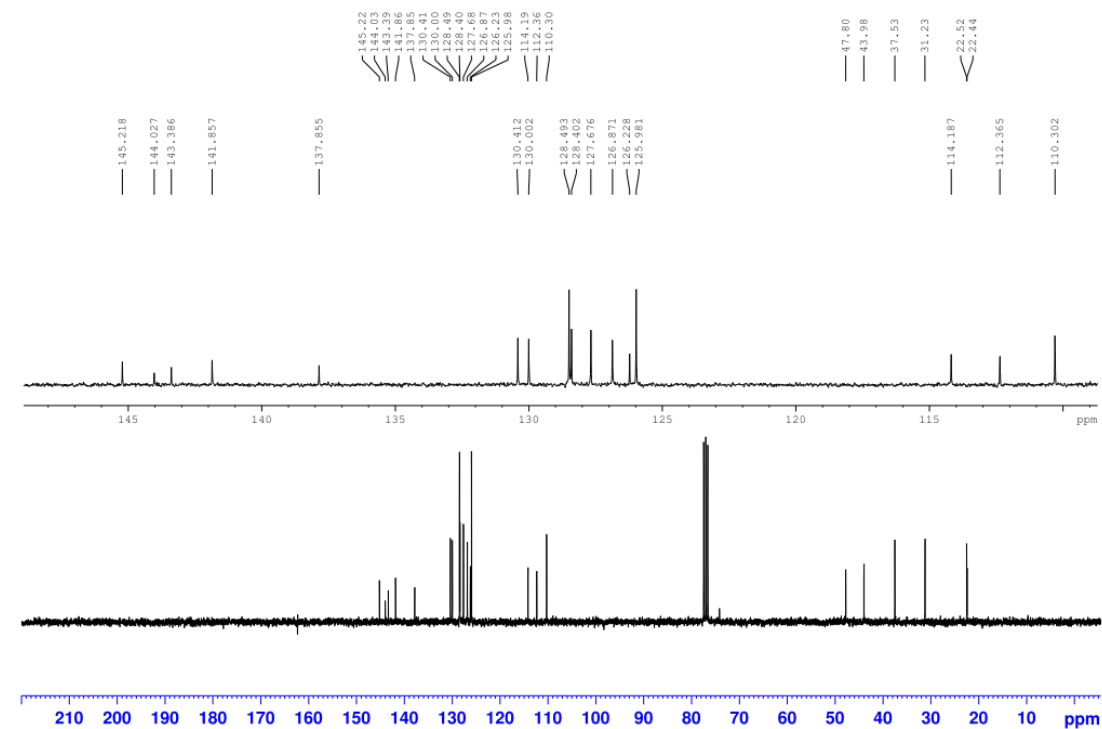

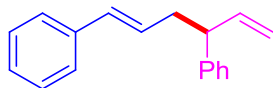

3r

R3-008-1, 1H, Bruker 400 BBFO1, CDCl<sub>3</sub>

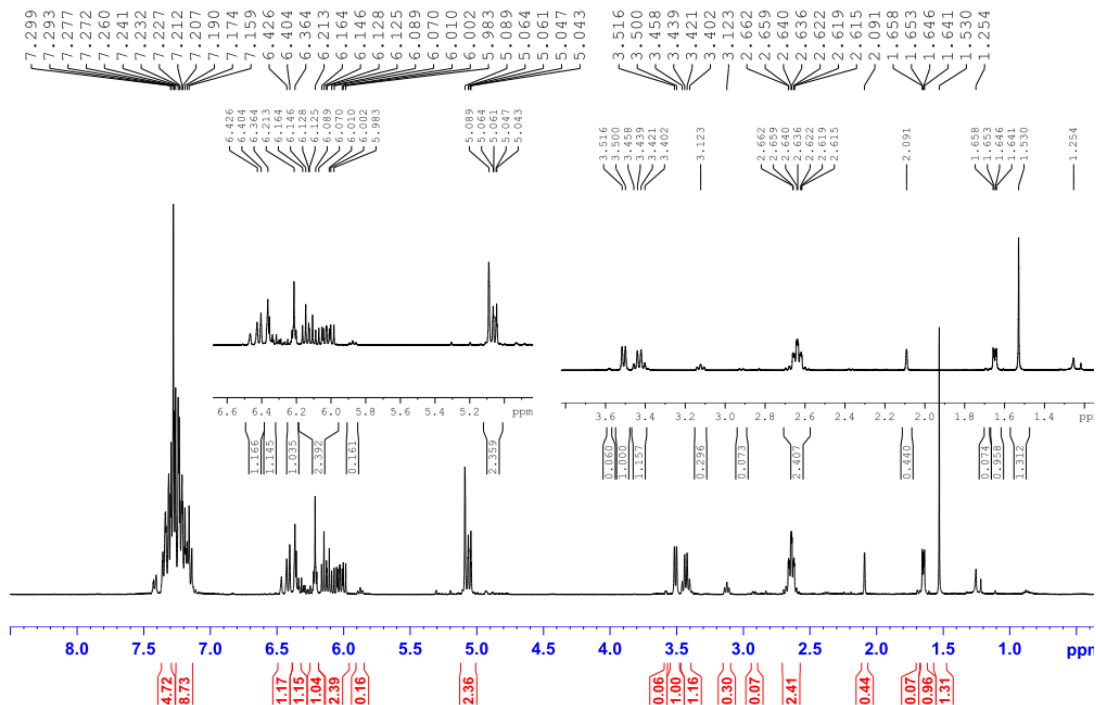

R3-008-1, 13C, Bruker 400 BBFO1, CDCl<sub>3</sub>

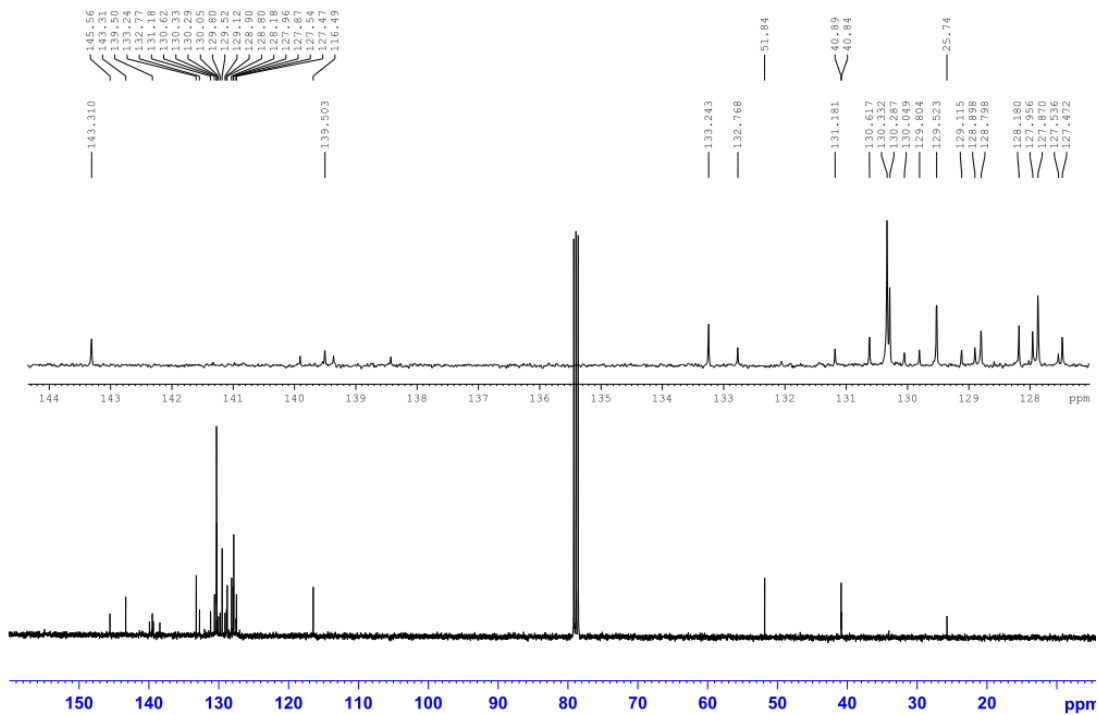

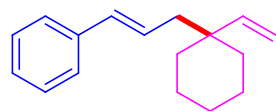

3s

R3-040-1p, 1H, BBFO1,400 Hz, CDC13

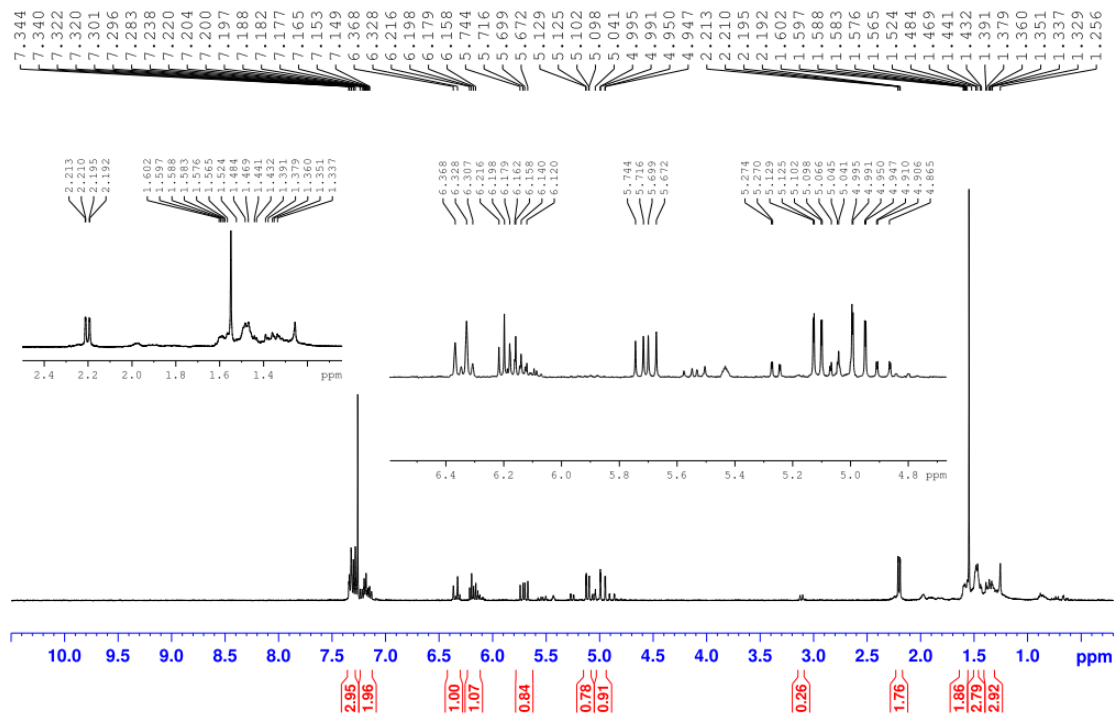

R3-040-1p, 13C, BBFO1,400 Hz, CDC13

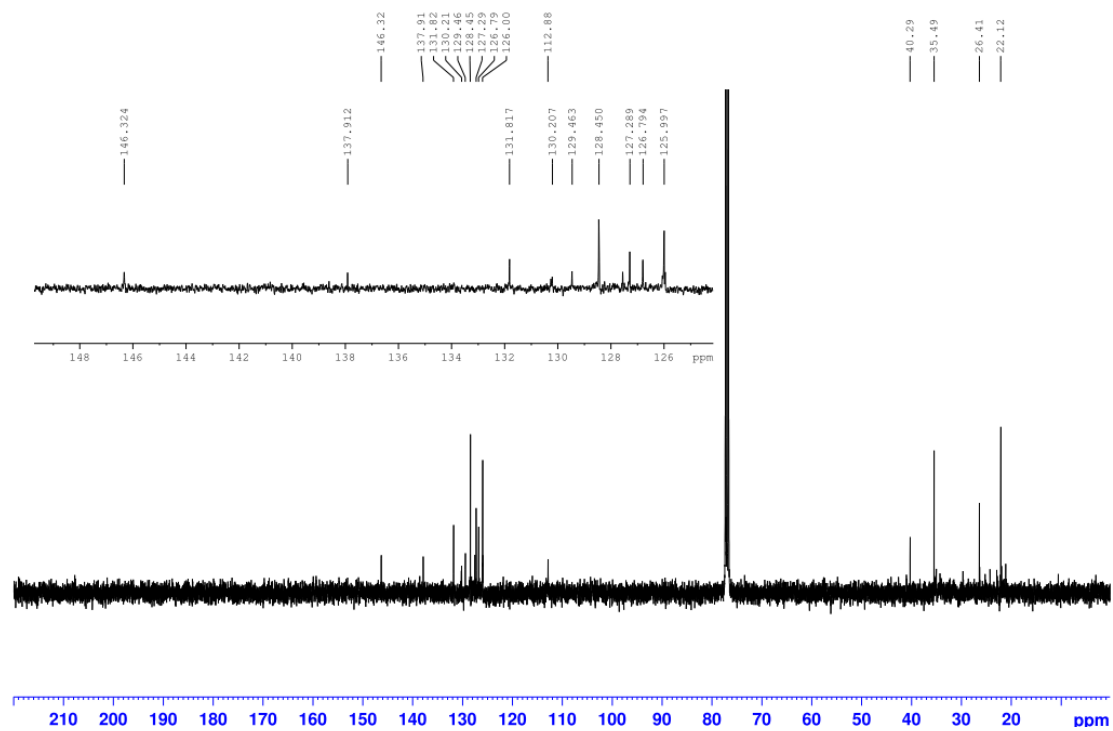

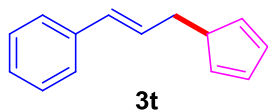

R3-018-1p, <sup>1</sup>H, 400MHZ, BBFO2, CDC13

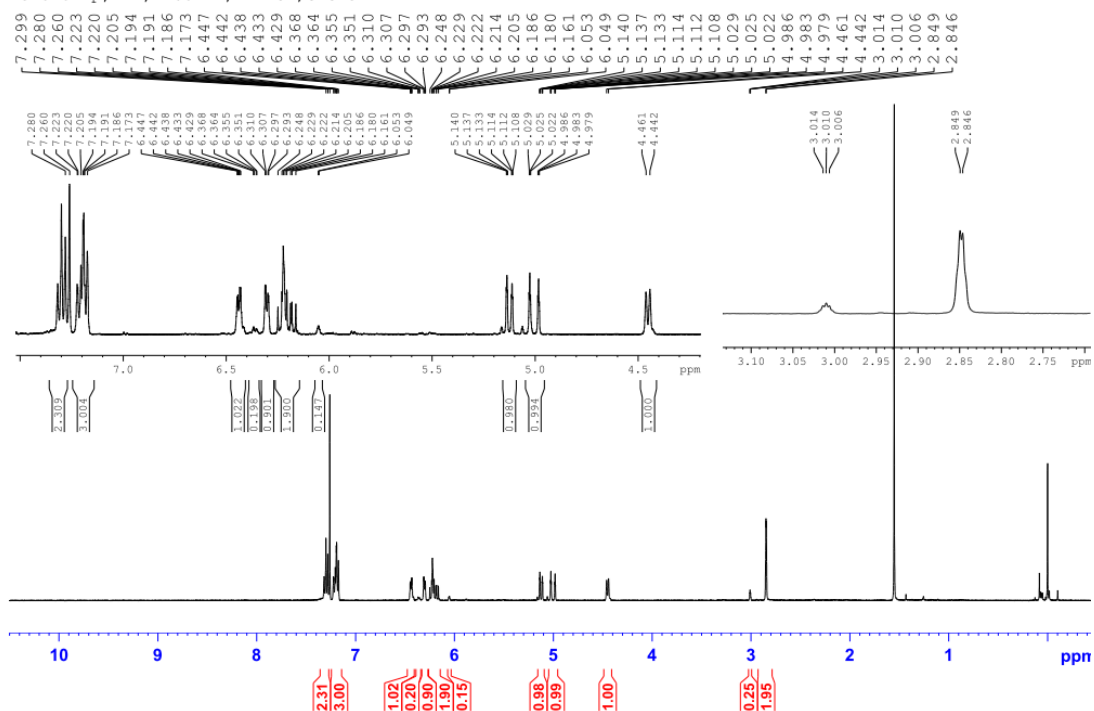

R3-018-1p, <sup>13</sup>C, 400MHZ, BBFO2, CDC13

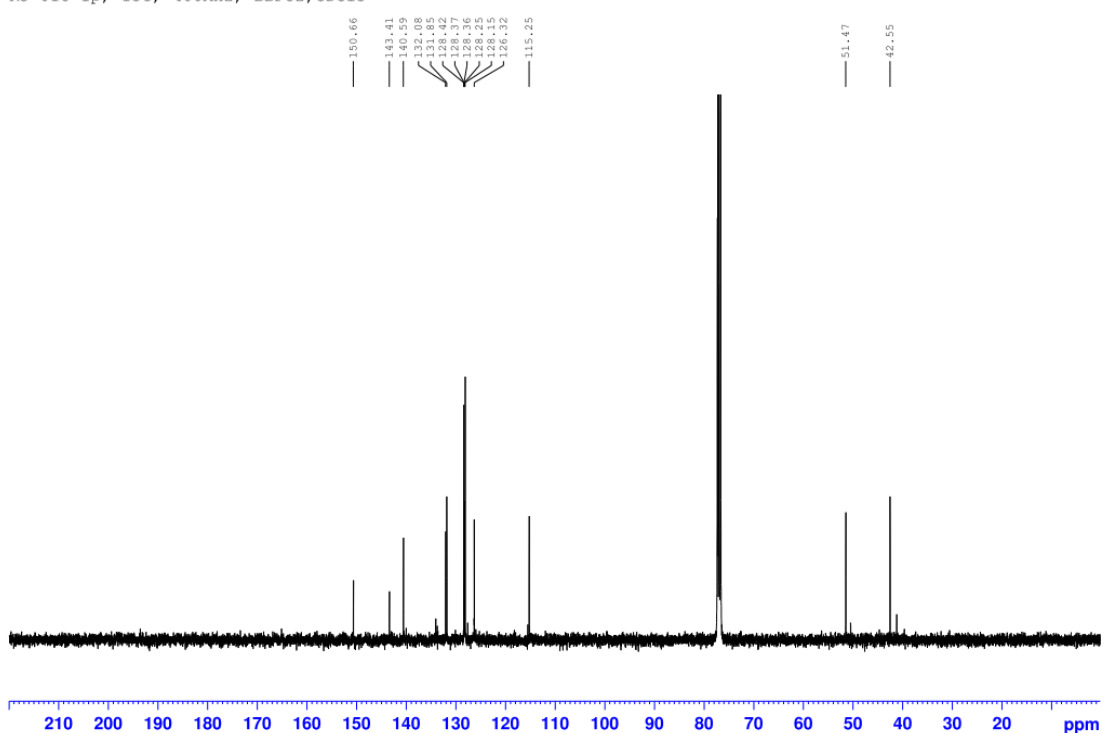

Supplement: c2cc33641c.pdf [file c2cc33641c.pdf]
